# Supplementary material for: Synthesis of quinazolinone scaffolds from the cascade reaction of o -aminobenzamides/ o -aminobenzonitriles and calcium carbide mediated by K 2 S
Source: Royal Society of Chemistry journal article supplement (doi:10.1039/d5qo01490e), 2026-01-01

## Supporting Information

### Synthesis of quinazolinone scaffolds from the cascade reaction of *o*-aminobenzamides/*o*-aminobenzonitrile and calcium carbide mediated by K<sub>2</sub>S

Shuyi Li,<sup>a</sup> Yunzhe Du,<sup>a</sup> Ligang Yan,<sup>a</sup> Siliu Cheng,<sup>a</sup> Shuang Cao,<sup>a</sup> Ruijun Xie,<sup>a</sup> Limin Han<sup>\*ab</sup> and Ning Zhu<sup>\*a</sup>

<sup>a</sup> College of Chemical Engineering, Inner Mongolia University of Technology, Inner Mongolia Engineering Research Center for CO<sub>2</sub> Capture and Utilization, Key Laboratory of CO<sub>2</sub> Resource Utilization at Universities of Inner Mongolia Autonomous Region, Hohhot 010051, China

<sup>b</sup> Inner Mongolia Vocational College of Chemical Engineering, Hohhot 010070, China

**E-mail:** zhuning@imut.edu.cn, hanlimin@imut.edu.cn

## Table of Contents

|                                                                                          |            |
|------------------------------------------------------------------------------------------|------------|
| <b>1. General Information .....</b>                                                      | <b>S2</b>  |
| <b>2. Optimization of Reaction Conditions .....</b>                                      | <b>S2</b>  |
| <b>3. Synthesis of the Substrates of <i>o</i>-aminobenzamides (1j-l, 1ha, 2am) .....</b> | <b>S4</b>  |
| <b>4. Experimental Procedures .....</b>                                                  | <b>S6</b>  |
| <b>5. Mechanistic Investigations .....</b>                                               | <b>S8</b>  |
| <b>6. Characterization of Products .....</b>                                             | <b>S10</b> |
| <b>8. X-ray Crystallography Data for 3p .....</b>                                        | <b>S21</b> |
| <b>8. References .....</b>                                                               | <b>S23</b> |
| <b>9. Spectral Data and Characterization.....</b>                                        | <b>S24</b> |

## 1. General Information

All reagents were purchased from commercial suppliers and used without further purification unless otherwise stated. Solvents were obtained from Shanghai Titan Scientific and used without additional purification. Calcium carbide with a purity of 98% was procured from Macklin. The reaction progress was monitored by thin-layer chromatography (TLC) under UV light at 254 nm and 365 nm. Column chromatography separations were carried out using silica gel (200–300 mesh). UPLC - HRMS measurements were performed on an Agilent 1290 infinity II-6546LC/Q-TOF, with methanol as the mobile phase. Both  $^1\text{H}$  and  $^{13}\text{C}$  NMR spectra were recorded in  $\text{DMSO-}d_6$  or  $\text{Chloroform-}d$  using an Agilent 500 MHz DD2 spectrometer.

## 2. Optimization of Reaction Conditions

**Table S1** Optimization of Reaction Conditions of synthesize 2-methyl-2,3-dihydroquinazolin-4(1H)-one from 2-aminobenzamide and  $\text{CaC}_2$  <sup>a</sup>

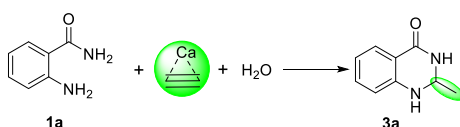

| Entry           | Additive             | Ratio           | T (°C) | Time (h) | Solvent | Yield <sup>b</sup> (%) |
|-----------------|----------------------|-----------------|--------|----------|---------|------------------------|
| 1               | $\text{K}_2\text{S}$ | 1: 2: 1: 3: 2   | 120    | 24       | NMP     | 59                     |
| 2               | $\text{K}_2\text{S}$ | 1: 2: 1: 3: 3   | 120    | 24       | NMP     | 89                     |
| 3               | $\text{K}_2\text{S}$ | 1: 2: 1: 3: 4   | 120    | 24       | NMP     | 86                     |
| 4               | $\text{K}_2\text{S}$ | 1: 2: 1: 3: 5   | 120    | 24       | NMP     | 83                     |
| 5               | $\text{K}_2\text{S}$ | 1: 2: 1: 3: 6   | 120    | 24       | NMP     | 65                     |
| 6               | $\text{K}_2\text{S}$ | 1: 2: 1: 3: 3   | 120    | 12       | NMP     | 92                     |
| 7               | $\text{K}_2\text{S}$ | 1: 2: 1: 3: 3   | 120    | 6        | NMP     | 95                     |
| 8               | $\text{K}_2\text{S}$ | 1: 2: 1: 3: 3   | 120    | 5        | NMP     | 96                     |
| 9               | $\text{K}_2\text{S}$ | 1: 2: 1: 3: 3   | 120    | 3        | NMP     | 89                     |
| 10              | $\text{K}_2\text{S}$ | 1: 2: 0: 3: 3   | 120    | 5        | NMP     | 42                     |
| 11              | $\text{K}_2\text{S}$ | 1: 2: 0.5: 3: 3 | 120    | 5        | NMP     | 89                     |
| 12              | $\text{K}_2\text{S}$ | 1: 2: 2: 3: 3   | 120    | 5        | NMP     | 53                     |
| 13              | $\text{K}_2\text{S}$ | 1: 2: 1: 4: 3   | 120    | 5        | NMP     | 96                     |
| 14 <sup>c</sup> | $\text{K}_2\text{S}$ | 1: 2: 1: 3: 3   | 120    | 5        | NMP     | 19                     |
| 15 <sup>d</sup> | $\text{K}_2\text{S}$ | 1: 2: 1: 3: 3   | 120    | 5        | NMP     | 90                     |
| 16 <sup>e</sup> | $\text{K}_2\text{S}$ | 1: 2: 1: 3: 3   | 120    | 5        | NMP     | 94                     |
| 17 <sup>f</sup> | $\text{K}_2\text{S}$ | 1: 2: 1: 3: 3   | 120    | 5        | NMP     | 41                     |
| 18              | $\text{K}_2\text{S}$ | 1: 2: 1: 1: 3   | 120    | 5        | NMP     | 61                     |

|    |                  |               |     |    |     |    |
|----|------------------|---------------|-----|----|-----|----|
| 19 | K <sub>2</sub> S | 1: 2: 1: 1: 3 | 120 | 24 | NMP | 92 |
| 20 | K <sub>2</sub> S | 1: 2: 1: 3: 3 | 130 | 5  | NMP | 61 |

<sup>a</sup> Reaction conditions: **1a** (1.0 mmol), mole ratio of **1a**: CaC<sub>2</sub>: KOH: K<sub>2</sub>S: H<sub>2</sub>O, and solvent (2.0 mL). <sup>b</sup> Yields were determined by <sup>1</sup>H NMR using pyrazine as an internal standard, isolated yields are given in parentheses. <sup>c</sup> KOH replaced by Et<sub>3</sub>N. <sup>d</sup> KOH replaced by KO<sup>t</sup>Bu. <sup>e</sup> KOH replaced by NaOH. <sup>f</sup> KOH replaced by CH<sub>3</sub>COONa.

**Table S2** Optimization of Reaction Conditions of synthesise 2-methyl-2,3-dihydroquinazolin-4(1H)-one from 2-aminobenzonitrile and CaC<sub>2</sub> <sup>a</sup>

Reaction scheme: 2-aminobenzonitrile (**2a**) + CaC<sub>2</sub> + H<sub>2</sub>O  $\xrightarrow[\text{solvent, T, t}]{\text{base, [S]}}$  2-methyl-2,3-dihydroquinazolin-4(1H)-one (**3a**)

| Entry           | Base                              |            | Additive              |          | T (°C)     | Time (h) | Solvent                          | Yield <sup>b</sup> (%) |
|-----------------|-----------------------------------|------------|-----------------------|----------|------------|----------|----------------------------------|------------------------|
|                 | kinds                             | mmol       | kinds                 | mmol     |            |          |                                  |                        |
| 1               | KOH                               | 2.5        | K <sub>2</sub> S      | 3        | 120        | 12       | DMSO                             | 42                     |
| 2               | KOH                               | 2.5        | K <sub>2</sub> S      | 3        | 120        | 12       | DMF                              | 45                     |
| 3               | KOH                               | 2.5        | K <sub>2</sub> S      | 3        | 120        | 12       | NMP                              | 68                     |
| 4               | KOH                               | 2.5        | K <sub>2</sub> S      | 3        | 120        | 12       | C <sub>2</sub> H <sub>5</sub> OH | 78                     |
| 5               | KOH                               | 2.5        | K <sub>2</sub> S      | 3        | 120        | 12       | 1,4-dioxane                      | 15                     |
| 6               | KOH                               | 2.5        | K <sub>2</sub> S      | 3        | 120        | 12       | <i>n</i> -butanol                | 98                     |
| 7               | KOH                               | 2.5        | K <sub>2</sub> S      | 3        | 120        | 12       | <i>n</i> -hexanol                | 98                     |
| 8               | KOH                               | 2.5        | K <sub>2</sub> S      | 2        | 120        | 12       | <i>n</i> -hexanol                | 85                     |
| 9               | KOH                               | 2.5        | K <sub>2</sub> S      | 1        | 120        | 12       | <i>n</i> -hexanol                | 65                     |
| 10              | KOH                               | 2.5        | -                     | -        | 120        | 12       | <i>n</i> -hexanol                | trace                  |
| 11              | KOH                               | 2.5        | S                     | 3        | 120        | 12       | <i>n</i> -hexanol                | 23                     |
| 12              | KOH                               | 2          | K <sub>2</sub> S      | 3        | 120        | 12       | <i>n</i> -hexanol                | 84                     |
| 13              | KOH                               | 3          | K <sub>2</sub> S      | 3        | 120        | 12       | <i>n</i> -hexanol                | 64                     |
| 14              | C <sub>4</sub> H <sub>9</sub> OK  | 2.5        | K <sub>2</sub> S      | 3        | 120        | 12       | <i>n</i> -hexanol                | 80                     |
| 15              | NaOH                              | 2.5        | K <sub>2</sub> S      | 3        | 120        | 12       | <i>n</i> -hexanol                | 98                     |
| 16              | C <sub>4</sub> H <sub>9</sub> ONa | 2.5        | K <sub>2</sub> S      | 3        | 120        | 12       | <i>n</i> -hexanol                | 87                     |
| 17              | K <sub>2</sub> CO <sub>3</sub>    | 2.5        | K <sub>2</sub> S      | 3        | 110        | 12       | <i>n</i> -hexanol                | 91                     |
| 18 <sup>c</sup> | KOH                               | 2.5        | K <sub>2</sub> S      | 3        | 120        | 12       | <i>n</i> -hexanol                | 95                     |
| 19 <sup>d</sup> | KOH                               | 2.5        | K <sub>2</sub> S      | 3        | 120        | 12       | <i>n</i> -hexanol                | 92                     |
| 20 <sup>e</sup> | KOH                               | 2.5        | K <sub>2</sub> S      | 3        | 120        | 12       | <i>n</i> -hexanol                | 62                     |
| 21              | KOH                               | 2.5        | K <sub>2</sub> S      | 3        | 110        | 12       | <i>n</i> -hexanol                | 98                     |
| 22              | KOH                               | 2.5        | K <sub>2</sub> S      | 3        | 130        | 12       | <i>n</i> -hexanol                | 87                     |
| 23              | KOH                               | 2.5        | K <sub>2</sub> S      | 3        | 100        | 12       | <i>n</i> -hexanol                | 82                     |
| 24              | KOH                               | 2.5        | K <sub>2</sub> S      | 3        | 110        | 18       | <i>n</i> -hexanol                | 98                     |
| 25              | KOH                               | 2.5        | K <sub>2</sub> S      | 3        | 110        | 24       | <i>n</i> -hexanol                | 98                     |
| 26              | KOH                               | 2.5        | K <sub>2</sub> S      | 3        | 110        | 8        | <i>n</i> -hexanol                | 80                     |
| 27              | NaOH                              | 2.5        | K <sub>2</sub> S      | 3        | 110        | 12       | <i>n</i> -butanol                | 98                     |
| <b>28</b>       | <b>NaOH</b>                       | <b>2.5</b> | <b>K<sub>2</sub>S</b> | <b>3</b> | <b>110</b> | <b>8</b> | <b><i>n</i>-butanol</b>          | <b>98</b>              |

|    |      |     |                  |   |     |   |                   |    |
|----|------|-----|------------------|---|-----|---|-------------------|----|
| 29 | NaOH | 2.5 | K <sub>2</sub> S | 3 | 110 | 5 | <i>n</i> -butanol | 82 |
|----|------|-----|------------------|---|-----|---|-------------------|----|

<sup>a</sup> Reaction conditions: **1a** (1.0 mmol), CaC<sub>2</sub> (2 mmol), H<sub>2</sub>O (6 mmol), and solvent (2.0 mL). <sup>b</sup> NMR yield. <sup>c</sup> H<sub>2</sub>O (5 mmol). <sup>d</sup> H<sub>2</sub>O (7 mmol). <sup>e</sup> CaC<sub>2</sub> (1 mmol), H<sub>2</sub>O (4 mmol).

### 3. Synthesis of the Substrates of o-aminobenzamides (**1j-l**, **1ha**, **2am**)

#### 3.1 General Procedure for the Preparation of 2-amino-N-benzamides (**1j-l**)<sup>1</sup>

In a round-bottomed flask containing isatoic anhydride (3 mmol, 489 mg, 1.0 equiv.) in DMF (5 mL), amine **1js-ls** (3 mmol, 1.0 equiv.) was added. Subsequently, the mixtures were heated to 60 °C in an oil bath and stirred for 12 h. After the reaction was completed, the reaction mixture was dissolved in 10 mL of ethyl acetate and washed three times with 20 mL of water each time. The aqueous layer was further extracted with ethyl acetate (3 × 10 mL). The combined organic layers were dried over MgSO<sub>4</sub>, and the solvent was removed using a rotary evaporator. The crude product was then further purified by column chromatography on silica gel with a petroleum ether/ethyl acetate ratio of 6/1 to obtain the pure compounds **1j-l**.

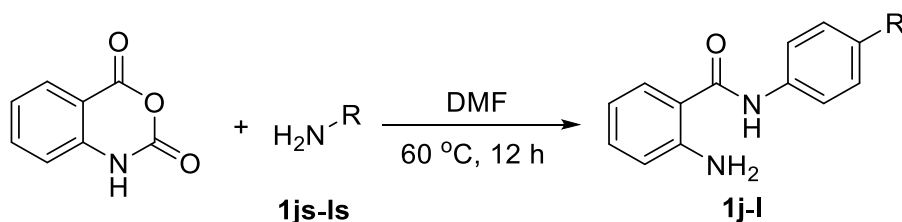

#### 3.2 General Procedure for the Preparation of 2-(benzylamino)-N-methylbenzamide (**1ha**)<sup>2</sup>

A mixture composed of 2-aminobenzamide (7 mmol, 1.68 g), K<sub>2</sub>CO<sub>3</sub> (7 mmol, 1.71 g), KI (7 mmol, 1.16 g), and benzyl bromide (10 mmol, 1.71 g) in DMF (10 mL) was stirred at room temperature for 12 hours. Upon the reaction was complete, the reaction mixture was dissolved in 10 mL of ethyl acetate and washed three times with 20 mL of water each time. The aqueous layer was further extracted with ethyl acetate (3 × 10 mL). The organic layer was subsequently washed with brine, dried over anhydrous MgSO<sub>4</sub>, and concentrated under reduced pressure. The obtained residue was further purified via flash column chromatography, resulting in the isolation of the desired product **1ha** with an 85% yield.

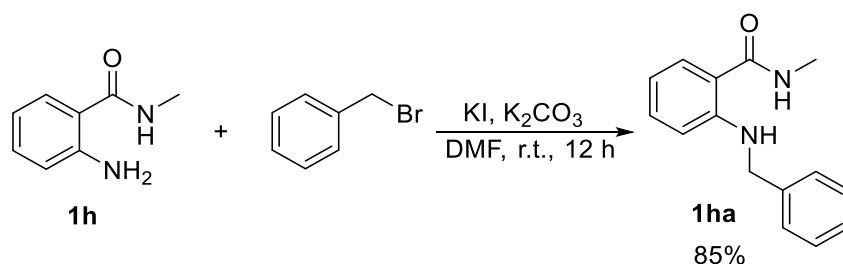

### 3.3 General Procedure for the Preparation of 2-(benzylamino)-N-methylbenzamide (2am)<sup>3</sup>

A mixture of 2-amino-6-bromobenzonitrile **2u** (980 mg, 5 mmol), phenylboronic acid **S-1** (6 mmol), PdCl<sub>2</sub>(PPh<sub>3</sub>)<sub>2</sub> (35.0 mg, 0.05 mmol), and Cs<sub>2</sub>CO<sub>3</sub> (4.89 g, 15.0 mmol) in CH<sub>3</sub>CN (20 mL) and H<sub>2</sub>O (1.6 mL) was stirred at 80 °C under an argon atmosphere for 12 h. After completion, the reaction mixture was cooled to room temperature and diluted with ethyl acetate (50 mL). The organic layer was washed with brine (3 × 30 mL), dried over anhydrous MgSO<sub>4</sub>, and concentrated under reduced pressure. The crude product was purified by column chromatography on silica gel using a mixture of dichloromethane and petroleum ether (1:1, v/v) to afford the desired product **2am**.

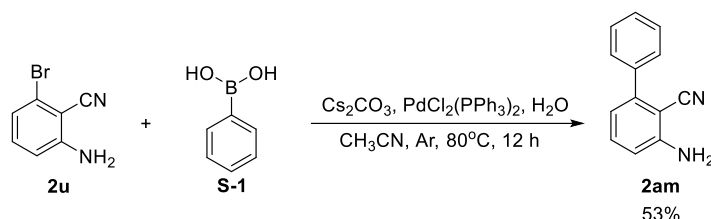

### 3.4 Characterization of Starting Materials

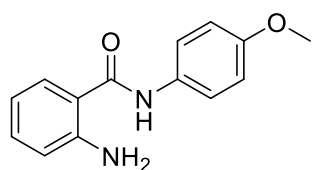

**2-amino-N-(4-methoxyphenyl)benzamide (1j):**<sup>1</sup> According to general procedure, the crude residue was purified by flash chromatography (petroleum ether/ethyl acetate = 6:1) to give the product as a white solid (610.6 mg, 84 %). <sup>1</sup>H NMR (500 MHz, DMSO-*d*<sub>6</sub>) δ 9.86 (s, 1H), 7.60 (d, *J* = 7.5 Hz, 3H), 7.18 (t, *J* = 7.6 Hz, 1H), 6.91 (d, *J* = 8.7 Hz, 2H), 6.74 (d, *J* = 8.1 Hz, 1H), 6.58 (t, *J* = 7.4 Hz, 1H), 6.30 (s, 2H), 3.74 (s, 3H). <sup>13</sup>C {<sup>1</sup>H} NMR (126 MHz, DMSO-*d*<sub>6</sub>) δ 167.5, 155.4, 149.6, 132.2, 131.9, 128.5, 122.2, 116.3, 115.4, 114.6, 113.6, 55.2.

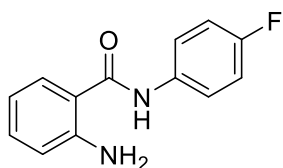

**2-amino-N-(4-fluorophenyl)benzamide (1k):**<sup>1</sup> According to general procedure, the crude residue was purified by flash chromatography (petroleum ether/ethyl acetate = 6:1) to give the product as a white solid (462.7 mg, 67 %). <sup>1</sup>H NMR (500 MHz, DMSO-*d*<sub>6</sub>, TMS) δ 10.03 (s, 1H), 7.77-7.65 (m, 2H), 7.61 (d, *J* = 7.9 Hz, 1H), 7.18 (dt, *J* = 17.2, 8.4 Hz, 3H), 6.74 (d, *J* = 8.3 Hz, 1H), 6.58 (t, *J* = 7.5 Hz, 1H), 6.31 (s, 2H). <sup>13</sup>C {<sup>1</sup>H} NMR (126 MHz, DMSO-*d*<sub>6</sub>, TMS) δ 167.7, 158.1 (d, *J* = 240.7 Hz), 149.7, 135.6 (d, *J* = 2.5 Hz), 132.1, 128.6, 122.4 (d, *J* = 7.6 Hz), 116.4, 115.0 (d, *J* = 22.7 Hz), 115.0, 114.7.

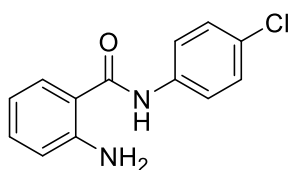

**2-amino-N-(4-chlorophenyl)benzamide (1l):**<sup>1</sup> According to general procedure, the crude residue was purified by flash chromatography (petroleum ether/ethyl acetate = 6:1) to give the product as a white solid (473.7 mg, 64 %). <sup>1</sup>H NMR (500 MHz, DMSO-*d*<sub>6</sub>, TMS) δ 10.09 (s, 1H), 7.74

(d,  $J = 8.1$  Hz, 2H), 7.61 (d,  $J = 7.9$  Hz, 1H), 7.38 (d,  $J = 8.1$  Hz, 2H), 7.20 (t,  $J = 7.6$  Hz, 1H), 6.75 (d,  $J = 8.2$  Hz, 1H), 6.58 (t,  $J = 7.3$  Hz, 1H), 6.32 (s, 2H).  $^{13}\text{C}\{^1\text{H}\}$  NMR (126 MHz, DMSO- $d_6$ , TMS)  $\delta$  167.9, 149.8, 138.2, 132.3, 128.7, 128.4, 126.9, 122.0, 116.4, 114.9, 114.7.

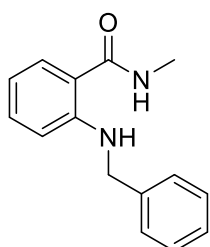

**2-(benzylamino)-N-methylbenzamide (1ha):**<sup>2</sup> According to general procedure, the crude residue was purified by flash chromatography ( $\text{CH}_2\text{Cl}_2$ ) to give the product as a white solid (1.32 g, 84%).  $^1\text{H}$  NMR (500 MHz, DMSO- $d_6$ , TMS)  $\delta$  8.29 (s, 2H), 7.52 (d,  $J = 7.7$  Hz, 1H), 7.34 (d,  $J = 3.3$  Hz, 4H), 7.25 (s, 1H), 7.20 (t,  $J = 7.6$  Hz, 1H), 6.62 (d,  $J = 8.3$  Hz, 1H), 6.55 (t,  $J = 7.5$  Hz, 1H), 4.36 (d,  $J = 5.6$  Hz, 2H), 2.74 (d,  $J = 3.8$  Hz, 3H).  $^{13}\text{C}\{^1\text{H}\}$  NMR (126 MHz, DMSO- $d_6$ , TMS)  $\delta$  169.6, 148.9, 139.6, 132.1, 128.5, 128.1, 127.1, 126.8, 115.3, 114.4, 111.5, 46.1, 26.0.

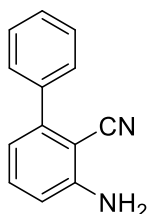

**3-amino-[1,1'-biphenyl]-2-carbonitrile (2am):**<sup>3</sup> According to general procedure, the crude residue was purified by flash chromatography ( $\text{CH}_2\text{Cl}_2$ / petroleum ether=1:1) to give the product as a colourless solid (514 mg, 53%).  $^1\text{H}$  NMR (500 MHz, DMSO- $d_6$ , TMS)  $\delta$  7.50-7.41 (m, 5H), 7.34 (t,  $J = 7.9$  Hz, 1H), 6.81 (d,  $J = 8.3$  Hz, 1H), 6.60 (d,  $J = 7.3$  Hz, 1H), 6.09 (s, 2H).  $^{13}\text{C}\{^1\text{H}\}$  NMR (126 MHz, DMSO- $d_6$ , TMS)  $\delta$  153.2, 145.5, 139.5, 134.0, 129.0, 128.9, 128.8, 118.0, 117.2, 114.4, 93.2.

## 4. Experimental Procedures

### 4.1 General Procedure for the Synthesis of 2-methyl-2,3-dihydroquinazolin-4(1H)-ones from the Reaction of 2-aminobenzamide and Calcium Carbide mediated by $\text{K}_2\text{S}$ and KOH

A 15 mL closed reactor was loaded with 2-aminobenzamide (1 mmol, 136.2 mg, 1.0 equiv.), water (3 mmol, 54  $\mu\text{L}$ , 3.0 equiv.), and 3 mL of *n*-butanol. The mixture was stirred at room temperature for 5 minutes. Next, KOH (1 mmol, 56.1 mg, 1.0 equiv.),  $\text{K}_2\text{S}$  (3 mmol, 330.8 mg, 3.0 equiv.), and freshly powdered calcium carbide (2.0 mmol, 131 mg, 2.0 equiv.) were added to the reactor. Subsequently, the reactor was placed in a constant-temperature sand bath, and the reaction mixture was vigorously stirred for 5 h. Upon completion of the reaction, the solvent of the reaction mixture was removed by a high-boiling-point rotary evaporator. The obtained crude product was dissolved in 3-5 mL ethyl acetate. Finally, the crude product was purified by column chromatography on silica gel with a  $\text{MeOH}/\text{CH}_2\text{Cl}_2$  ratio ranging from 1/20 to 1/100, affording the desired product 2-methyl-2,3-dihydroquinazolin-4(1H)-ones.

### 4.2 General procedure for the Synthesis of 2-methyl-2,3-dihydroquinazolin-4(1H)-ones from the Reaction of 2-aminobenzonitrile and Calcium Carbide mediated by $\text{K}_2\text{S}$ and KOH

A 15 mL closed reactor was charged with 2-aminobenzonitrile (1 mmol, 118.1 mg, 1.0 equiv.), water (6 mmol, 108  $\mu$ L, 6.0 equiv.), NaOH (2.5 mmol, 100 mg, 2.5 equiv.), and 3 mL of *n*-butanol. The mixture was stirred at room temperature for 5 minutes. Subsequently, K<sub>2</sub>S (3 mmol, 330.8 mg, 3.0 equiv.) and freshly powdered calcium carbide (2.0 mmol, 131 mg, 2.0 equiv.) were added. Then, the reactor was placed in a constant-temperature sand bath, and the reaction mixture was vigorously stirred for 8 h. Upon completion of the reaction, the solvent of the reaction mixture was removed by a high-boiling-point rotary evaporator. The obtained crude product was dissolved in 3-5 mL ethyl acetate. Finally, the crude product was purified by column chromatography on silica gel with a MeOH/CH<sub>2</sub>Cl<sub>2</sub> ratio ranging from 1/20 to 1/100, affording the desired product 2-methyl-2,3-dihydroquinazolin-4(1H)-ones.

#### **4.3 General Procedure for in-situ Oxidation Reaction of 2-methyl-2,3-dihydroquinazolin-4(1H)-ones to 2-methylquinazolin-4(3H)-ones**

Upon completion of the reaction for the synthesis of 2-methyl-2,3-dihydroquinazolin-4(1H)-ones, the reaction solution is centrifuged. Subsequently, the supernatant is transferred to a 25 mL round-bottom flask. Next, KMnO<sub>4</sub> (1.0 equiv.) is added to the round-bottom flask, and the reaction mixture is vigorously agitated at room temperature for 2 h. After the reaction is complete, the reaction solution is filtered, and the solvent is removed from the filtrate via vacuum distillation to yield the crude product. Ultimately, the crude product is purified through column chromatography on silica gel using MeOH/CH<sub>2</sub>Cl<sub>2</sub> solvent system in a ratio of 1:30, affording the desired product 2-methylquinazolin-4(3H)-one.

#### **4.4 General procedure for the Synthesis of the Natural Product Schizocummunin 5aa**

A 50-mL sealed reactor was loaded with 2-aminobenzonitrile (10 mmol, 1.18 g, 1 equiv.), distilled water (60 mmol, 1 mL, 6 equiv.), NaOH (25 mmol, 1.0 g, 2.5 equiv.), and 30 mL of *n*-butanol. The mixture was stirred at room temperature for 5 minutes. Subsequently, K<sub>2</sub>S (30 mmol, 3.3 g, 3 equiv.) and freshly powdered calcium carbide (20 mmol, 1.31 g, 2 equiv.) were added to the reaction vessel. The reactor was then placed in a constant-temperature sand bath, and the reaction mixture was vigorously stirred for 8 hours. Upon completion of the reaction, the mixture was carefully transferred to a 50-mL round-bottom flask, and KMnO<sub>4</sub> (1 equiv.) was introduced, and stirred vigorously at room temperature for 2 hours. After the reaction, the reaction mixture was filtered, and the solvent in the filtrate was removed by vacuum distillation to obtain the crude product. The crude product was then purified by column chromatography on silica gel using a MeOH/CH<sub>2</sub>Cl<sub>2</sub> ratio of 1:30. The solvent was subsequently removed by decompression distillation to yield compound **4a** (2-methylquinazolin-4(3H)-ones). Next, a 50-mL round-bottom flask was charged with **4a** (1.57 g, 1 equiv.), isatin (1.44 g,

1 equiv.), and 20 mL of acetic acid. The mixture was refluxed at 120 °C for 4 hours. After the reaction was completed, the mixture was filtered to obtain orange precipitates. The precipitates were washed with methanol (50 mL) and dried in an oven to afford the desired product **5aa**.

## 5. Mechanistic Investigations

### 5.1 HRMS Analysis Results of the Reaction Solution for the Synthesis of 2-methyl-2,3-dihydroquinazolin-4(1H)-one

A 15 mL closed reactor was loaded with **1a** (1 mmol), H<sub>2</sub>C<sub>2</sub> (2 mmol), NaHS (3 mmol), and 3 mL of *n*-butanol. The reaction mixture was stirred at 110 °C for 5 h. After that, the reaction solution was analyzed by HRMS, which confirmed the presence of mass-spectrum peaks corresponding to thioacetaldehyde (Figure S1, a). Moreover, there was a mass peak at *m/z* 197.0755 corresponding to intermediate compounds **I** and **II** (Figure S1, b). These intermediate compounds were formed when *o*-aminobenzamide attacked thioacetaldehyde. Additionally, another mass peak at *m/z* 197.0755 was observed, corresponding to imines **III** and **IV** (Figure S1, c). These imines were produced from intermediate compounds **I** and **II** via the elimination of H<sub>2</sub>S. In the accompanying figures, the red columns mark the molecular ion peak related to each identified compound.

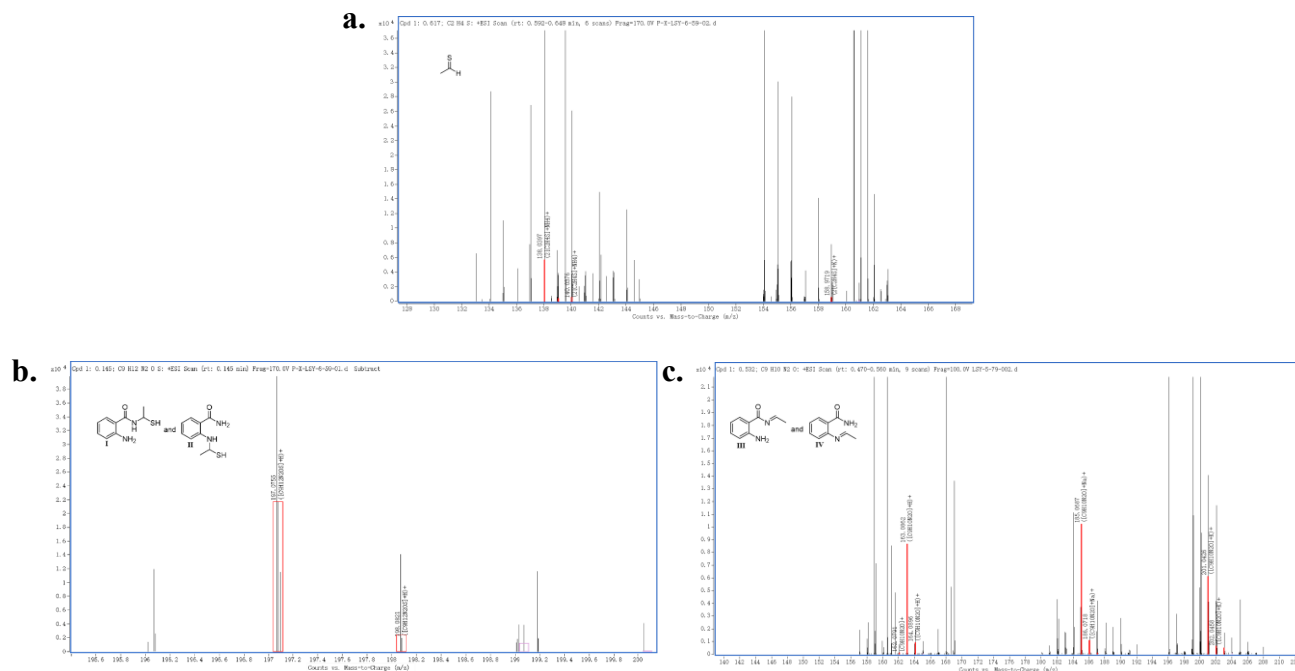

**Figure S1 a.** The ion peak of thioacetaldehyde; **b.** The ion peak of the adducts (Compounds **I** and **II**); **c.** The ion peak of imine (intermediates **III** and **IV**) corresponding to compounds **I** and **II**



## 5.2 Quantitative NMR Results of the Competitive Reaction between Substrates **1h** and **1o**

A 15 mL closed reactor was charged with 2-amino-N-methylbenzamide **1h** (0.5 mmol, 75 mg), 2-(methylamino)benzamide **1o** (0.5 mmol, 75 mg), water (3 mmol, 54  $\mu$ L), and 3 mL of *n*-butanol. The mixture was stirred at room temperature for 5 minutes. Next, KOH (1 mmol, 56.1 mg), K<sub>2</sub>S (3 mmol, 330.8 mg), and freshly powdered calcium carbide (2.0 mmol, 131 mg) were added. Subsequently, the reactor was placed in a constant-temperature sand bath, and the reaction mixture was vigorously agitated for 5 h. Upon completion of the reaction, 14.1 mg of pyrazine was weighed as the internal standard and thoroughly dissolved in the reaction solution. Then, 50  $\mu$ L of the mixture solution was taken for nuclear magnetic resonance quantification (using DMSO-*d*<sub>6</sub>). The quantitative nuclear magnetic resonance results of products **3h** and **3o** are presented in Figure S2.

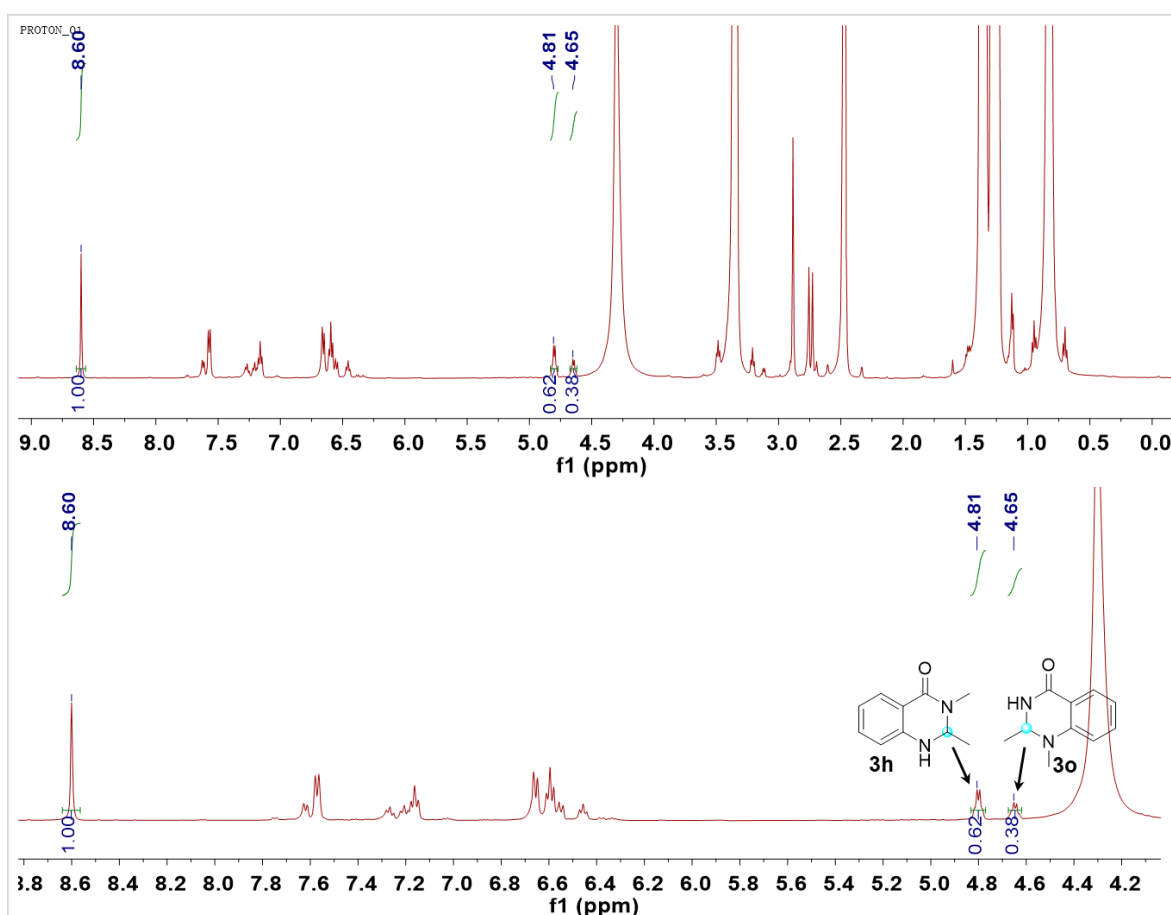

**Figure S2** The nuclear magnetic resonance quantitative results of compounds **3h** and **3o**

## 5.3 In-situ FTIR Spectroscopy Monitoring of the Synthesis of Dihydropyrazolone **3a** from the Reaction between *o*-aminobenzamide and CaC<sub>2</sub>

A METTLER TOLEDO ReactIR™ reactor was cleaned and dried for 10 minutes before use. Initially, 20 mL of *n*-butanol was introduced, and the solvent peak was subtracted after the infrared

peak stabilized. Subsequently, 2-aminobenzamide (1 mmol, 136.2 mg), KOH (1 mmol, 56 mg), and K<sub>2</sub>S (3 mmol, 330.8 mg) was added. IR spectra of the mixture solution were continuously collected in the range of 650-3000 cm<sup>-1</sup>, with each spectrum comprising 44 scans at a resolution of 4 cm<sup>-1</sup>, collected every 15 seconds. After the mixture reaction solution was monitored by in-situ IR for 5 minutes, 0.4 MPa of acetylene was introduced into the reactor. Subsequently, the reaction solution was continuously monitored by in situ IR for an additional 5 h in 110 °C. During this period, it was observed that the peak corresponding to the C=N bond (1674 cm<sup>-1</sup>) gradually increased and then decreased, while new peaks corresponding to the C-N bond of secondary amine (1125 cm<sup>-1</sup>) and the C-N bond of the amide (1569 cm<sup>-1</sup>) appeared (Figure 2).

## 6. Characterization of Products

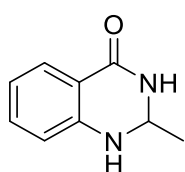

**2-methyl-2,3-dihydroquinazolin-4(1H)-one (3a)**<sup>4</sup>: According to general procedure, the crude residue was purified by flash chromatography (MeOH/CH<sub>2</sub>Cl<sub>2</sub> = 1/40) to give the product as a white solid (154 mg, 95%), m.p.= 182-184 °C; <sup>1</sup>H NMR (500 MHz, DMSO-*d*<sub>6</sub>, TMS) δ 7.89 (s, 1H), 7.59 (d, *J* = 7.6 Hz, 1H), 7.23 (t, *J* = 7.6 Hz, 1H), 6.71 – 6.65 (m, 2H), 6.60 (s, 1H), 4.82 (q, *J* = 5.7 Hz, 1H), 1.31 (d, *J* = 5.8 Hz, 3H). <sup>13</sup>C{<sup>1</sup>H} NMR (126 MHz, DMSO-*d*<sub>6</sub>, TMS) δ 164.1, 148.8, 133.1, 127.5, 117.2, 115.2, 114.3, 60.9, 21.3. HRMS (ESI-TOF) *m/z*: [M+Na]<sup>+</sup> Calcd for C<sub>9</sub>H<sub>10</sub>N<sub>2</sub>ONa 185.0685; Found: 185.0685.

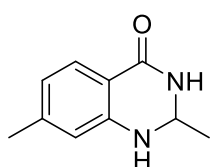

**2,7-dimethyl-2,3-dihydroquinazolin-4(1H)-one (3b)**: According to general procedure, the crude residue was purified by flash chromatography (MeOH/CH<sub>2</sub>Cl<sub>2</sub> = 1/40) to give the product as a white solid (171 mg, 97%), m.p.= 222-224 °C; <sup>1</sup>H NMR (500 MHz, DMSO-*d*<sub>6</sub>, TMS) δ 7.78 (s, 1H), 7.47 (d, *J* = 7.6 Hz, 1H), 6.49 (d, *J* = 7.7 Hz, 3H), 4.79 (q, *J* = 5.4 Hz, 1H), 2.20 (s, 3H), 1.30 (d, *J* = 5.1 Hz, 3H). <sup>13</sup>C{<sup>1</sup>H} NMR (126 MHz, DMSO-*d*<sub>6</sub>, TMS) δ 164.2, 148.7, 143.0, 127.5, 118.4, 114.3, 112.9, 60.9, 21.4, 21.3. HRMS (ESI-TOF) *m/z*: [M+H]<sup>+</sup> Calcd for C<sub>10</sub>H<sub>13</sub>N<sub>2</sub>O 177.1022; Found: 177.1024.

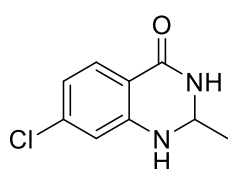

**7-chloro-2-methyl-2,3-dihydroquinazolin-4(1H)-one (3c)**: According to general procedure, the crude residue was purified by flash chromatography (MeOH/CH<sub>2</sub>Cl<sub>2</sub> = 1/40) to give the product as a white solid (191 mg, 97%), m.p.= 146-148 °C; <sup>1</sup>H NMR (500 MHz, DMSO-*d*<sub>6</sub>, TMS) δ 8.00 (s, 1H), 7.57 (d, *J* = 8.3 Hz, 1H), 6.89 (s, 1H), 6.72 (s, 1H), 6.68 (d, *J* = 8.3 Hz, 1H), 4.86 (q, *J* = 5.6 Hz, 1H), 1.31 (d, *J* = 5.8 Hz, 3H). <sup>13</sup>C{<sup>1</sup>H} NMR (126 MHz, DMSO-*d*<sub>6</sub>, TMS) δ 163.2, 149.6, 137.6, 129.4, 117.0, 113.8, 113.3, 60.8, 21.4. HRMS (ESI-TOF) *m/z*: [M+H]<sup>+</sup> Calcd for C<sub>9</sub>H<sub>10</sub>ClN<sub>2</sub>O 197.0476; Found: 197.0476.

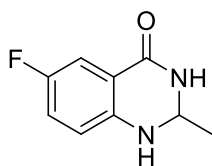

**6-fluoro-2-methyl-2,3-dihydroquinazolin-4(1H)-one (3d):** According to general procedure, the crude residue was purified by flash chromatography (MeOH/CH<sub>2</sub>Cl<sub>2</sub> = 1/40) to give the product as a white solid (126 mg, 70%), m.p.= 214-216 °C; <sup>1</sup>H NMR (500 MHz, DMSO-*d*<sub>6</sub>, TMS) δ 8.07 (s, 1H), 7.29 (dd, *J* = 9.0, 3.0 Hz, 1H), 7.13 (td, *J* = 8.7, 3.1 Hz, 1H), 6.72 (dd, *J* = 8.8, 4.5 Hz, 1H), 6.59 (s, 1H), 4.80 (q, *J* = 5.7 Hz, 1H), 1.31 (d, *J* = 5.7 Hz, 3H). <sup>13</sup>C{<sup>1</sup>H} NMR (126 MHz, DMSO-*d*<sub>6</sub>, TMS) δ 163.2 (d, *J* = 2.5 Hz), 155.7, 153.8, 145.4 (d, *J* = 1.3 Hz), 120.5 (d, *J* = 23.9 Hz), 116.0 (t, *J* = 7.6 Hz), 112.6 (d, *J* = 22.7 Hz), 61.0, 21.0. <sup>19</sup>F NMR (470 MHz, DMSO-*d*<sub>6</sub>, TMS) δ -126.73. HRMS (ESI-TOF) *m/z*: [M+H]<sup>+</sup> Calcd for C<sub>9</sub>H<sub>10</sub>FN<sub>2</sub>O 181.0771; Found: 181.0772.

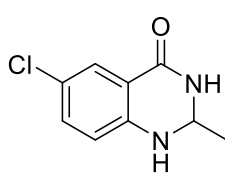

**6-chloro-2-methyl-2,3-dihydroquinazolin-4(1H)-one (3e):** According to general procedure, the crude residue was purified by flash chromatography (MeOH/CH<sub>2</sub>Cl<sub>2</sub> = 1/40) to give the product as a white solid (165 mg, 84%), m.p.= 225-227 °C; <sup>1</sup>H NMR (500 MHz, DMSO-*d*<sub>6</sub>, TMS) δ 8.07 (s, 1H), 7.51 (d, *J* = 2.6 Hz, 1H), 7.26 (dd, *J* = 8.6, 2.6 Hz, 1H), 6.84 (s, 1H), 6.72 (d, *J* = 8.7 Hz, 1H), 4.84 (q, *J* = 5.7 Hz, 1H), 1.31 (d, *J* = 5.8 Hz, 3H). <sup>13</sup>C{<sup>1</sup>H} NMR (126 MHz, DMSO-*d*<sub>6</sub>, TMS) δ 163.2, 147.8, 133.2, 126.9, 121.1, 116.7, 116.7, 61.2, 21.6. HRMS (ESI-TOF) *m/z*: [M+H]<sup>+</sup> Calcd for C<sub>9</sub>H<sub>10</sub>ClN<sub>2</sub>O 197.0476; Found: 197.0476.

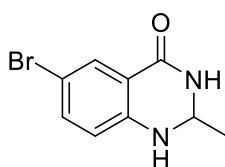

**6-bromo-2-methyl-2,3-dihydroquinazolin-4(1H)-one (3f):** According to general procedure, the crude residue was purified by flash chromatography (MeOH/CH<sub>2</sub>Cl<sub>2</sub> = 1/40) to give the product as a white solid (231 mg, 96%), m.p.= 236-238 °C; <sup>1</sup>H NMR (500 MHz, DMSO-*d*<sub>6</sub>, TMS) δ 8.06 (s, 1H), 7.64 (d, *J* = 2.4 Hz, 1H), 7.37 (dd, *J* = 8.6, 2.4 Hz, 1H), 6.86 (s, 1H), 6.67 (d, *J* = 8.6 Hz, 1H), 4.84 (q, *J* = 5.7 Hz, 1H), 1.31 (d, *J* = 5.8 Hz, 3H). <sup>13</sup>C{<sup>1</sup>H} NMR (126 MHz, DMSO-*d*<sub>6</sub>, TMS) δ 162.7, 147.7, 135.5, 129.4, 116.8, 116.7, 108.0, 60.7, 21.2. HRMS (ESI-TOF) *m/z*: [M+H]<sup>+</sup> Calcd for C<sub>9</sub>H<sub>10</sub>BrN<sub>2</sub>O 240.9971; Found: 240.9966.

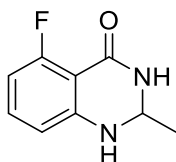

**5-fluoro-2-methyl-2,3-dihydroquinazolin-4(1H)-one (3g):** According to general procedure, the crude residue was purified by flash chromatography (MeOH/CH<sub>2</sub>Cl<sub>2</sub> = 1/40) to give the product as a white solid (128 mg, 71%). m.p.=234-236 °C; <sup>1</sup>H NMR (500 MHz, DMSO-*d*<sub>6</sub>, TMS) δ 8.06 (s, 1H), 7.28 (dd, *J* = 9.0, 3.0 Hz, 1H), 7.12 (td, *J* = 8.7, 3.1 Hz, 1H), 6.71 (dd, *J* = 8.9, 4.5 Hz, 1H), 6.58 (s, 1H), 4.79 (q, *J* = 5.7 Hz, 1H), 1.30 (d, *J* = 5.8 Hz, 3H). <sup>13</sup>C{<sup>1</sup>H} NMR (126 MHz, DMSO-*d*<sub>6</sub>, TMS) δ 163.2 (d, *J* = 5 Hz), 154.7 (d, *J* = 930 Hz), 145.4 (d, *J* = 5 Hz), 120.5 (d, *J* = 95 Hz), 116.03, 115.97, 112.6 (d, *J* = 95 Hz), 61.0, 21.0. <sup>19</sup>F NMR (470 MHz, DMSO-*d*<sub>6</sub>, TMS) δ -114.48. HRMS (ESI-TOF) *m/z*: [M+Na]<sup>+</sup> Calcd for C<sub>9</sub>H<sub>9</sub>FN<sub>2</sub>ONa

203.0591; Found: 203.0594.

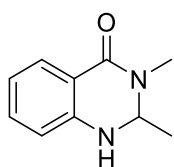

**2,3-dimethyl-2,3-dihydroquinazolin-4(1H)-one (3h)<sup>5</sup>:** According to general procedure, the crude residue was purified by flash chromatography (MeOH/CH<sub>2</sub>Cl<sub>2</sub> = 1/40) to give the product as a white solid (144 mg, 82%). m.p.=75-77 °C; <sup>1</sup>H NMR (500 MHz, DMSO-*d*<sub>6</sub>, TMS) δ 7.60 (d, *J* = 7.7 Hz, 1H), 7.27 – 7.17 (m, 1H), 6.71 (s, 1H), 6.66 (dd, *J* = 12.6, 7.6 Hz, 2H), 4.84 (q, *J* = 5.9 Hz, 1H), 2.91 (s, 3H), 1.29 (d, *J* = 5.9 Hz, 3H). <sup>13</sup>C{<sup>1</sup>H} NMR (126 MHz, DMSO-*d*<sub>6</sub>, TMS) δ 162.1, 146.8, 133.0, 127.4, 116.9, 114.5, 114.4, 66.4, 30.8, 19.2. HRMS (ESI-TOF) *m/z*: [M+H]<sup>+</sup> Calcd for C<sub>10</sub>H<sub>13</sub>N<sub>2</sub>O 177.1022; Found: 177.1025.

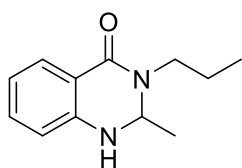

**2-methyl-3-propyl-2,3-dihydroquinazolin-4(1H)-one (3i):** According to general procedure, the crude residue was purified by flash chromatography (MeOH/CH<sub>2</sub>Cl<sub>2</sub> = 1/40) to give the product as a yellow oil (202 mg, 99%). <sup>1</sup>H NMR (500 MHz, DMSO-*d*<sub>6</sub>, TMS) δ 7.60 (d, *J* = 7.6 Hz, 1H), 7.22 (t, *J* = 7.6 Hz, 1H), 6.68 – 6.65 (m, 3H), 4.85 – 4.82 (m, 1H), 3.77 – 3.71 (m, 1H), 2.92 – 2.87 (m, 1H), 1.61 – 1.47 (m, 2H), 1.27 (d, *J* = 5.8 Hz, 3H), 0.87 (t, *J* = 7.3 Hz, 3H). <sup>13</sup>C{<sup>1</sup>H} NMR (126 MHz, DMSO-*d*<sub>6</sub>, TMS) δ 161.6, 146.7, 132.9, 127.4, 116.9, 115.0, 114.5, 64.7, 44.9, 21.1, 19.9, 11.2. HRMS (ESI-TOF) *m/z*: [M+Na]<sup>+</sup> Calcd for C<sub>12</sub>H<sub>16</sub>N<sub>2</sub>ONa 227.1155; Found: 227.1152.

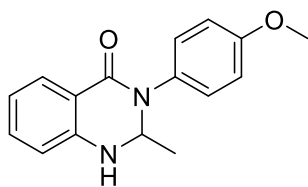

**3-(4-methoxyphenyl)-2-methyl-2,3-dihydroquinazolin-4(1H)-one (3j)<sup>6</sup>:** According to general procedure, the crude residue was purified by flash chromatography (MeOH/CH<sub>2</sub>Cl<sub>2</sub> = 1/40) to give the product as a white solid (260 mg, 97%). <sup>1</sup>H NMR (500 MHz, DMSO-*d*<sub>6</sub>, TMS) δ 7.67 (d, *J* = 7.6 Hz, 1H), 7.30 (t, *J* = 7.0 Hz, 1H), 7.22 (d, *J* = 8.8 Hz, 2H), 6.98 (d, *J* = 8.8 Hz, 2H), 6.93 (s, 1H), 6.77 (d, *J* = 8.1 Hz, 1H), 6.72 (t, *J* = 7.5 Hz, 1H), 5.18 (d, *J* = 5.6 Hz, 1H), 3.78 (s, 3H), 1.24 (d, *J* = 5.7 Hz, 3H). <sup>13</sup>C{<sup>1</sup>H} NMR (126 MHz, DMSO-*d*<sub>6</sub>, TMS) δ 162.3, 157.8, 147.3, 133.4, 132.9, 129.1, 127.9, 117.3, 115.0, 114.7, 114.1, 67.7, 55.3, 20.2. HRMS (ESI-TOF) *m/z*: [M+K]<sup>+</sup> Calcd for C<sub>16</sub>H<sub>16</sub>N<sub>2</sub>O<sub>2</sub>K 307.0843; Found: 307.0846.

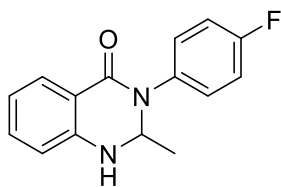

**3-(4-fluorophenyl)-2-methyl-2,3-dihydroquinazolin-4(1H)-one (3k):** According to general procedure, the crude residue was purified by flash chromatography (MeOH/CH<sub>2</sub>Cl<sub>2</sub> = 1/40) to give the product as a white solid (230 mg, 90%). <sup>1</sup>H NMR (500 MHz, DMSO-*d*<sub>6</sub>, TMS) δ 7.68 (d, *J* = 7.8 Hz, 1H), 7.41 – 7.34 (m, 2H), 7.32 (t, *J* = 7.6 Hz, 1H), 7.26 (t, *J* = 8.7 Hz, 2H), 6.99 (s, 1H), 6.78 (d, *J* = 7.9 Hz, 1H), 6.74 (t, *J* = 7.2 Hz, 1H), 5.30 – 5.18 (m, 1H), 1.24 (dd, *J* = 5.9, 2.2 Hz, 3H). <sup>13</sup>C{<sup>1</sup>H} NMR (126 MHz, DMSO-*d*<sub>6</sub>, TMS) δ 162.3, 160.4 (d, *J* = 244.4 Hz), 147.4, 136.3 (d, *J* = 2.5 Hz), 133.61, 129.9 (d, *J* = 7.6 Hz), 128.0, 117.4, 115.8, 115.6, 114.8, 67.5, 20.2. <sup>19</sup>F NMR (470 MHz,

DMSO-*d*<sub>6</sub>, TMS)  $\delta$  -112.66. HRMS (ESI-TOF)  $m/z$ :  $[M+Na]^+$  Calcd for C<sub>15</sub>H<sub>13</sub>FN<sub>2</sub>ONa 279.0904; Found: 279.0910.

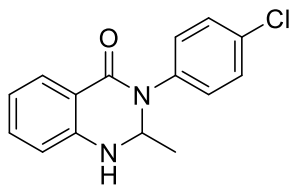

**3-(4-chlorophenyl)-2-methyl-2,3-dihydroquinazolin-4(1H)-one (3l)<sup>7</sup>:**

According to general procedure, the crude residue was purified by flash chromatography (MeOH/CH<sub>2</sub>Cl<sub>2</sub> = 1/40) to give the product as a white solid (254 mg, 93%). <sup>1</sup>H NMR (500 MHz, DMSO-*d*<sub>6</sub>, TMS)  $\delta$  7.68 (d,  $J$  = 7.7 Hz, 1H), 7.49 (d,  $J$  = 8.2 Hz, 2H), 7.37 (d,  $J$  = 8.2 Hz, 2H), 7.32 (t,  $J$  = 7.7 Hz, 1H), 7.01 (s, 1H), 6.79 (d,  $J$  = 8.2 Hz, 1H), 6.74 (t,  $J$  = 7.5 Hz, 1H), 5.28 (q,  $J$  = 5.7 Hz, 1H), 1.26 (d,  $J$  = 5.9 Hz, 3H). <sup>13</sup>C{<sup>1</sup>H} NMR (126 MHz, DMSO-*d*<sub>6</sub>, TMS)  $\delta$  162.2, 147.3, 139.0, 133.7, 130.9, 129.4, 128.9, 128.0, 117.4, 114.9, 114.7, 67.4, 20.2. HRMS (ESI-TOF)  $m/z$ :  $[M+H]^+$  Calcd for C<sub>15</sub>H<sub>14</sub>ClN<sub>2</sub>O 273.0789; Found: 273.0792.

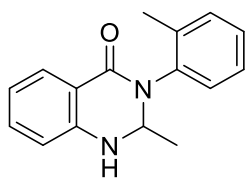

**2-methyl-3-(o-tolyl)-2,3-dihydroquinazolin-4(1H)-one (3m)<sup>8</sup>:**

According to general procedure, the crude residue was purified by flash chromatography (MeOH/CH<sub>2</sub>Cl<sub>2</sub> = 1/40) to give the product as a white solid (237 mg, 94%). m.p.=193-195 °C; <sup>1</sup>H NMR (500 MHz, DMSO-*d*<sub>6</sub>, TMS)  $\delta$  7.67 (t,  $J$  = 7.4 Hz, 1H), 7.36 – 7.17 (m, 5H), 6.94 (d,  $J$  = 14.2 Hz, 1H), 6.80 (d,  $J$  = 8.1 Hz, 1H), 6.74 (t,  $J$  = 7.4 Hz, 1H), 4.97 (q,  $J$  = 6.1, 5.1 Hz, 1H), 2.22 (s, 2H), 2.16 (s, 1H), 1.28 (d,  $J$  = 5.9 Hz, 2H), 1.13 (d,  $J$  = 5.9 Hz, 1H). <sup>13</sup>C{<sup>1</sup>H} NMR (126 MHz, DMSO-*d*<sub>6</sub>, TMS)  $\delta$  162.0, 161.6, 148.1, 147.5, 139.0, 138.9, 136.9, 135.6, 133.4, 133.4, 130.8, 130.4, 130.1, 128.0, 127.9, 127.8, 127.7, 127.4, 126.8, 126.3, 117.5, 117.4, 115.4, 115.1, 114.9, 114.5, 67.4, 67.4, 20.0, 18.1, 17.5. HRMS (ESI-TOF)  $m/z$ :  $[M+H]^+$  Calcd for C<sub>16</sub>H<sub>17</sub>N<sub>2</sub>O 253.1335; Found: 253.1338.

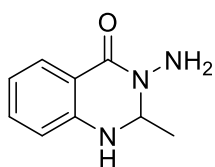

**3-amino-2-methyl-2,3-dihydroquinazolin-4(1H)-one (3n)<sup>9</sup>:**

According to general procedure, the crude residue was purified by flash chromatography (MeOH/CH<sub>2</sub>Cl<sub>2</sub> = 1/40) to give the product as a white solid (120 mg, 68%). m.p.=95-97 °C; <sup>1</sup>H NMR (500 MHz, DMSO-*d*<sub>6</sub>, TMS)  $\delta$  7.59 (d,  $J$  = 7.7 Hz, 1H), 7.23 (t,  $J$  = 7.5 Hz, 1H), 6.78 (s, 1H), 6.67 (d,  $J$  = 7.4 Hz, 2H), 4.86 (m, 3H), 1.35 (d,  $J$  = 5.1 Hz, 3H). <sup>13</sup>C{<sup>1</sup>H} NMR (126 MHz, DMSO-*d*<sub>6</sub>, TMS)  $\delta$  162.4, 146.7, 133.0, 127.1, 117.0, 114.2, 113.7, 68.4, 19.3. HRMS (ESI-TOF)  $m/z$ :  $[M+H]^+$  Calcd for C<sub>9</sub>H<sub>12</sub>N<sub>3</sub>O 178.0975; Found: 178.0976.

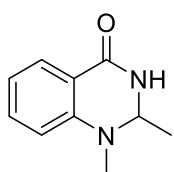

**1,2-dimethyl-2,3-dihydroquinazolin-4(1H)-one (3o)<sup>10</sup>:**

According to general procedure, the crude residue was purified by flash chromatography (MeOH/CH<sub>2</sub>Cl<sub>2</sub> = 1/40) to give the product as a white solid (169 mg, 96%). m.p.=138-140 °C; <sup>1</sup>H NMR (500 MHz, DMSO-*d*<sub>6</sub>, TMS)  $\delta$  8.18 (s, 1H), 7.67 (d,  $J$  = 7.6 Hz, 1H), 7.45 – 7.31 (m, 1H), 6.75 (t,  $J$  = 7.4 Hz, 1H), 6.69 (d,  $J$  = 8.2 Hz, 1H), 4.69 (dd,  $J$  = 5.9, 3.9 Hz, 1H), 2.81 (s, 3H),

1.18 (d,  $J = 5.9$  Hz, 3H).  $^{13}\text{C}\{^1\text{H}\}$  NMR (126 MHz, DMSO- $d_6$ , TMS)  $\delta$  162.4, 147.3, 133.6, 127.4, 117.0, 116.1, 112.3, 66.7, 34.2, 18.0. HRMS (ESI-TOF)  $m/z$ :  $[\text{M}+\text{H}]^+$  Calcd for  $\text{C}_{10}\text{H}_{13}\text{N}_2\text{O}$  177.1022; Found: 177.1023.

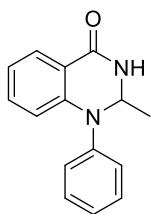

**2-methyl-1-phenyl-2,3-dihydroquinazolin-4(1H)-one (3p)**<sup>11</sup>: According to general procedure, the crude residue was purified by flash chromatography (MeOH/ $\text{CH}_2\text{Cl}_2 = 1/30$ ) to give the product as a white solid (164 mg, 69%). m.p.=148-150 °C;  $^1\text{H}$  NMR (500 MHz, DMSO- $d_6$ , TMS)  $\delta$  8.31 (s, 1H), 7.80 (d,  $J = 7.7$  Hz, 1H), 7.42 (t,  $J = 7.9$  Hz, 2H), 7.31 (t,  $J = 7.8$  Hz, 1H), 7.23-7.20 (m, 3H), 6.92 (t,  $J = 7.5$  Hz, 1H), 6.62 (d,  $J = 8.4$  Hz, 1H), 5.23 – 5.13 (m, 1H), 1.31 (d,  $J = 6.0$  Hz, 3H).  $^{13}\text{C}\{^1\text{H}\}$  NMR (126 MHz, DMSO- $d_6$ , TMS)  $\delta$  162.42, 145.31, 143.99, 133.05, 129.82, 127.74, 125.10, 124.30, 119.75, 118.75, 117.09, 66.52, 21.47. HRMS (ESI-TOF)  $m/z$ :  $[\text{M}+\text{Na}]^+$  Calcd for  $\text{C}_{15}\text{H}_{14}\text{N}_2\text{ONa}$  261.0998; Found: 261.0992.

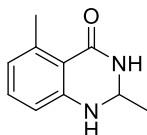

**2,5-dimethyl-2,3-dihydroquinazolin-4(1H)-one (3s)**: According to general procedure, the crude residue was purified by flash chromatography (MeOH/ $\text{CH}_2\text{Cl}_2 = 1/40$ ) to give the product as a white solid (172 mg, 98%). m.p.=208-210 °C;  $^1\text{H}$  NMR (500 MHz, DMSO- $d_6$ , TMS)  $\delta$  7.78 (s, 1H), 7.06 (t,  $J = 7.7$  Hz, 1H), 6.56 (d,  $J = 8.1$  Hz, 1H), 6.46 (d,  $J = 8.2$  Hz, 2H), 4.67 (q,  $J = 5.7$  Hz, 1H), 1.28 (d,  $J = 5.7$  Hz, 3H).  $^{13}\text{C}\{^1\text{H}\}$  NMR (126 MHz, DMSO- $d_6$ , TMS)  $\delta$  164.8, 150.2, 140.4, 131.8, 121.0, 113.9, 112.8, 60.2, 21.9, 20.8. HRMS (ESI-TOF)  $m/z$ :  $[\text{M}+\text{K}]^+$  Calcd for  $\text{C}_{10}\text{H}_{12}\text{N}_2\text{OK}$  215.0587; Found: 215.0596.

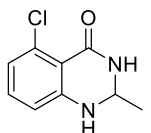

**5-chloro-2-methyl-2,3-dihydroquinazolin-4(1H)-one (3t)**: According to general procedure, the crude residue was purified by flash chromatography (MeOH/ $\text{CH}_2\text{Cl}_2 = 1/40$ ) to give the product as a white solid (180 mg, 82%). m.p.=240-242 °C;  $^1\text{H}$  NMR (500 MHz, DMSO- $d_6$ , TMS)  $\delta$  8.04 (s, 1H), 7.15 (t,  $J = 8.0$  Hz, 1H), 6.92 (s, 1H), 6.69 (d,  $J = 7.9$  Hz, 2H), 4.70 (q,  $J = 5.7$  Hz, 1H), 1.29 (d,  $J = 5.8$  Hz, 3H).  $^{13}\text{C}\{^1\text{H}\}$  NMR (126 MHz, DMSO- $d_6$ , TMS)  $\delta$  161.7, 151.6, 133.9, 132.7, 120.2, 113.8, 112.4, 59.9, 20.4. HRMS (ESI-TOF)  $m/z$ :  $[\text{M}+\text{Na}]^+$  Calcd for  $\text{C}_9\text{H}_9\text{ClN}_2\text{ONa}$  219.0296; Found: 219.0296.

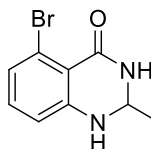

**5-bromo-2-methyl-2,3-dihydroquinazolin-4(1H)-one (3u)**: According to general procedure, the crude residue was purified by flash chromatography (MeOH/ $\text{CH}_2\text{Cl}_2 = 1/40$ ) to give the product as a white solid (228 mg, 86%). m.p.=247-250 °C;  $^1\text{H}$  NMR (500 MHz, DMSO- $d_6$ , TMS)  $\delta$  8.05 (s, 1H), 7.64 (d,  $J = 2.2$  Hz, 1H), 7.37 (dd,  $J = 8.6, 2.4$  Hz, 1H), 6.85 (s, 1H), 6.67 (d,  $J = 8.6$  Hz, 1H), 4.83 (q,  $J = 5.7$  Hz, 1H), 1.31 (d,  $J = 5.7$  Hz, 3H).  $^{13}\text{C}$  NMR (126 MHz, DMSO- $d_6$ , TMS)  $\delta$  162.7, 147.7, 135.5, 129.4, 116.7, 116.7, 107.9, 60.7, 21.2. HRMS (ESI-TOF)  $m/z$ :  $[\text{M}+\text{H}]^+$  Calcd for  $\text{C}_9\text{H}_{10}\text{BrN}_2\text{O}$  240.9971; Found: 240.9966.

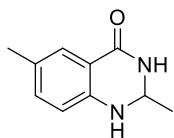

**2,6-dimethyl-2,3-dihydroquinazolin-4(1H)-one (3v)**<sup>12</sup>: According to general procedure, the crude residue was purified by flash chromatography (MeOH/CH<sub>2</sub>Cl<sub>2</sub> = 1/40) to give the product as a white solid (174 mg, 99%). m.p.=208-210 °C; <sup>1</sup>H NMR (500 MHz, DMSO-*d*<sub>6</sub>, TMS) δ 7.83 (s, 1H), 7.40 (s, 1H), 7.06 (d, *J* = 8.2 Hz, 1H), 6.61 (d, *J* = 8.2 Hz, 1H), 6.40 (s, 1H), 4.77 (q, *J* = 5.6 Hz, 1H), 2.18 (s, 3H), 1.29 (d, *J* = 5.7 Hz, 3H). <sup>13</sup>C{<sup>1</sup>H} NMR (126 MHz, DMSO-*d*<sub>6</sub>, TMS) δ 164.2, 146.6, 133.8, 127.3, 125.8, 115.2, 114.4, 61.0, 21.2, 20.1. HRMS (ESI-TOF) *m/z*: [M+H]<sup>+</sup> Calcd for C<sub>10</sub>H<sub>13</sub>N<sub>2</sub>O 177.1022; Found:177.1019.

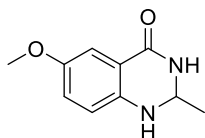

**6-methoxy-2-methyl-2,3-dihydroquinazolin-4(1H)-one (3w)**: According to general procedure, the crude residue was purified by flash chromatography (MeOH/CH<sub>2</sub>Cl<sub>2</sub> = 1/40) to give the product as a white solid (186 mg, 97%). m.p.=212-214 °C; <sup>1</sup>H NMR (500 MHz, DMSO-*d*<sub>6</sub>, TMS) δ 7.92 (s, 1H), 7.14 (d, *J* = 2.8 Hz, 1H), 6.91 (dd, *J* = 8.7, 1.7 Hz, 1H), 6.67 (d, *J* = 8.7 Hz, 1H), 6.24 (s, 1H), 4.75 (q, *J* = 5.5 Hz, 1H), 3.68 (s, 3H), 1.29 (d, *J* = 4.9 Hz, 3H). <sup>13</sup>C{<sup>1</sup>H} NMR (126 MHz, DMSO-*d*<sub>6</sub>, TMS) δ 164.1, 151.5, 143.2, 121.1, 116.0, 115.9, 110.1, 61.2, 55.3, 21.0. HRMS (ESI-TOF) *m/z*: [M+Na]<sup>+</sup> Calcd for C<sub>10</sub>H<sub>12</sub>N<sub>2</sub>O<sub>2</sub>Na 215.0791; Found:215.0791.

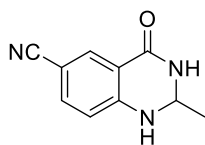

**2-methyl-4-oxo-1,2,3,4-tetrahydroquinazoline-6-carbonitrile (3x)**: According to general procedure, the crude residue was purified by flash chromatography (MeOH/CH<sub>2</sub>Cl<sub>2</sub> = 1/40) to give the product as a white solid (135 mg, 72%). m.p.=215-217 °C; <sup>1</sup>H NMR (500 MHz, DMSO-*d*<sub>6</sub>, TMS) δ 8.19 (s, 1H), 7.87 (s, 1H), 7.62 (s, 1H), 7.58 (d, *J* = 8.3 Hz, 1H), 6.76 (d, *J* = 8.5 Hz, 1H), 4.97 (q, *J* = 6.9 Hz, 1H), 1.33 (d, *J* = 4.9 Hz, 3H). <sup>13</sup>C{<sup>1</sup>H} NMR (126 MHz, DMSO-*d*<sub>6</sub>, TMS) δ 162.0, 151.2, 136.2, 132.1, 119.5, 114.9, 114.3, 97.7, 60.5, 21.8. HRMS (ESI-TOF) *m/z*: [M+H]<sup>+</sup> Calcd for C<sub>10</sub>H<sub>10</sub>N<sub>3</sub>O 188.0818; Found:188.0820.

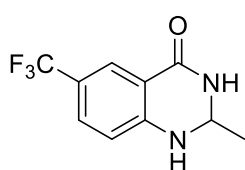

**2-methyl-6-(trifluoromethyl)-2,3-dihydroquinazolin-4(1H)-one (3z)**: According to general procedure, the crude residue was purified by flash chromatography (MeOH/CH<sub>2</sub>Cl<sub>2</sub> = 1/40) to give the product as a white solid (172 mg, 75%). m.p.=255-257 °C; <sup>1</sup>H NMR (500 MHz, DMSO-*d*<sub>6</sub>, TMS) δ 8.20 (s, 1H), 8.04 (s, 1H), 7.77 (d, *J* = 8.2 Hz, 1H), 7.40 (s, 1H), 6.77 – 6.65 (m, 1H), 4.93 (d, *J* = 5.3 Hz, 1H), 1.33 (d, *J* = 5.5 Hz, 3H). <sup>13</sup>C{<sup>1</sup>H} NMR (126 MHz, DMSO-*d*<sub>6</sub>, TMS) δ 167.3, 163.3, 151.7, 134.3, 129.9, 127.6, 119.1, 113.9, 113.7, 60.7, 21.8. <sup>19</sup>F NMR (470 MHz, DMSO-*d*<sub>6</sub>, TMS) δ -60.94. HRMS (ESI-TOF) *m/z*: [M+Na]<sup>+</sup> Calcd for C<sub>10</sub>H<sub>9</sub>F<sub>3</sub>N<sub>2</sub>ONa 253.0559; Found: 253.0559.

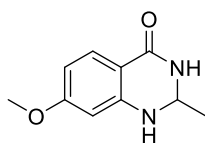

**7-methoxy-2-methyl-2,3-dihydroquinazolin-4(1H)-one (3ab)**: According to general procedure, the crude residue was purified by flash chromatography (MeOH/CH<sub>2</sub>Cl<sub>2</sub> = 1/40) to give the product as a white solid (186 mg, 97%). m.p.=229-231 °C; <sup>1</sup>H NMR (500 MHz, DMSO-*d*<sub>6</sub>, TMS) δ 7.69 (s, 1H), 7.52 (d, *J* = 8.4 Hz, 1H), 6.61

(s, 1H), 6.26 (d,  $J$  = 8.6 Hz, 1H), 6.19 (s, 1H), 4.80 (d,  $J$  = 5.2 Hz, 1H), 3.71 (s, 3H), 1.30 (d,  $J$  = 4.7 Hz, 3H).  $^{13}\text{C}\{^1\text{H}\}$  NMR (126 MHz, DMSO- $d_6$ , TMS)  $\delta$  164.1, 163.3, 150.4, 129.3, 108.6, 104.8, 97.7, 61.0, 55.0, 21.4. HRMS (ESI-TOF)  $m/z$ :  $[\text{M}+\text{K}]^+$  Calcd for  $\text{C}_{10}\text{H}_{12}\text{N}_2\text{O}_2\text{K}$  231.0530; Found: 231.0526.

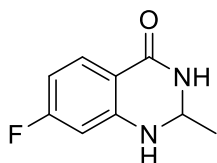

**7-fluoro-2-methyl-2,3-dihydroquinazolin-4(1H)-one (3ac)**: According to general

procedure, the crude residue was purified by flash chromatography (MeOH/ $\text{CH}_2\text{Cl}_2$  = 1/40) to give the product as a white solid (122 mg, 68%). m.p.=149-151  $^\circ\text{C}$ ;  $^1\text{H}$

NMR (500 MHz, DMSO- $d_6$ , TMS)  $\delta$  7.89 (s, 1H), 7.59 (t,  $J$  = 7.5 Hz, 1H), 6.87 (s, 1H), 6.41 (td,  $J$  = 11.0, 3.9 Hz, 2H), 4.82 (q,  $J$  = 5.7 Hz, 1H), 1.27 (d,  $J$  = 5.8 Hz, 3H).  $^{13}\text{C}\{^1\text{H}\}$  NMR (126 MHz, DMSO- $d_6$ , TMS)  $\delta$  165.5 ( $J$  = 139.4 Hz), 163.3, 150.6 ( $J$  = 12.6 Hz), 130.4 ( $J$  = 12.6 Hz), 111.8 ( $J$  = 2.5 Hz), 104.4 ( $J$  = 12.6 Hz), 100.0 ( $J$  = 25.2 Hz), 60.9, 21.4.  $^{19}\text{F}$  NMR (470 MHz, DMSO- $d_6$ , TMS)  $\delta$  -103.91. HRMS (ESI-TOF)  $m/z$ :  $[\text{M}+\text{K}]^+$  Calcd for  $\text{C}_9\text{H}_9\text{FN}_2\text{OK}$  219.0330; Found: 219.0334.

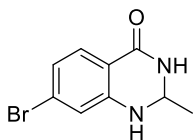

**7-bromo-2-methyl-2,3-dihydroquinazolin-4(1H)-one (3ad)**: According to general

procedure, the crude residue was purified by flash chromatography (MeOH/ $\text{CH}_2\text{Cl}_2$  = 1/40) to give the product as a white solid (200 mg, 83%). m.p.=135-137  $^\circ\text{C}$ ;  $^1\text{H}$

NMR (500 MHz, DMSO- $d_6$ , TMS)  $\delta$  8.01 (s, 1H), 7.50 (d,  $J$  = 8.2 Hz, 1H), 6.97 – 6.77 (m, 3H), 4.86 (q,  $J$  = 5.8 Hz, 1H), 1.31 (d,  $J$  = 5.8 Hz, 3H).  $^{13}\text{C}\{^1\text{H}\}$  NMR (126 MHz, DMSO- $d_6$ , TMS)  $\delta$  163.2, 149.7, 129.5, 126.6, 119.9, 116.3, 114.1, 60.8, 21.4. HRMS (ESI-TOF)  $m/z$ :  $[\text{M}+\text{H}]^+$  Calcd for  $\text{C}_9\text{H}_{10}\text{BrN}_2\text{O}$  240.9971; Found: 240.9980.

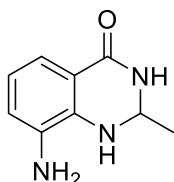

**8-amino-2-methyl-2,3-dihydroquinazolin-4(1H)-one (3ae)**: According to general

procedure, the crude residue was purified by flash chromatography (MeOH/ $\text{CH}_2\text{Cl}_2$  = 1/40) to give the product as a white solid (166 mg, 94%). m.p.=141-143  $^\circ\text{C}$ ;  $^1\text{H}$  NMR

(500 MHz, DMSO- $d_6$ , TMS)  $\delta$  7.83 (s, 1H), 6.99 (d,  $J$  = 7.8 Hz, 1H), 6.66 (d,  $J$  = 7.6 Hz, 1H), 6.53 (t,  $J$  = 7.7 Hz, 1H), 5.55 (s, 1H), 4.77 (m, 3H), 1.36 (d,  $J$  = 5.8 Hz, 3H).  $^{13}\text{C}\{^1\text{H}\}$  NMR (126 MHz, DMSO- $d_6$ , TMS)  $\delta$  165.0, 135.8, 135.2, 118.0, 117.0, 116.3, 115.7, 60.8, 21.0. HRMS (ESI-TOF)  $m/z$ :  $[\text{M}+\text{H}]^+$  Calcd for  $\text{C}_9\text{H}_{12}\text{N}_3\text{O}$  178.0975; Found: 178.0975.

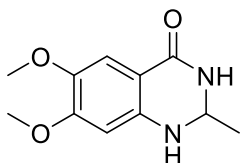

**6,7-dimethoxy-2-methyl-2,3-dihydroquinazolin-4(1H)-one (3af)**: According

to general procedure, the crude residue was purified by flash chromatography (MeOH/ $\text{CH}_2\text{Cl}_2$  = 1/40) to give the product as a white solid (206 mg, 93%).

m.p.=251-253  $^\circ\text{C}$ ;  $^1\text{H}$  NMR (500 MHz, DMSO- $d_6$ , TMS)  $\delta$  7.66 (s, 1H), 7.09 (s,

1H), 6.29-6.25 (m, 2H), 4.75 (q,  $J$  = 5.7 Hz, 1H), 3.73 (s, 3H), 3.67 (s, 3H), 1.29 (d,  $J$  = 5.7 Hz, 3H).  $^{13}\text{C}\{^1\text{H}\}$  NMR (126 MHz, DMSO- $d_6$ , TMS)  $\delta$  164.4, 153.7, 144.6, 141.6, 110.0, 106.9, 97.9, 61.4, 55.8, 55.4, 21.1. HRMS (ESI-TOF)  $m/z$ :  $[\text{M}+\text{H}]^+$  Calcd for  $\text{C}_{11}\text{H}_{15}\text{N}_2\text{O}_3$  223.1077; Found: 223.1062.



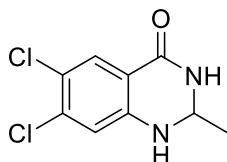

**6,7-dichloro-2-methyl-2,3-dihydroquinazolin-4(1H)-one (3ag)**: According to general procedure, the crude residue was purified by flash chromatography (MeOH/CH<sub>2</sub>Cl<sub>2</sub> = 1/40) to give the product as a white solid (187 mg, 81%).

m.p.=249-251 °C; <sup>1</sup>H NMR (500 MHz, DMSO-*d*<sub>6</sub>, TMS) δ 8.17 (d, *J* = 3.2 Hz, 1H), 7.65 (s, 1H), 7.04 (s, 1H), 6.91 (s, 1H), 4.88 (q, *J* = 5.5 Hz, 1H), 1.31 (d, *J* = 5.7 Hz, 3H). <sup>13</sup>C{<sup>1</sup>H} NMR (126 MHz, DMSO-*d*<sub>6</sub>, TMS) δ 162.0, 148.0, 135.3, 128.7, 118.5, 115.5, 115.2, 60.8, 21.4. HRMS (ESI-TOF) *m/z*: [M+H]<sup>+</sup> Calcd for C<sub>9</sub>H<sub>9</sub>Cl<sub>2</sub>N<sub>2</sub>O 231.0086; Found:231.0087.

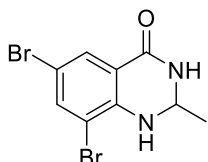

**6,8-dibromo-2-methyl-2,3-dihydroquinazolin-4(1H)-one (3ah)**: According to general procedure, the crude residue was purified by flash chromatography (MeOH/CH<sub>2</sub>Cl<sub>2</sub> = 1/80) to give the product as a white solid (266 mg, 83%).

m.p.=203-205 °C; <sup>1</sup>H NMR (500 MHz, DMSO-*d*<sub>6</sub>, TMS) δ 8.27 (s, 1H), 7.76 (s, 1H), 7.70 (s, 1H), 6.37 (s, 1H), 4.88 (m, 1H), 1.37 (d, *J* = 5.3 Hz, 3H). <sup>13</sup>C{<sup>1</sup>H} NMR (126 MHz, DMSO-*d*<sub>6</sub>, TMS) δ 161.4, 144.6, 137.6, 129.3, 117.8, 108.7, 107.8, 60.8, 21.7. HRMS (ESI-TOF) *m/z*: [M+H]<sup>+</sup> Calcd for C<sub>9</sub>H<sub>9</sub>Br<sub>2</sub>N<sub>2</sub>O 318.0976; Found:318.0976.

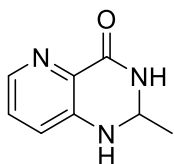

**2-methyl-2,3-dihydropyrido[3,2-d]pyrimidin-4(1H)-one (3ai)**: According to general procedure, the crude residue was purified by flash chromatography (MeOH/CH<sub>2</sub>Cl<sub>2</sub> = 1/40) to give the product as a white solid (112 mg, 69%).

m.p.=217-219 °C; <sup>1</sup>H NMR (500 MHz, DMSO-*d*<sub>6</sub>, TMS) δ 8.11 (s, 1H), 7.75 (dd, *J* = 8.3, 4.3 Hz, 1H), 7.23-7.21 (m, 1H), 7.11 (dd, *J* = 8.3, 1.5 Hz, 1H), 6.80 (s, 1H), 4.87 (q, *J* = 5.8 Hz, 1H), 1.32 (d, *J* = 5.8 Hz, 3H). <sup>13</sup>C{<sup>1</sup>H} NMR (126 MHz, DMSO-*d*<sub>6</sub>, TMS) δ 162.6, 148.4, 134.8, 132.6, 127.1, 122.2, 60.5, 21.2. HRMS (ESI-TOF) *m/z*: [M+K]<sup>+</sup> Calcd for C<sub>8</sub>H<sub>9</sub>N<sub>3</sub>OK 202.0377; Found:202.0383.

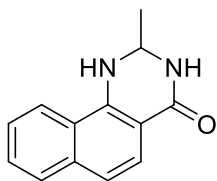

**2-methyl-2,3-dihydrobenzo[h]quinazolin-4(1H)-one (3ak)**: According to general procedure, the crude residue was purified by flash chromatography (MeOH/CH<sub>2</sub>Cl<sub>2</sub> = 1/40) to give the product as a white solid (208 mg, 98%).

m.p.=250-252 °C; <sup>1</sup>H NMR (500 MHz, DMSO-*d*<sub>6</sub>, TMS) δ 8.23 (d, *J* = 8.3 Hz, 1H), 7.90 (s, 1H), 7.79 (d, *J* = 8.6 Hz, 1H), 7.69 (d, *J* = 8.5 Hz, 1H), 7.58 – 7.53 (m, 1H), 7.49 (td, *J* = 7.6, 6.9, 1.1 Hz, 1H), 7.23 (s, 1H), 7.17 (d, *J* = 8.6 Hz, 1H), 4.98 (q, *J* = 5.8 Hz, 1H), 1.47 (d, *J* = 5.8 Hz, 3H). <sup>13</sup>C{<sup>1</sup>H} NMR (126 MHz, DMSO-*d*<sub>6</sub>, TMS) δ 164.7, 145.7, 135.8, 128.2, 128.0, 125.0, 124.0, 122.9, 122.1, 116.5, 108.9, 61.0, 21.1. HRMS (ESI-TOF) *m/z*: [M+K]<sup>+</sup> Calcd for C<sub>13</sub>H<sub>12</sub>N<sub>2</sub>OK 251.0581; Found: 251.0583.

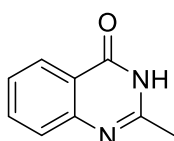

**2-methylquinazolin-4(3H)-one (4a)**<sup>13</sup>: According to general procedure, the crude residue was purified by flash chromatography (MeOH/CH<sub>2</sub>Cl<sub>2</sub> = 1/30) to give the product as a white solid (157 mg, 95%); <sup>1</sup>H NMR (500 MHz, DMSO-*d*<sub>6</sub>, TMS) δ 8.05

(d, *J* = 7.7 Hz, 1H), 7.71 (t, *J* = 6.9 Hz, 1H), 7.53 (d, *J* = 7.7 Hz, 1H), 7.39 (t, *J* = 6.9 Hz, 1H), 4.76 (br,

s, 1H), 2.33 (s, 3H).  $^{13}\text{C}\{^1\text{H}\}$  NMR (126 MHz, DMSO- $d_6$ , TMS)  $\delta$  162.9, 155.7, 149.2, 133.7, 126.3, 125.7, 125.3, 120.7, 22.0 HRMS (ESI-TOF)  $m/z$ :  $[\text{M}+\text{Na}]^+$  Calcd for  $\text{C}_9\text{H}_8\text{N}_2\text{ONa}$  183.0529; Found: 183.0537.

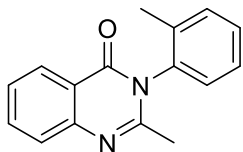

**2-methyl-3-(o-tolyl)quinazolin-4(3H)-one (4m)**<sup>14</sup>: According to general procedure, the crude residue was purified by flash chromatography (MeOH/ $\text{CH}_2\text{Cl}_2$  = 1/30) to give the product as a white solid (235 mg, 94%);  $^1\text{H}$  NMR (500 MHz, Chloroform- $d$ , TMS)  $\delta$  8.29 (d,  $J$  = 7.4 Hz, 1H), 7.78 (t,  $J$  = 6.9 Hz, 1H), 7.70 (d,  $J$  = 8.0 Hz, 1H), 7.47 (t,  $J$  = 7.1 Hz, 1H), 7.43 – 7.34 (m, 3H), 7.16 (d,  $J$  = 7.2 Hz, 1H), 2.19 (s, 3H), 2.13 (s, 3H).  $^{13}\text{C}\{^1\text{H}\}$  NMR (126 MHz, Chloroform- $d$ , TMS)  $\delta$  161.8, 154.4, 147.8, 136.9, 135.5, 134.7, 131.6, 129.7, 128.0, 127.8, 127.2, 126.9, 126.7, 120.9, 24.0, 17.5. HRMS (ESI-TOF)  $m/z$ :  $[\text{M}+\text{H}]^+$  Calcd for  $\text{C}_{16}\text{H}_{14}\text{N}_2\text{O}$  251.1179; Found: 251.1172.

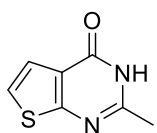

**2-methylthieno[2,3-d]pyrimidin-4(3H)-one (4q)**<sup>15</sup>: According to general procedure, the crude residue was purified by flash chromatography (MeOH/ $\text{CH}_2\text{Cl}_2$  = 1/100) to give the product as a white solid (88 mg, 53%);  $^1\text{H}$  NMR (500 MHz, DMSO- $d_6$ , TMS)  $\delta$  12.38 (s, 1H), 7.46 (d,  $J$  = 5.8 Hz, 1H), 7.32 (d,  $J$  = 5.8 Hz, 1H), 2.36 (s, 3H).  $^{13}\text{C}\{^1\text{H}\}$  NMR (126 MHz, DMSO- $d_6$ , TMS)  $\delta$  164.8, 158.3, 155.1, 122.5, 121.4, 117.1, 21.0. HRMS (ESI-TOF)  $m/z$ :  $[\text{2M}+\text{Na}]^+$  Calcd for  $\text{C}_{14}\text{H}_{12}\text{N}_4\text{O}_2\text{S}_2\text{Na}$  355.0294; Found: 355.0293;  $[\text{M}+\text{K}]^+$  Calcd for  $\text{C}_7\text{H}_6\text{N}_2\text{OSK}$  204.9832; Found: 204.9838.

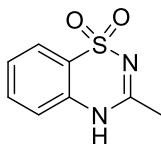

**methyl-4H-benzo[e][1,2,4]thiadiazine 1,1-dioxide (4r)**<sup>16</sup>: According to general procedure, the crude residue was purified by flash chromatography (MeOH/ $\text{CH}_2\text{Cl}_2$  = 1/30) to give the product as a white solid (139 mg, 71%).  $^1\text{H}$  NMR (500 MHz, DMSO- $d_6$ , TMS)  $\delta$  12.02 (s, 1H), 7.78 (d,  $J$  = 7.6 Hz, 1H), 7.66 (t,  $J$  = 7.8 Hz, 1H), 7.42 (t,  $J$  = 7.1 Hz, 1H), 7.29 (d,  $J$  = 8.2 Hz, 1H), 2.30 (s, 3H).  $^{13}\text{C}\{^1\text{H}\}$  NMR (126 MHz, DMSO- $d_6$ , TMS)  $\delta$  157.2, 135.2, 133.0, 126.2, 123.4, 121.0, 117.2, 22.6. HRMS (ESI-TOF)  $m/z$ :  $[\text{2M}+\text{Na}]^+$  Calcd for  $\text{C}_{16}\text{H}_{16}\text{N}_4\text{O}_4\text{S}_2\text{Na}$  415.0505; Found: 415.0503;  $[\text{M}+\text{H}]^+$  Calcd for  $\text{C}_8\text{H}_9\text{N}_2\text{O}_2\text{S}$  197.0379; Found: 197.0383.

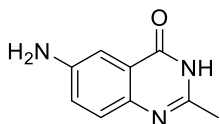

**amino-2-methylquinazolin-4(3H)-one (4y')**<sup>17</sup>: According to general procedure, the crude residue was purified by flash chromatography (MeOH/ $\text{CH}_2\text{Cl}_2$  = 1/40) to give the product as a white solid (124 mg, 71%). m.p.=252-255 °C;  $^1\text{H}$  NMR (500 MHz, DMSO- $d_6$ , TMS)  $\delta$  11.76 (s, 1H), 7.27 (d,  $J$  = 8.6 Hz, 1H), 7.13 (d,  $J$  = 2.5 Hz, 1H), 7.02 (dd,  $J$  = 8.6, 2.6 Hz, 1H), 5.47 (s, 2H), 2.25 (s, 3H).  $^{13}\text{C}\{^1\text{H}\}$  NMR (126 MHz, DMSO- $d_6$ , TMS)  $\delta$  161.7, 148.7, 147.1, 140.0, 127.3, 122.2, 121.5, 106.2, 21.0. HRMS (ESI-TOF)  $m/z$ :  $[\text{2M}+\text{K}]^+$  Calcd for  $\text{C}_{18}\text{H}_{18}\text{N}_6\text{O}_2\text{K}$  389.1123; Found: 389.1123;  $[\text{M}+\text{H}]^+$  Calcd for  $\text{C}_9\text{H}_{10}\text{N}_3\text{O}$  176.0818; Found: 176.0818.

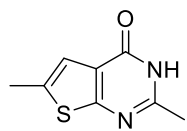

**2,6-dimethylthieno[2,3-d]pyrimidin-4(3H)-one (4aj)<sup>18</sup>:** According to general procedure, the crude residue was purified by flash chromatography (MeOH/CH<sub>2</sub>Cl<sub>2</sub> = 1/60) to give the product as a grey solid (110 mg, 61%); <sup>1</sup>H NMR (500 MHz, DMSO-*d*<sub>6</sub>, TMS) δ 12.30 (s, 1H), 7.01 (s, 1H), 2.47 (s, 3H), 2.33 (s, 3H). <sup>13</sup>C{<sup>1</sup>H} NMR (126 MHz, DMSO-*d*<sub>6</sub>, TMS) δ 163.7, 157.8, 154.4, 135.7, 122.4, 118.8, 20.9, 15.4. HRMS (ESI-TOF) *m/z*: [2M+Na]<sup>+</sup> Calcd for C<sub>16</sub>H<sub>16</sub>N<sub>4</sub>O<sub>2</sub>S<sub>2</sub>Na 383.0607; Found: 383.0614; [M+K]<sup>+</sup> Calcd for C<sub>8</sub>H<sub>8</sub>N<sub>2</sub>OSK 218.9989; Found: 218.9991.

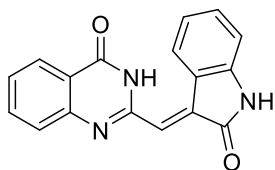

**(E)-2-((2-oxoindolin-3-ylidene)methyl)quinazolin-4(3H)-one (5aa)<sup>2</sup>:**

According to general procedure, the product as an orange solid (2.75 g, 97%), <sup>1</sup>H NMR (500 MHz, DMSO-*d*<sub>6</sub>, TMS) δ 14.39 (s, 1H), 11.49 (s, 1H), 8.17 (d, *J* = 6.4 Hz, 1H), 7.93 (d, *J* = 7.2 Hz, 1H), 7.90 – 7.85 (m, 1H), 7.79 (d, *J* = 7.8 Hz, 1H), 7.62–7.57 (m, 2H), 7.36 (t, *J* = 7.3 Hz, 1H), 7.08 (t, *J* = 7.3 Hz, 1H), 6.93 (d, *J* = 7.4 Hz, 1H). <sup>13</sup>C{<sup>1</sup>H} NMR (126 MHz, DMSO-*d*<sub>6</sub>, TMS) δ 168.8, 160.8, 150.4, 148.9, 141.6, 134.6, 134.3, 131.6, 130.0, 128.0, 127.9, 126.0, 123.2, 122.6, 121.9, 121.5, 110.5. HRMS (ESI-TOF) *m/z*: [2M+H]<sup>+</sup> Calcd for C<sub>34</sub>H<sub>23</sub>N<sub>6</sub>O<sub>4</sub> 579.1775; Found: 579.1772; [M+K]<sup>+</sup> Calcd for C<sub>17</sub>H<sub>11</sub>N<sub>3</sub>O<sub>2</sub>K 328.0483; Found: 328.0484.

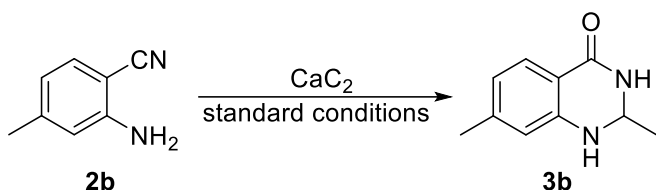

**2,7-dimethyl-2,3-dihydroquinazolin-4(1H)-one (3b):** According to general procedure, the crude residue was purified by flash chromatography (MeOH/CH<sub>2</sub>Cl<sub>2</sub> = 1/40) to give the product as a white solid (173 mg, 98%)

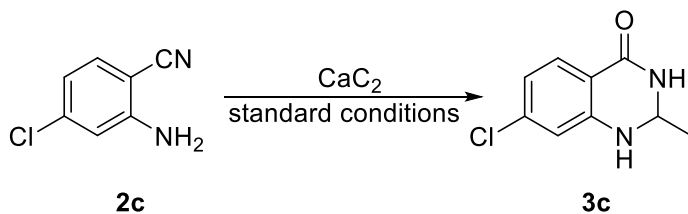

**7-chloro-2-methyl-2,3-dihydroquinazolin-4(1H)-one (3c):** According to general procedure, the crude residue was purified by flash chromatography (MeOH/CH<sub>2</sub>Cl<sub>2</sub> = 1/40) to give the product as a white solid (154 mg, 78%)

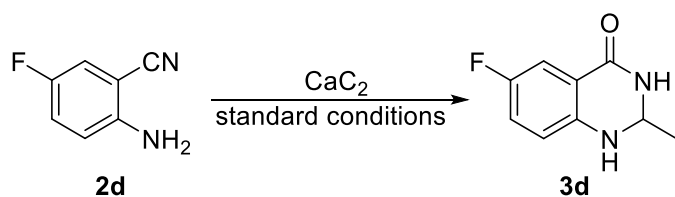

**6-fluoro-2-methyl-2,3-dihydroquinazolin-4(1H)-one (3d)**: According to general procedure, the crude residue was purified by flash chromatography (MeOH/CH<sub>2</sub>Cl<sub>2</sub> = 1/40) to give the product as a white solid (140 mg, 78%)

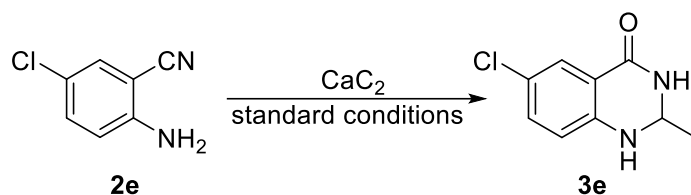

**6-chloro-2-methyl-2,3-dihydroquinazolin-4(1H)-one (3e)**: According to general procedure, the crude residue was purified by flash chromatography (MeOH/CH<sub>2</sub>Cl<sub>2</sub> = 1/40) to give the product as a white solid (159 mg, 81%)

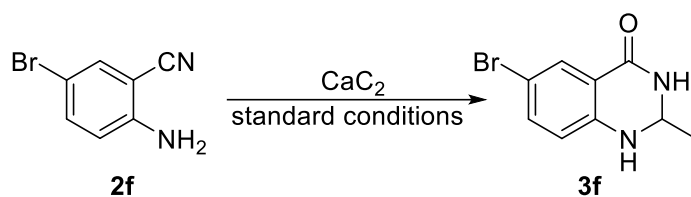

**6-bromo-2-methyl-2,3-dihydroquinazolin-4(1H)-one (3f)**: According to general procedure, the crude residue was purified by flash chromatography (MeOH/CH<sub>2</sub>Cl<sub>2</sub> = 1/40) to give the product as a white solid (202 mg, 84%)

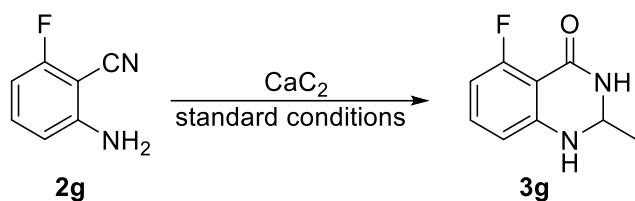

**5-fluoro-2-methyl-2,3-dihydroquinazolin-4(1H)-one (3g)**: According to general procedure, the crude residue was purified by flash chromatography (MeOH/CH<sub>2</sub>Cl<sub>2</sub> = 1/40) to give the product as a white solid (139 mg, 77%)

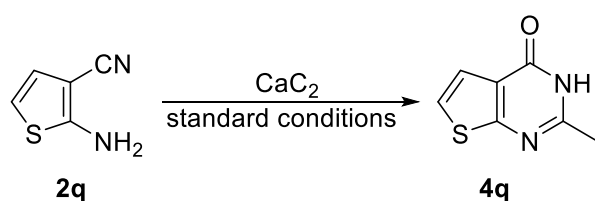

**2-methylthieno[2,3-d]pyrimidin-4(3H)-one (4q)<sup>15</sup>**: According to general procedure, the crude residue was purified by flash chromatography (MeOH/CH<sub>2</sub>Cl<sub>2</sub> = 1/100) to give the product as a white solid (108 mg, 65%)

## 8. X-ray Crystallography Data for 3p

Single-crystal X-ray diffraction data for the reported complex was recorded at a temperature of 296.15 K on Bruker APEX-II CCD diffractometer. Basic information pertaining to crystal parameters and structure refinement is summarized in Table S3.

**Table S3.** Crystal data and structure refinement for **3p**

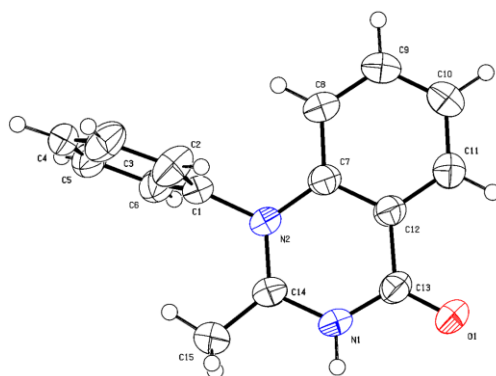

|                                    |                                                  |
|------------------------------------|--------------------------------------------------|
| Empirical formula                  | C <sub>15</sub> H <sub>13</sub> N <sub>2</sub> O |
| Formula weight                     | 237.27                                           |
| Temperature/K                      | 296.15                                           |
| Crystal system                     | monoclinic                                       |
| Space group                        | P2 <sub>1</sub> /c                               |
| a/Å                                | 10.114(3)                                        |
| b/Å                                | 17.036(5)                                        |
| c/Å                                | 7.5282(19)                                       |
| α/°                                | 90.00                                            |
| β/°                                | 108.445(4)                                       |
| γ/°                                | 90.00                                            |
| Volume/Å <sup>3</sup>              | 1230.5(6)                                        |
| Z                                  | 4                                                |
| ρ <sub>calc</sub> /cm <sup>3</sup> | 1.281                                            |
| μ/mm <sup>-1</sup>                 | 0.082                                            |
| F(000)                             | 500.0                                            |
| Radiation                          | MoKα (λ = 0.71073)                               |
| 2θ range for data collection/°     | 4.78 to 54.58                                    |
| Index ranges                       | -12 ≤ h ≤ 13, -21 ≤ k ≤ 21, -7 ≤ l ≤ 9           |
| Reflections collected              | 7117                                             |

|                                                |                                                                  |
|------------------------------------------------|------------------------------------------------------------------|
| Independent reflections                        | 2742 [ $R_{\text{int}} = 0.0283$ , $R_{\text{sigma}} = 0.0357$ ] |
| Data/restraints/parameters                     | 2742/6/164                                                       |
| Goodness-of-fit on $F^2$                       | 1.055                                                            |
| Final R indexes [ $I \geq 2\sigma(I)$ ]        | $R_1 = 0.0684$ , $wR_2 = 0.2004$                                 |
| Final R indexes [all data]                     | $R_1 = 0.0894$ , $wR_2 = 0.2214$                                 |
| Largest diff. peak/hole / $e \text{ \AA}^{-3}$ | 0.49/-0.43                                                       |

**Crystallization:** Crystals of compound **3p** suitable for X-ray analysis were grown from the solvent of ethyl acetate/petroleum ether by slow evaporation method.

## 8. References

1. L. Zhang, Q. Chen, L. Li, N. Ma, J. Tian, H. Sun, Q. Xu, Y. Yang and C. Li, Synthesis of N-Unsubstituted and N3-Substituted Quinazoline-2,4(1H,3H)-diones from o-Aminobenzamides and CO(2) at Atmospheric Pressure and Room Temperature, *Org. Lett.*, 2023, **25**, 2471-2475.
2. R. Zhao, S. Wen, H. Fu, M. Liu, Q. Liu and H. Zhou, Bis(2-methoxyethyl)ether promoted intramolecular acceptorless dehydrogenative coupling to construct structurally diverse quinazolinones by molecular oxygen, *Green Chem.*, 2022, **24**, 1644-1649.
3. Y.-S. Ran, B. Jiang, Y.-T. Shen, T.-G. Fan, W. Jiang, C. Zhang and Y.-M. Li, Visible-Light-Promoted Cascade Cyclization of 3-Ethynyl-[1,1'-biphenyl]-2-Carbonitriles with Unsaturated  $\alpha$ -Bromocarbonyls, *Org. Lett.*, 2023, **25**, 7412-7416.
4. S. Kumari, S. Roy, P. Arora and S. Kundu, Visible light-mediated synthesis of quinazolinones and benzothiadiazine-1,1-dioxides utilizing aliphatic alcohols, *Org. Biomol. Chem.*, 2024, **22**, 4172-4178.
5. G. Bonola, P. Da Re, M. J. Magistretti, E. Massarani and I. Setnikar, 1-Aminoacyl-2,3-dihydro-4(1H)-quinazolinone derivatives with choleretic and antifibrillatory activity, *J. Med. Chem.*, 1968, **11**, 1136-1139.
6. V. Sriramoju, S. Kurva and S. Madabhushi, Oxone-mediated annulation of 2-aminobenzamides and 1,2-diaminobenzenes with -amines imine-oxides: new syntheses of 2,3-dihydroquinazolin-4(1)-ones and 1-benzimidazoles, *New J. Chem.*, 2018, **42**, 3188-3191.
7. M. Sharma, R. Mahar, S. K. Shukla, R. Kant and P. M. S. Chauhan, Potassium carbonate mediated unusual transformation of 2,3-dihydroquinazolinone via cascade reaction, *Tetrahedron Lett.*, 2013, **54**, 6171-6177.
8. S. K. Ghosh and R. Nagarajan, Deep eutectic solvent mediated synthesis of quinazolinones and dihydroquinazolinones: synthesis of natural products and drugs, *RSC Adv.*, 2016, **6**, 27378-27387.
9. A. Y. Ershov, N. A. Lovushkina, I. V. Lagoda, S. I. Yakimovich, I. V. Zerova, V. V. Pakal'nis and V. V. Shamanin, Anthranoylhydrazones of aliphatic aldehydes and their cyclization to quinazolin-4-one derivatives, *Chem. Heterocycl. Compd.*, 2009, **45**, 965-969.
10. M. Yamato, J. Horiuchi and Y. Takeuchi, Reaction of 1, 2, 3, 4-Tetrahydroquinazolin-4-ones with Acid Anhydride. II, *Chem. Pharm. Bull. (Tokyo)*, 1981, **29**, 3055-3059.
11. C. Ely, d. Lourdes Borba Magalhães Maria, C. Henrique Lemos Soares and E. Skoronski, Optimization of Phenol Removal from Biorefinery Effluent Using Horseradish Peroxidase, *J. Environ. Eng.*, 2017, **143**, 04017075.
12. S. W. Li, M. G. Nair, D. M. Edwards, R. L. Kisliuk, Y. Gaumont, I. K. Dev, D. S. Duch, J. Humphreys, G. K. Smith and R. Ferone, Folate analogs. 35. Synthesis and biological evaluation of 1-deaza, 3-deaza, and bridge-elongated analogs of N10-propargyl-5,8-dideazafoolic acid, *J. Med. Chem.*, 1991, **34**, 2746-2754.
13. D. R. Yennamaneni, V. Amrutham, K. S. Gajula, M. Boosa, R. Madasu and N. Nama, Zeolite-catalyzed synthesis of quinazolin-4(3H)-ones through selective cleavage of C-C bond of 1,3-diketones under solvent-free conditions, *Sustainable Chem. Pharm.*, 2022, **27**, 100676.
14. B. Wang, Z. Wang, X. You, Z. Li and J. Yang, One-Step Construction of 2-Methylquinazolin-4(3H)-ones Using Solid Calcium Carbide as an Alternative to Gaseous Acetylene, *J. Org. Chem.*, 2025, **90**, 385-393.
15. J. Desroches, C. Kieffer, N. Primas, S. Hutter, A. Gellis, H. El-Kashef, P. Rathelot, P. Verhaeghe, N. Azas and P. Vanelle, Discovery of new hit-molecules targeting Plasmodium falciparum through a global SAR study of the 4-substituted-2-trichloromethylquinazoline antiparasmodial scaffold, *Eur. J. Med. Chem.*, 2017, **125**, 68-86.
16. J. Kim, S. Y. Lee, J. Lee, Y. Do and S. Chang, Synthetic Utility of Ammonium Salts in a Cu-Catalyzed Three-Component Reaction as a Facile Coupling Partner, *J. Org. Chem.*, 2008, **73**, 9454-9457.
17. M. S. Thakur, O. S. Nayal, V. Bhatt, S. Sharma and N. Kumar, Rapid and Efficient Cascade Synthesis of 2-Amino-4(3H)-quinazolinones over an In Situ-Generated Heterogeneous CuCO<sub>3</sub>-K<sub>2</sub>CO<sub>3</sub> Nanocomposite, *Asian J. Org. Chem.*, 2016, **5**, 750-754.
18. MEYERS, M., J.; SINGH, Megh; STALLINGS, Christina, L.; WEISS, Leslie, A.; WEISS, Leslie, A.; WILDMAN, Scott; ARNETT, Stacy, D. Aminopyrimidine Inhibitors of Histamine Receptors for the Treatment of Disease. US2010120741-A1, 2019.

## 9. Spectral Data and Characterization

### $^1\text{H}$ NMR (500 MHz, $\text{DMSO}-d_6$ ) of 2-amino-N-(4-methoxyphenyl)benzamide (1j)

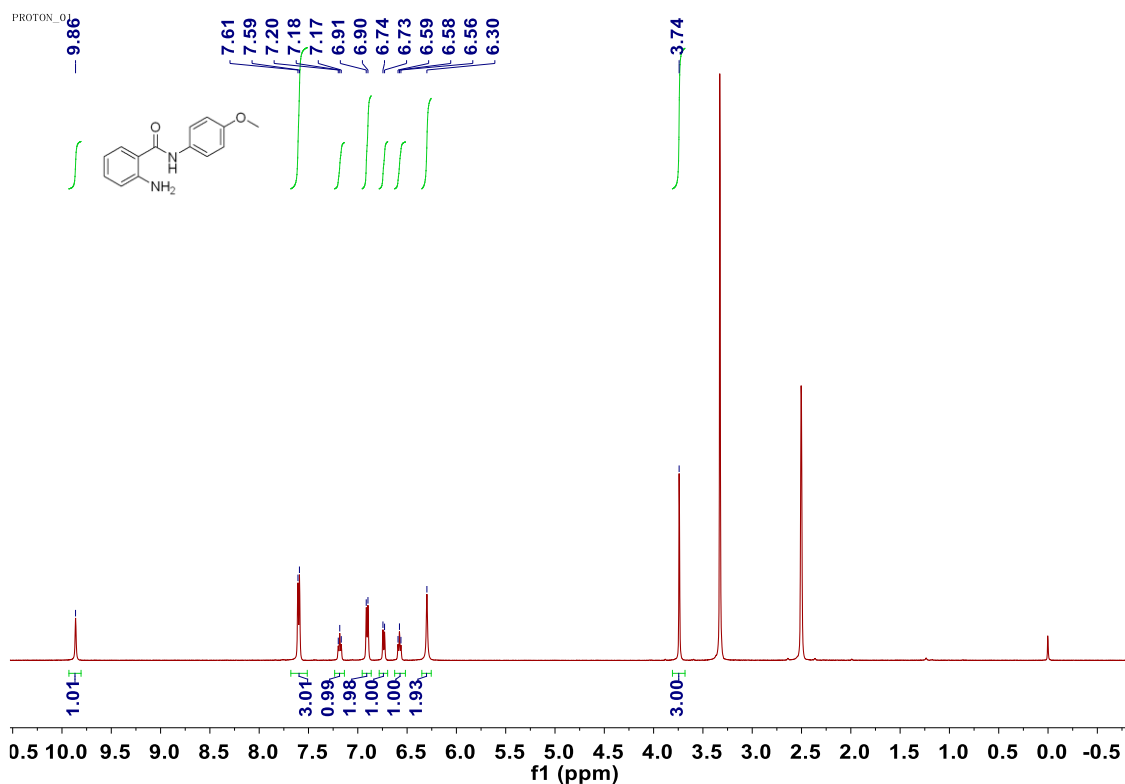

### $^{13}\text{C}\{^1\text{H}\}$ NMR (126 MHz, $\text{DMSO}-d_6$ ) of 2-amino-N-(4-methoxyphenyl)benzamide (1j)

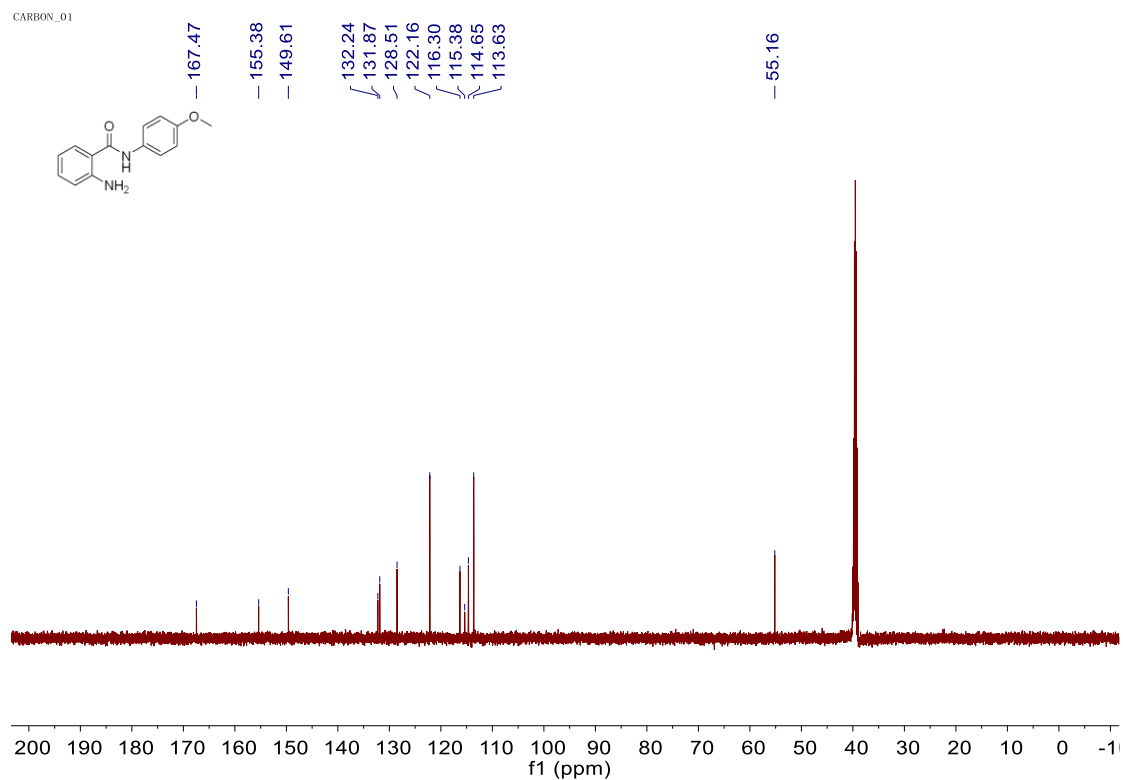



**<sup>1</sup>H NMR (500 MHz, DMSO-*d*<sub>6</sub>) of 2-amino-N-(4-fluorophenyl)benzamide (1k)**

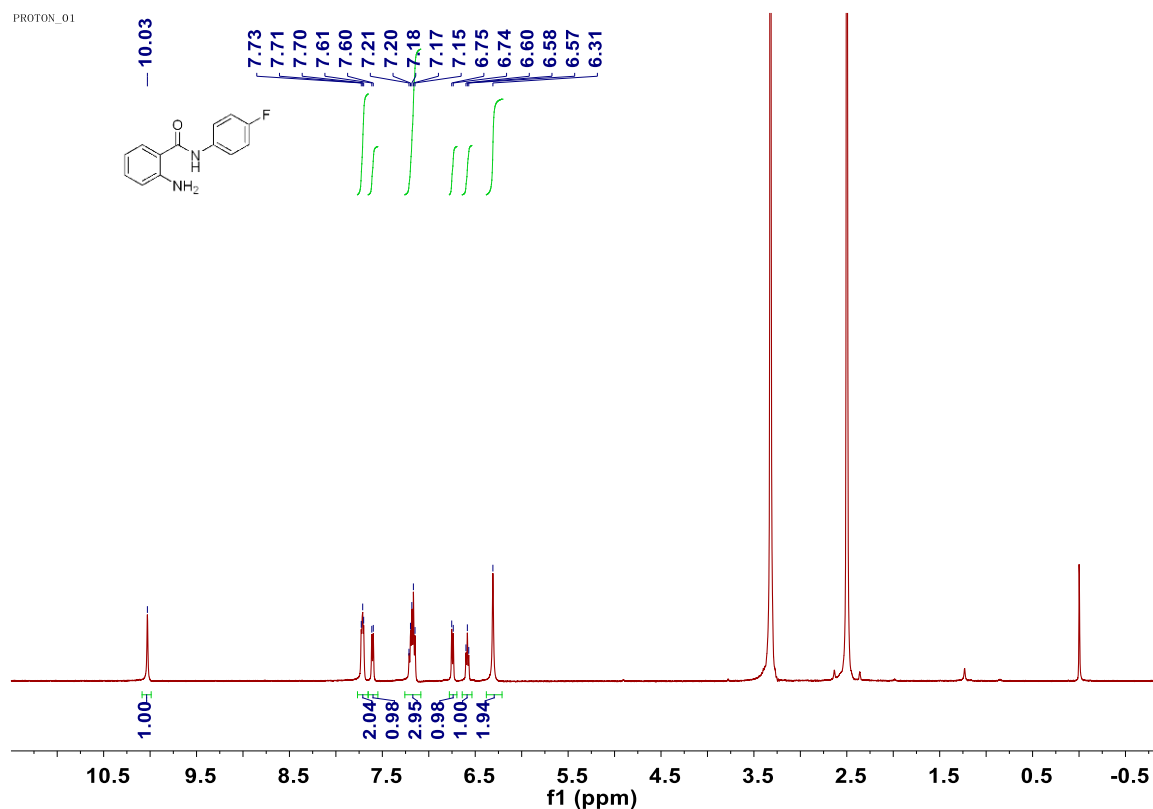

**<sup>13</sup>C{<sup>1</sup>H} NMR (126 MHz, DMSO-*d*<sub>6</sub>) of 2-amino-N-(4-fluorophenyl)benzamide (1k)**

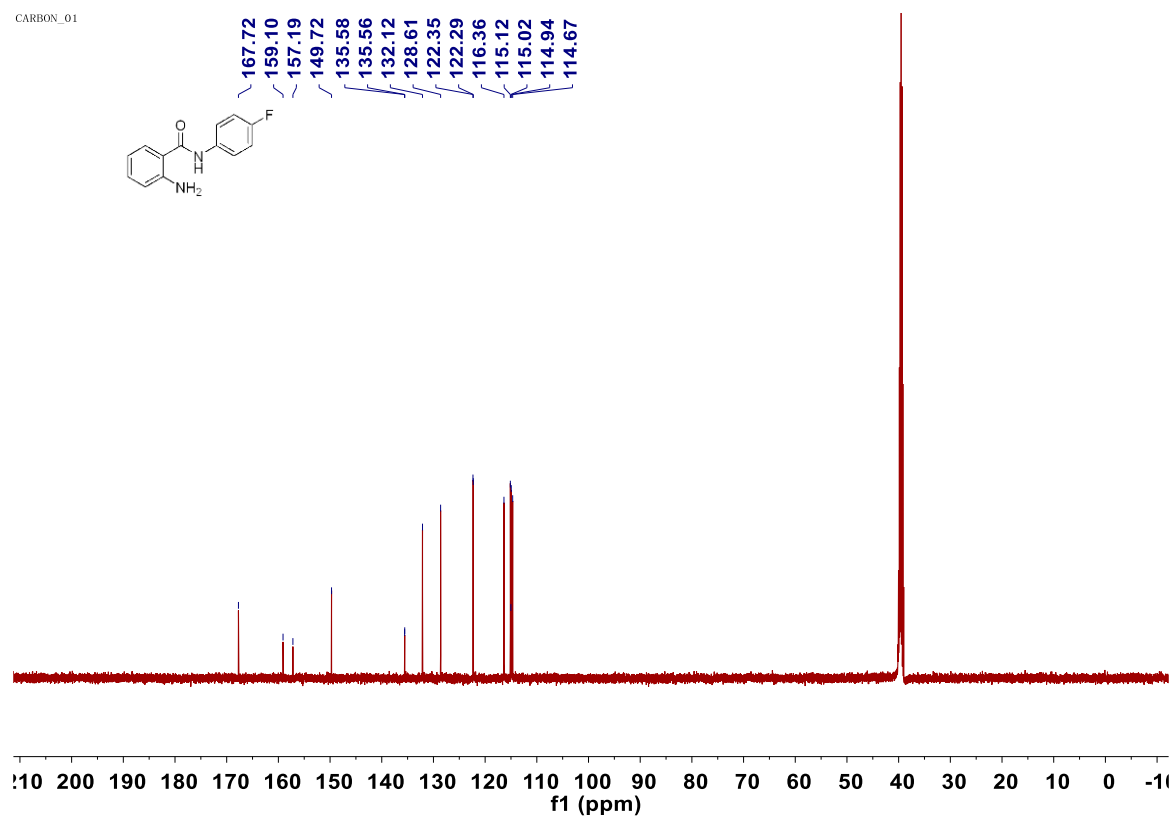

**$^1\text{H}$  NMR (500 MHz,  $\text{DMSO}-d_6$ ) of 2-amino-N-(4-chlorophenyl)benzamide (1l)**

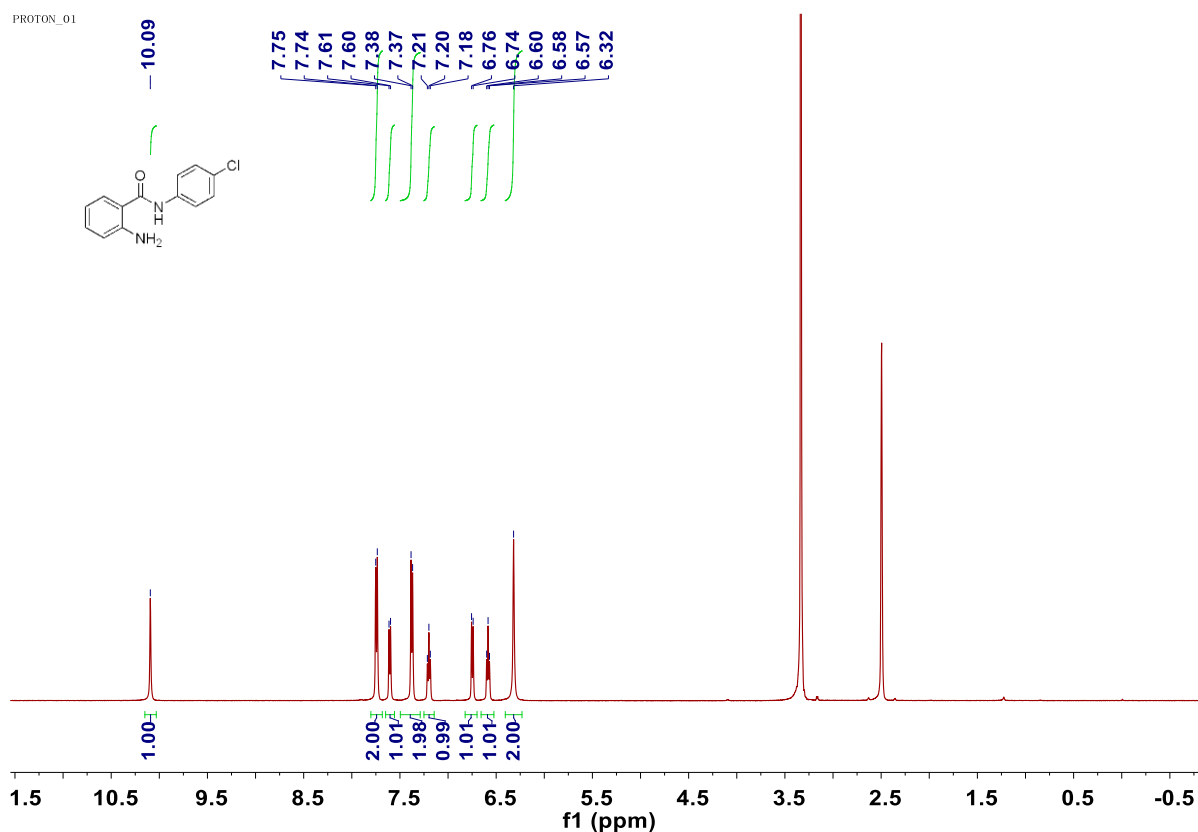

**$^{13}\text{C}\{^1\text{H}\}$  NMR (126 MHz,  $\text{DMSO}-d_6$ ) of 2-amino-N-(4-chlorophenyl)benzamide (1l)**

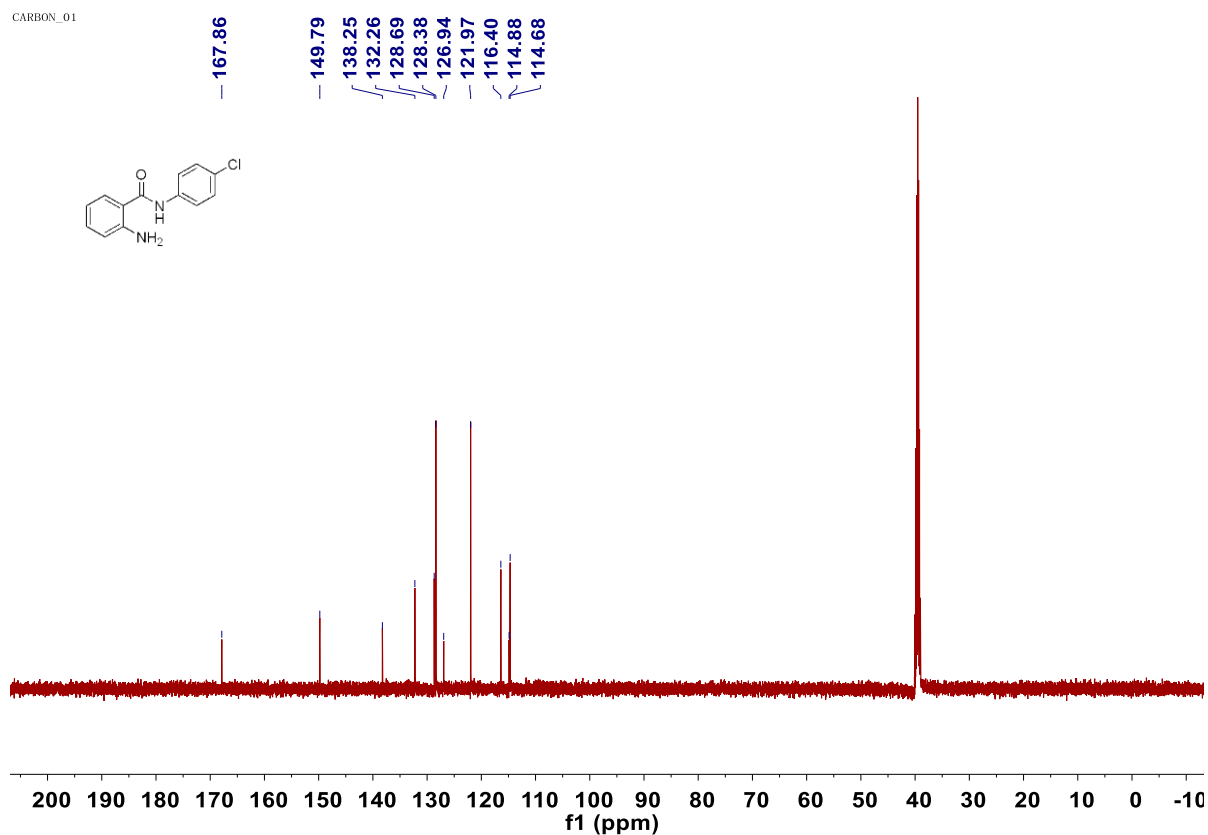

**$^1\text{H}$  NMR (500 MHz, DMSO- $d_6$ ) of 2-(benzylamino)-N-methylbenzamide (1ha)**

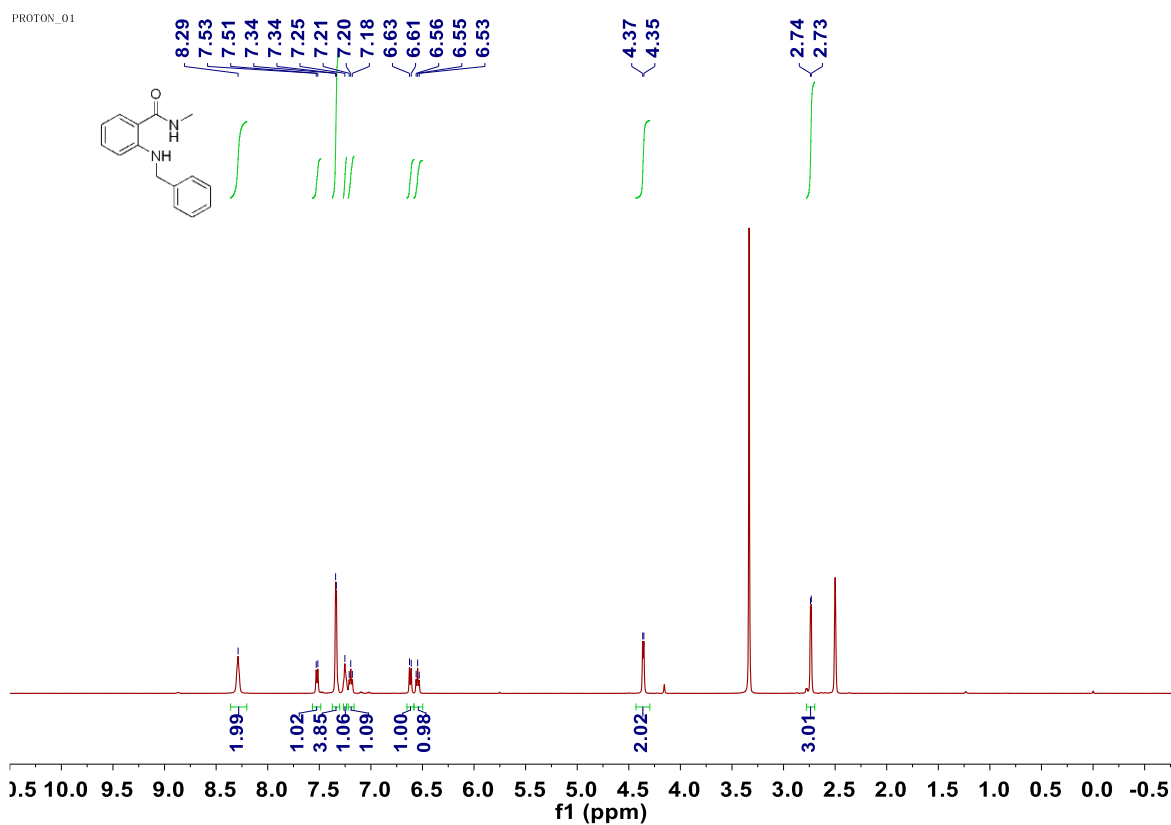

**$^{13}\text{C}\{^1\text{H}\}$  NMR (126 MHz, DMSO- $d_6$ ) of 2-(benzylamino)-N-methylbenzamide (1ha)**

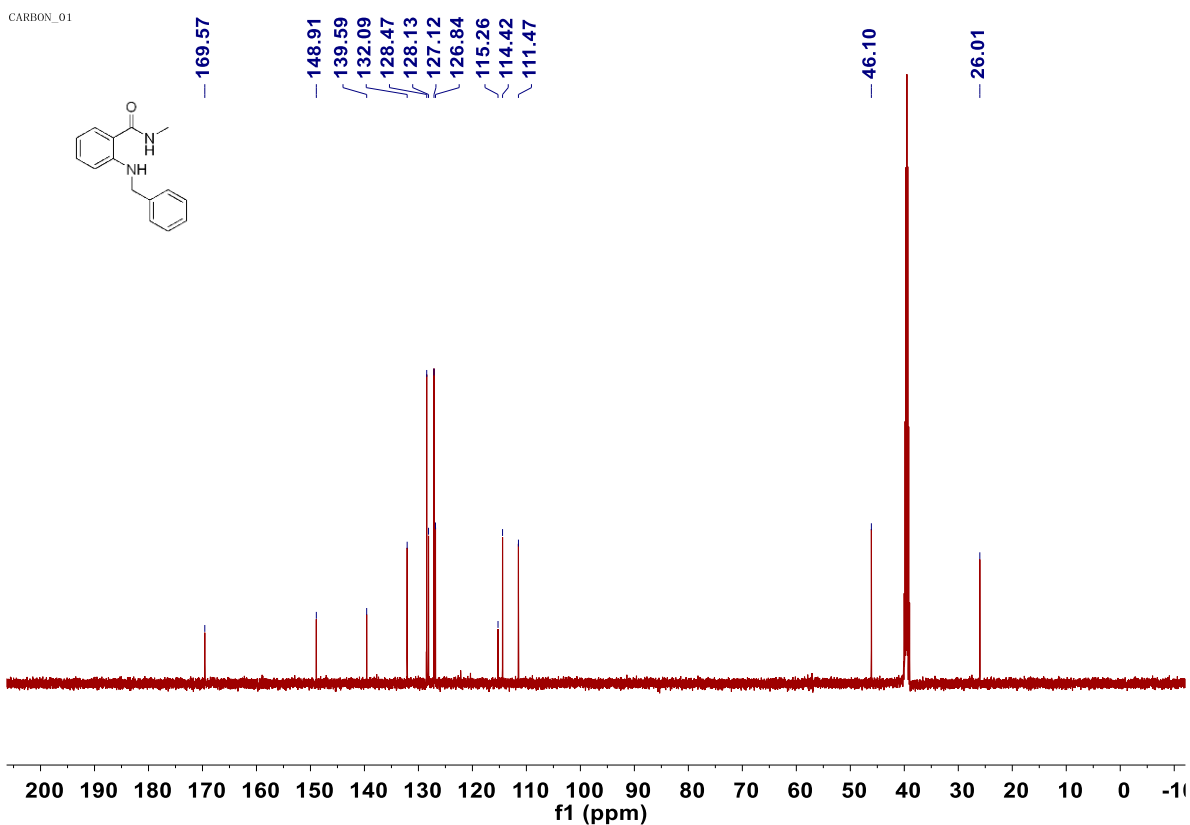

**$^1\text{H}$  NMR (500 MHz,  $\text{DMSO}-d_6$ ) of 3-amino-[1,1'-biphenyl]-2-carbonitrile (2am)**

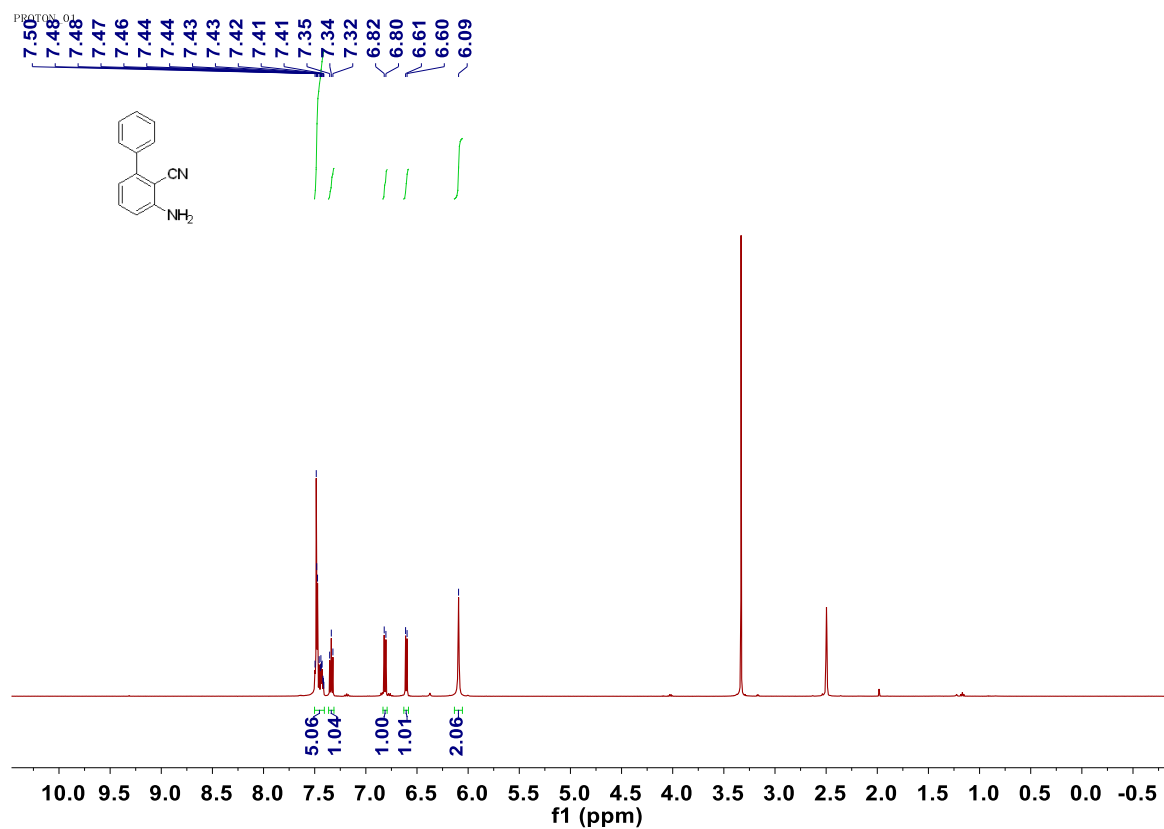

**$^{13}\text{C}\{^1\text{H}\}$  NMR (126 MHz,  $\text{DMSO}-d_6$ ) of 3-amino-[1,1'-biphenyl]-2-carbonitrile (2am)**

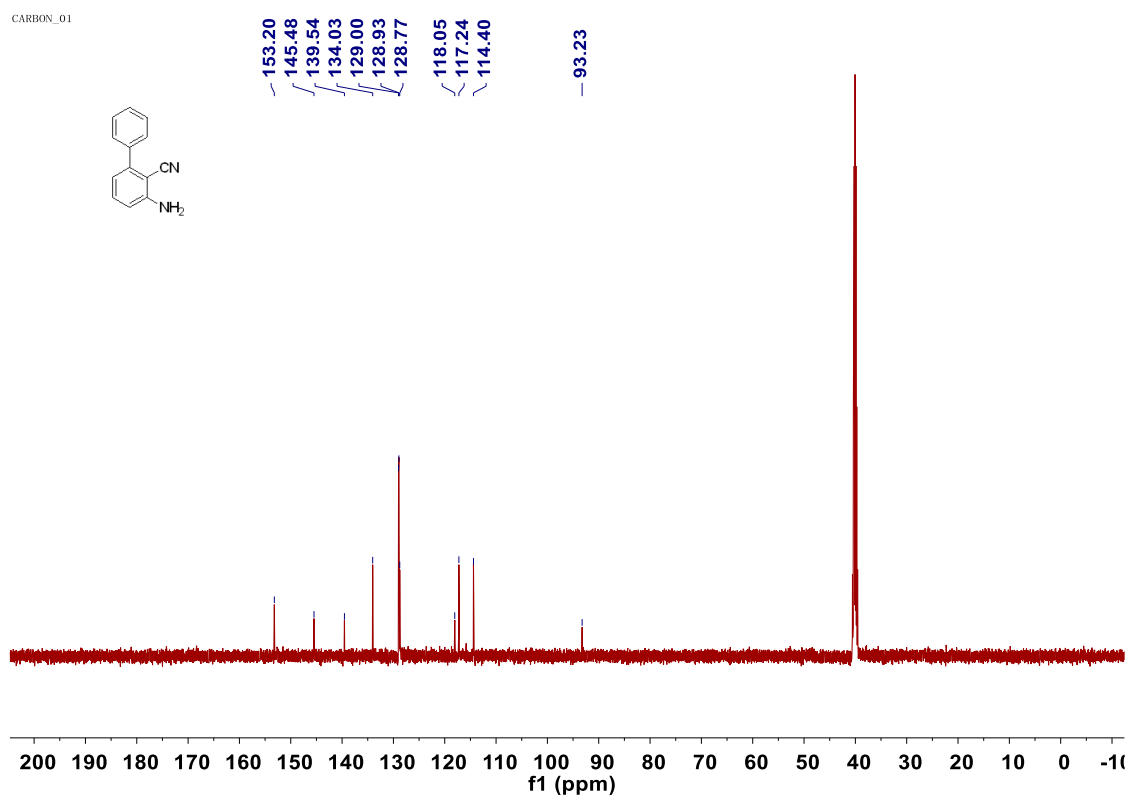

**$^1\text{H}$  NMR (500 MHz,  $\text{DMSO}-d_6$ ) of 2-methyl-2,3-dihydroquinazolin-4(1H)-one (3a)**

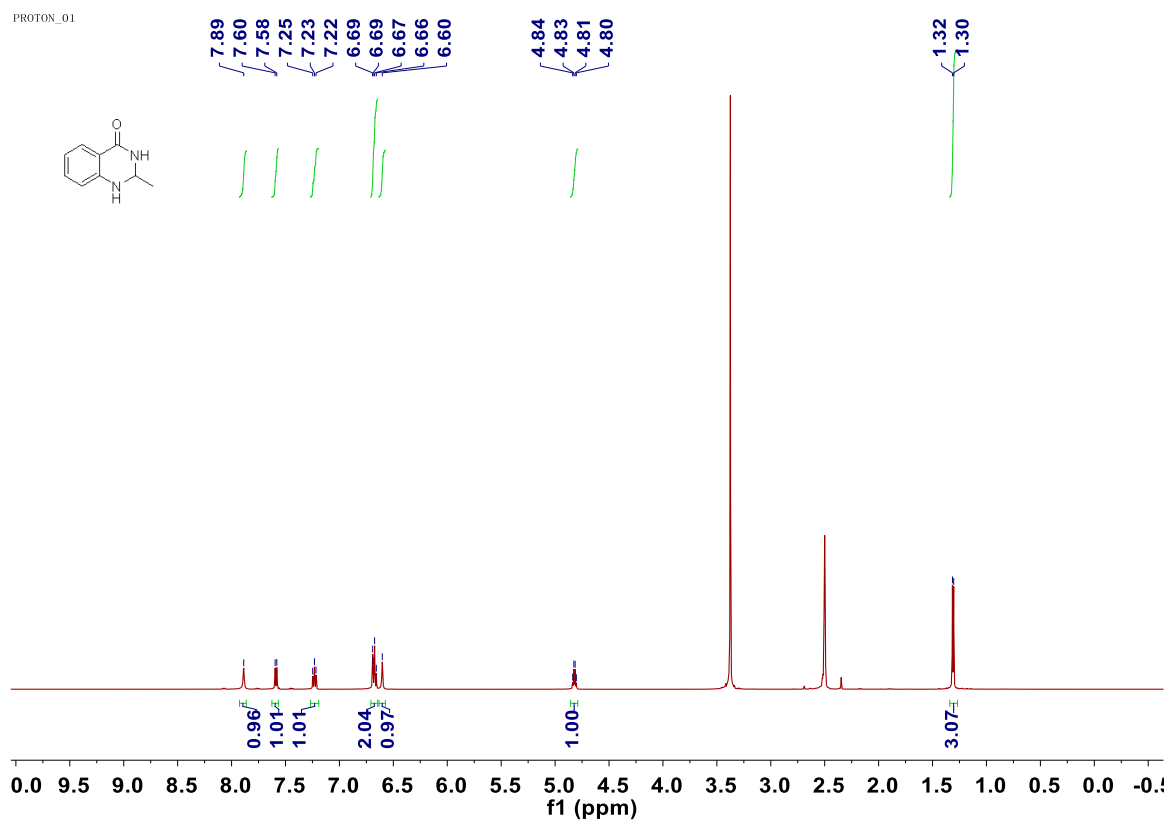

**$^{13}\text{C}\{^1\text{H}\}$  NMR (126 MHz,  $\text{DMSO}-d_6$ ) of 2-methyl-2,3-dihydroquinazolin-4(1H)-one (3a)**

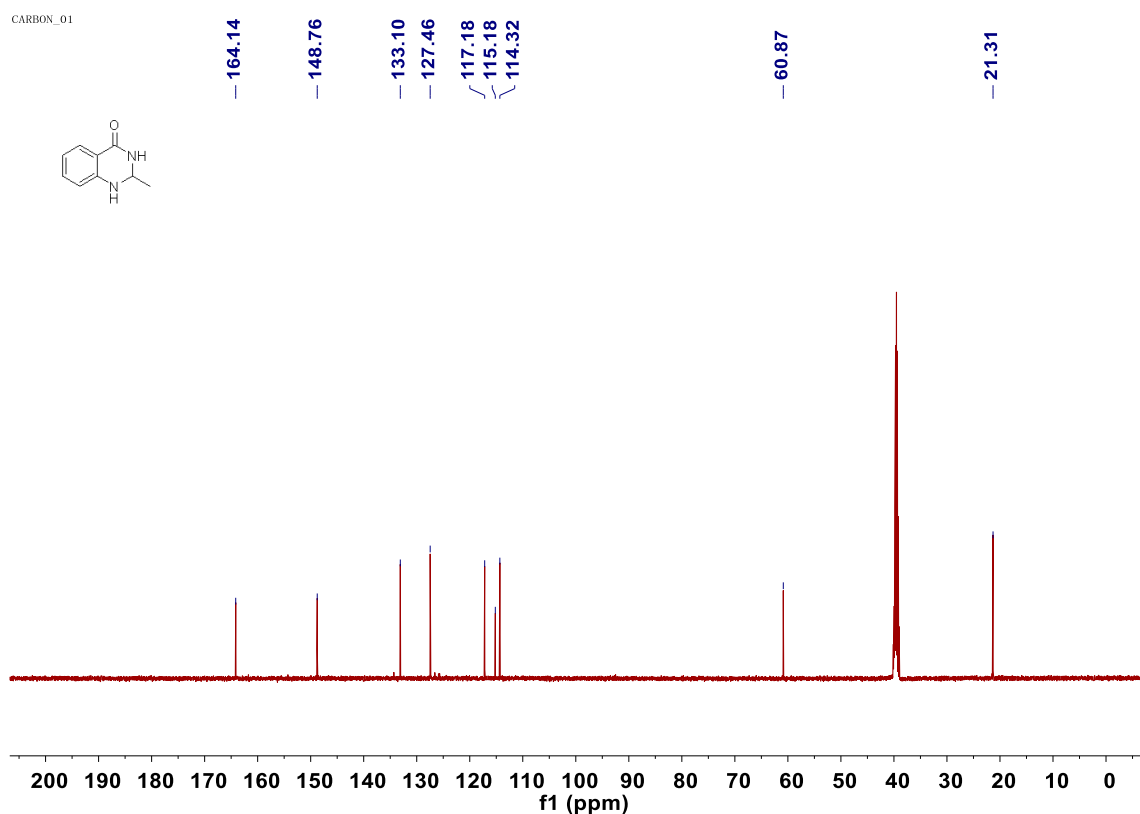

**$^1\text{H}$  NMR (500 MHz,  $\text{DMSO}-d_6$ ) of 2,7-dimethyl-2,3-dihydroquinazolin-4(1H)-one (3b)**

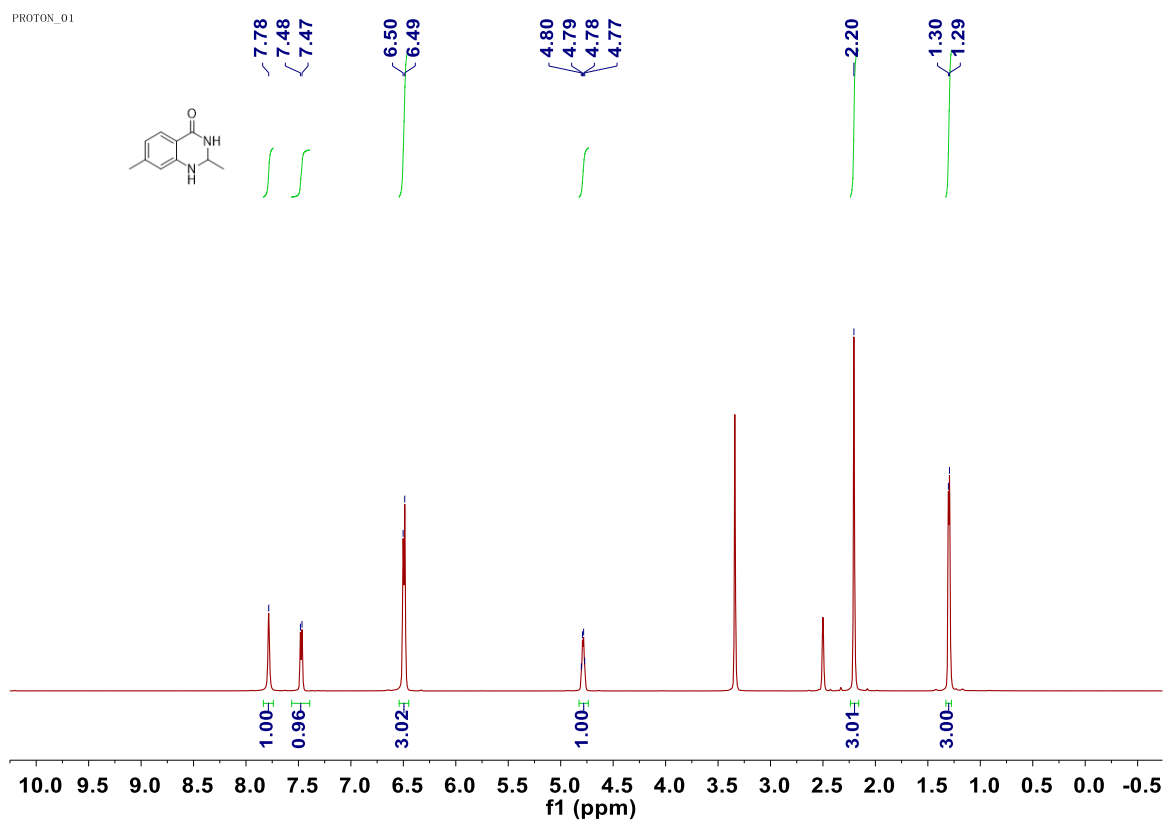

**$^{13}\text{C}\{^1\text{H}\}$  NMR (126 MHz,  $\text{DMSO}-d_6$ ) of 2,7-dimethyl-2,3-dihydroquinazolin-4(1H)-one (3b)**

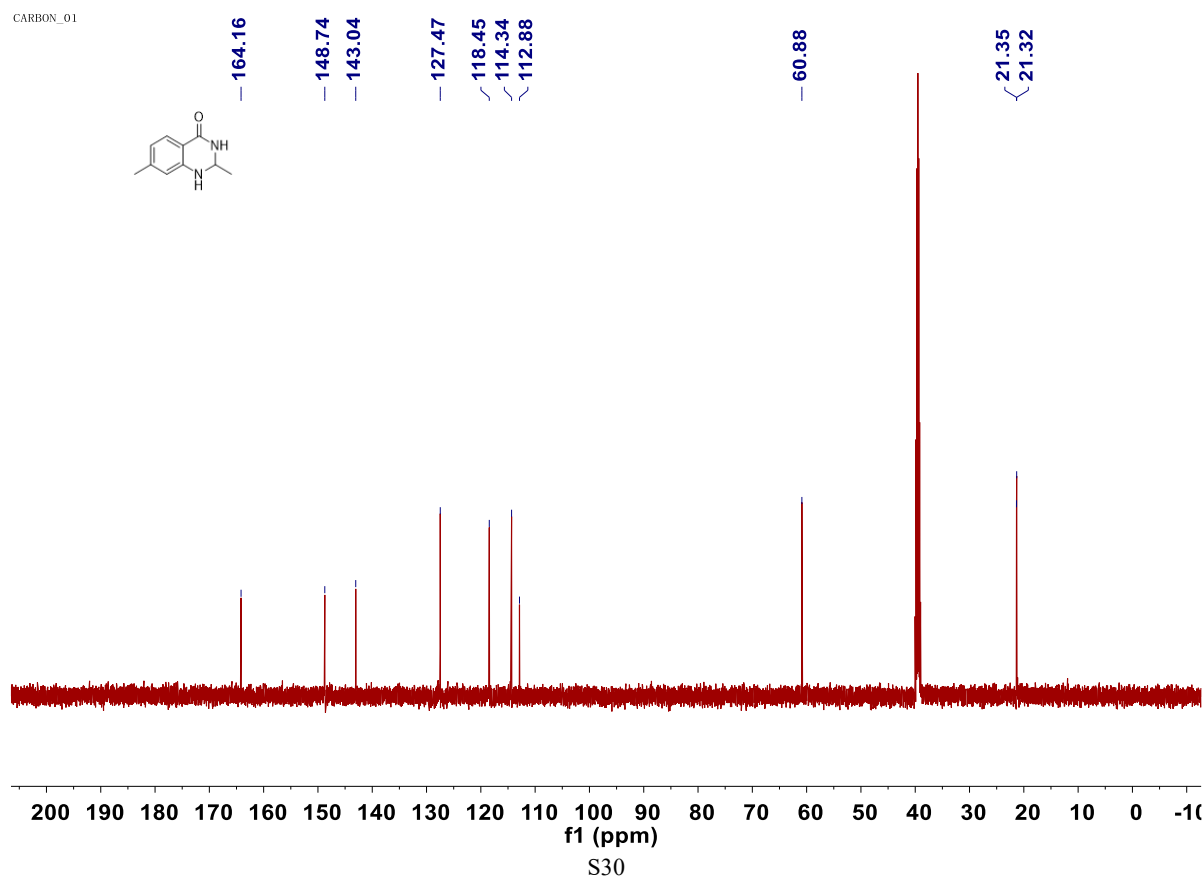

**$^1\text{H}$  NMR (500 MHz,  $\text{DMSO-}d_6$ ) of 7-chloro-2-methyl-2,3-dihydroquinazolin-4(1H)-one (3c)**

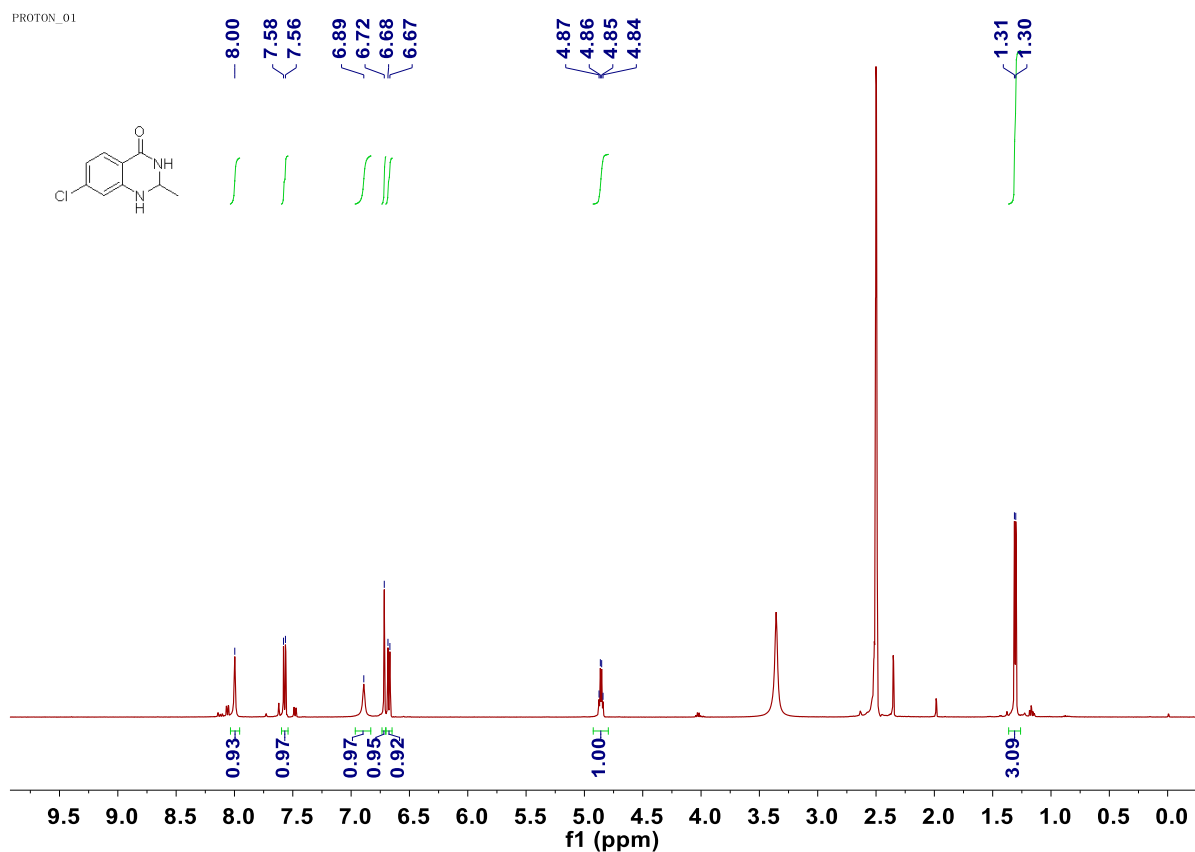

**$^{13}\text{C}\{^1\text{H}\}$  NMR (126 MHz,  $\text{DMSO-}d_6$ ) of 7-chloro-2-methyl-2,3-dihydroquinazolin-4(1H)-one (3c)**

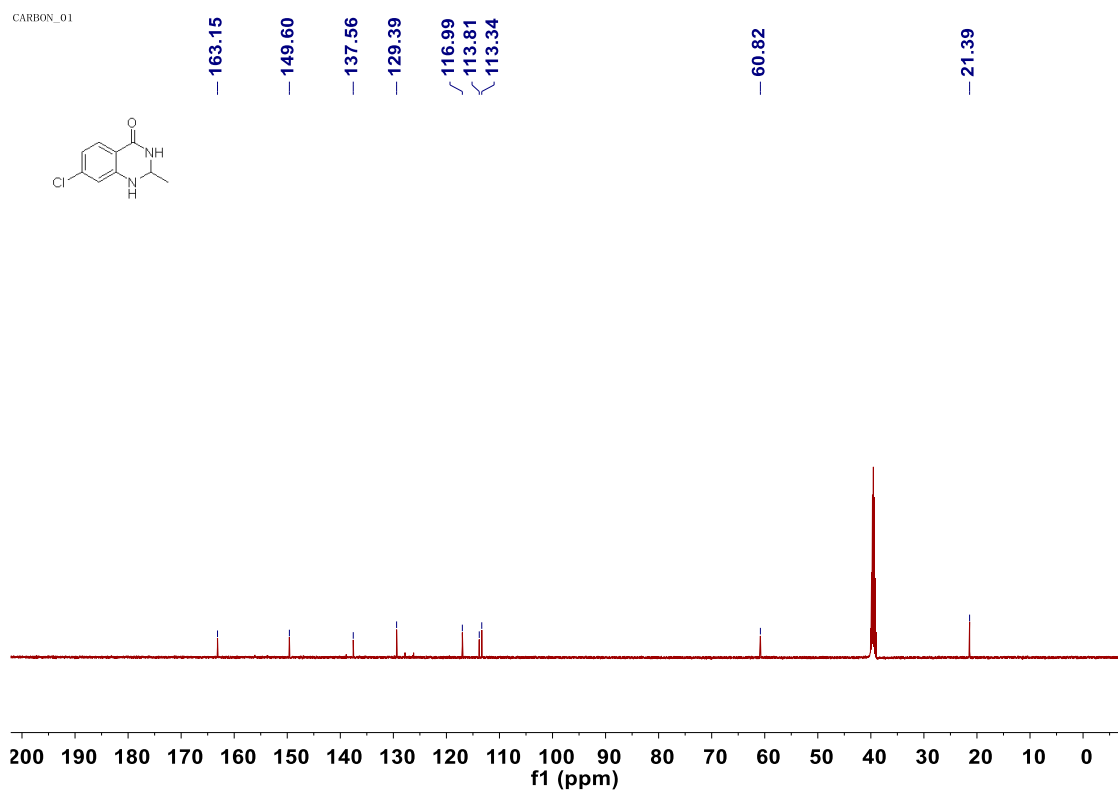

**<sup>1</sup>H NMR (500 MHz, DMSO-*d*<sub>6</sub>) of 6-fluoro-2-methyl-2,3-dihydroquinazolin-4(1H)-one (3d)**

LSY-3d

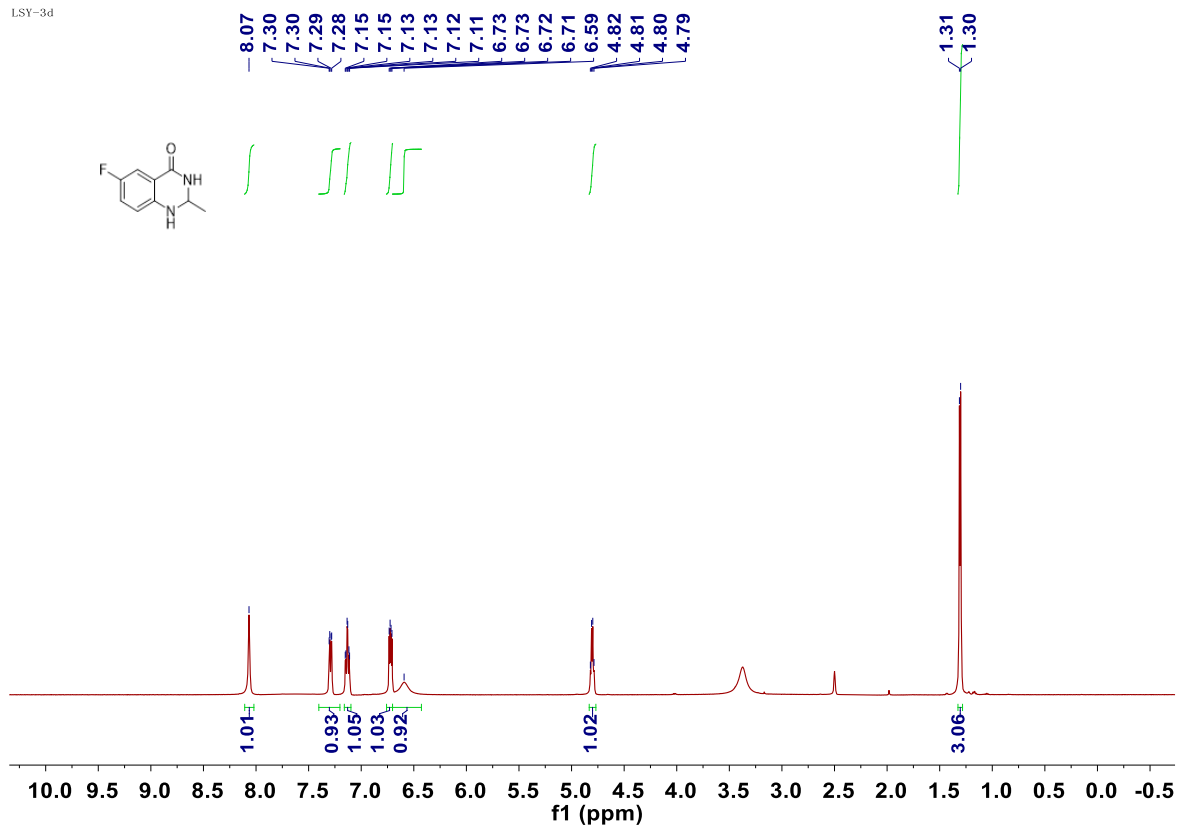

**<sup>13</sup>C{<sup>1</sup>H} NMR (126 MHz, DMSO-*d*<sub>6</sub>) of 6-fluoro-2-methyl-2,3-dihydroquinazolin-4(1H)-one (3d)**

CARBON\_01

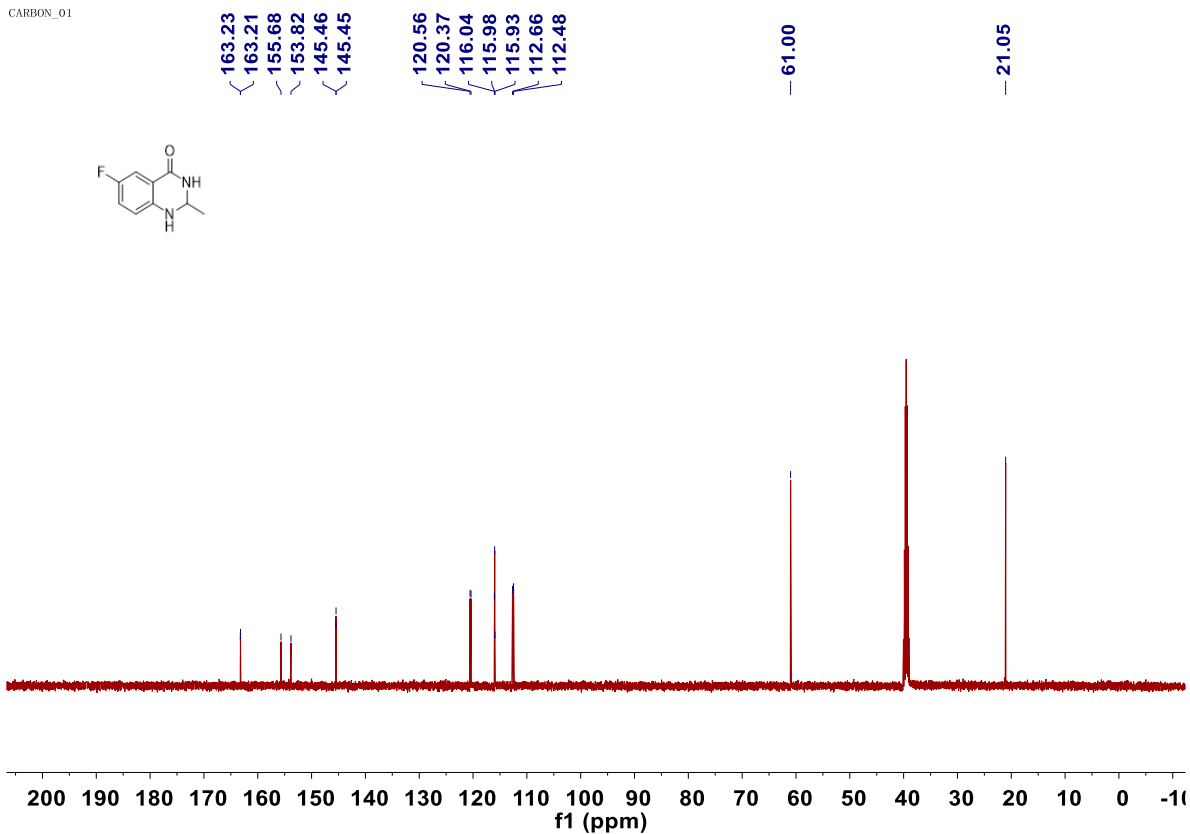



**$^{19}\text{F}$  NMR (470 MHz, DMSO- $d_6$ ) of 6-fluoro-2-methyl-2,3-dihydroquinazolin-4(1H)-one (3d)**

lsy-3d-F  
STANDARD FLUORINE PARAMETERS

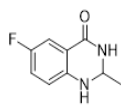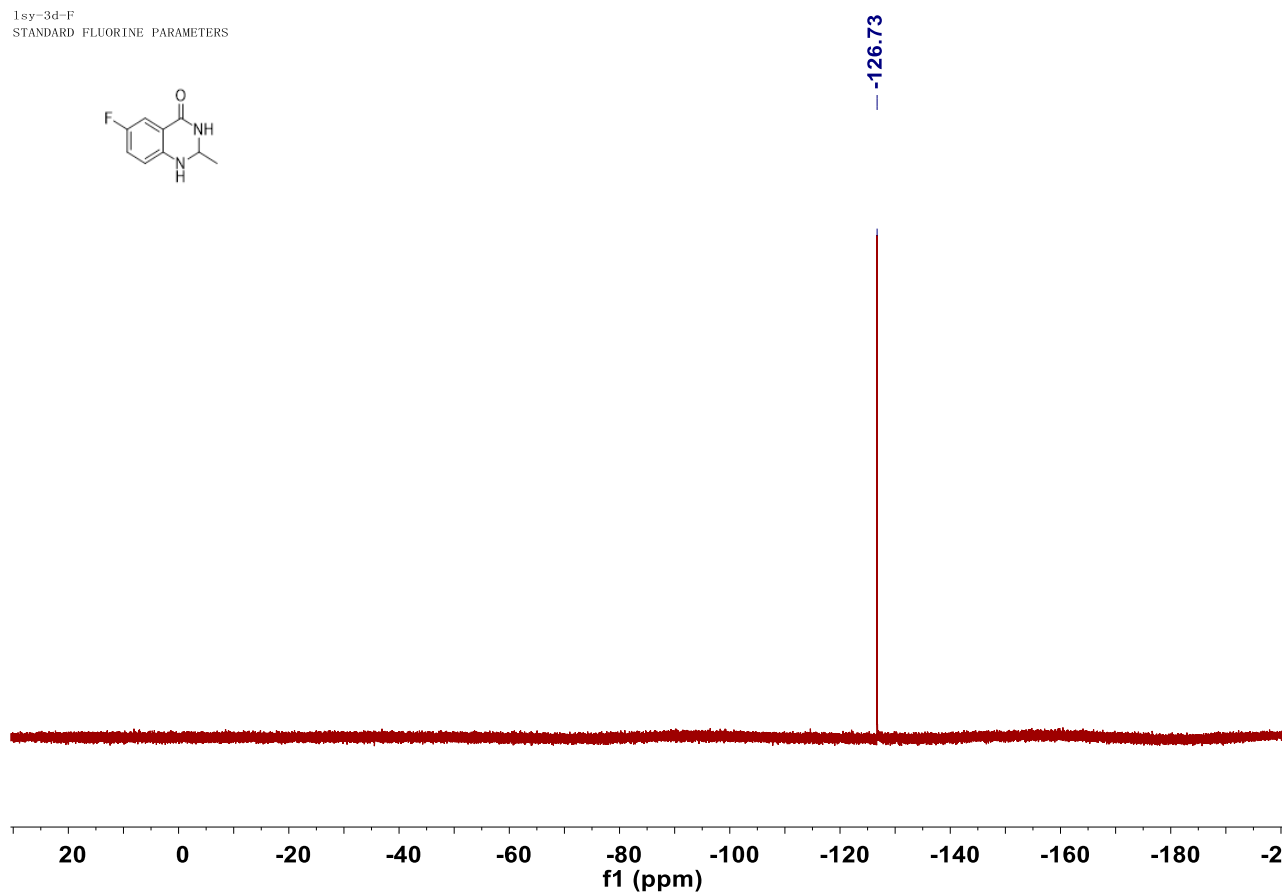

**<sup>1</sup>H NMR (500 MHz, DMSO-*d*<sub>6</sub>) of 6-chloro-2-methyl-2,3-dihydroquinazolin-4(1H)-one (3e)**

PROTON\_01

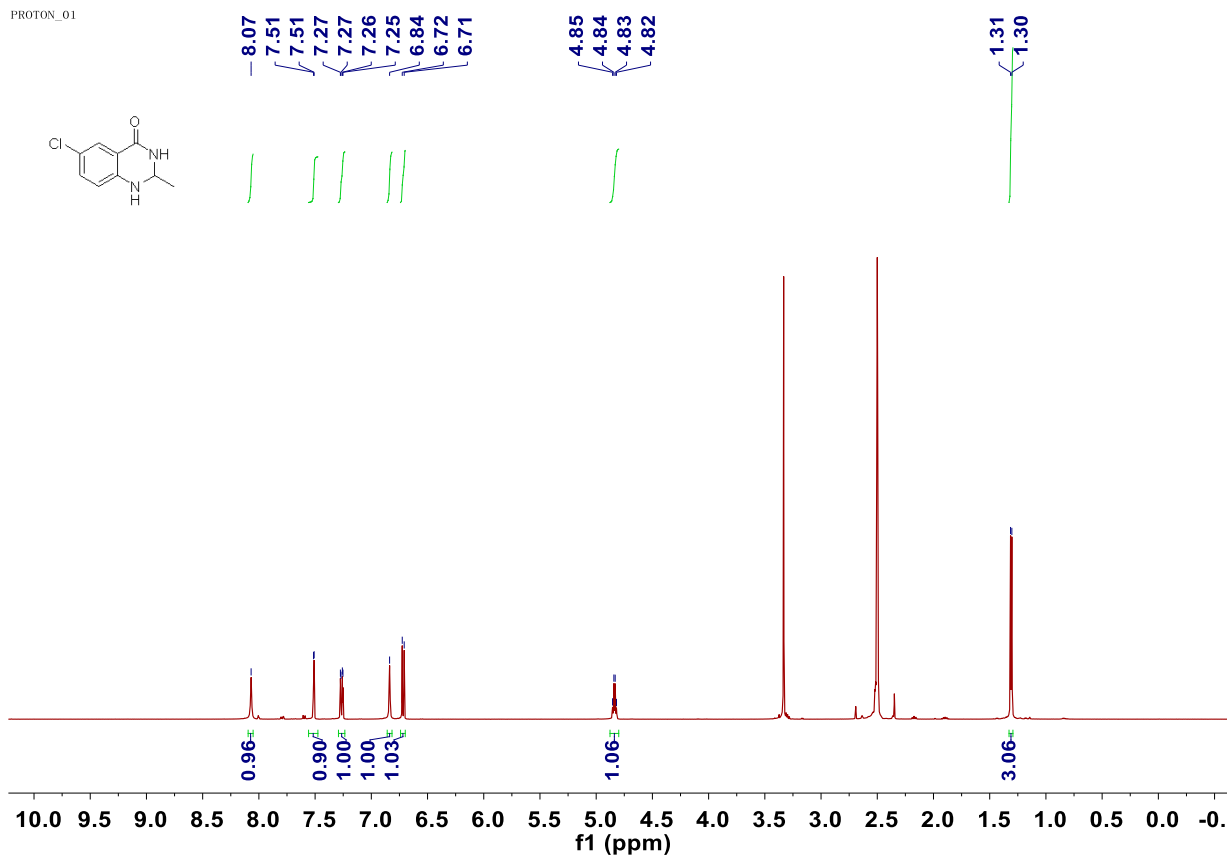

**<sup>13</sup>C{<sup>1</sup>H} NMR (126 MHz, DMSO-*d*<sub>6</sub>) of 6-chloro-2-methyl-2,3-dihydroquinazolin-4(1H)-one (3e)**

CARBON\_01

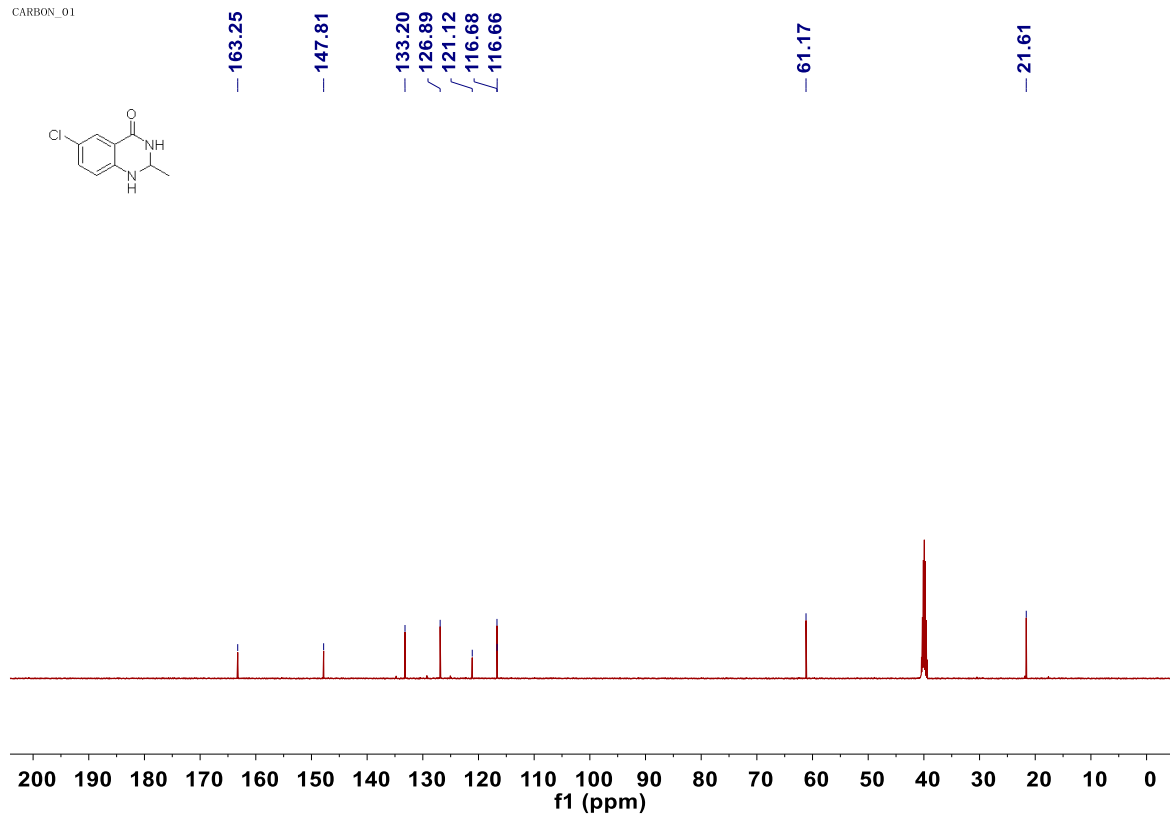

**<sup>1</sup>H NMR (500 MHz, DMSO-*d*<sub>6</sub>) of 6-bromo-2-methyl-2,3-dihydroquinazolin-4(1H)-one (3f)**

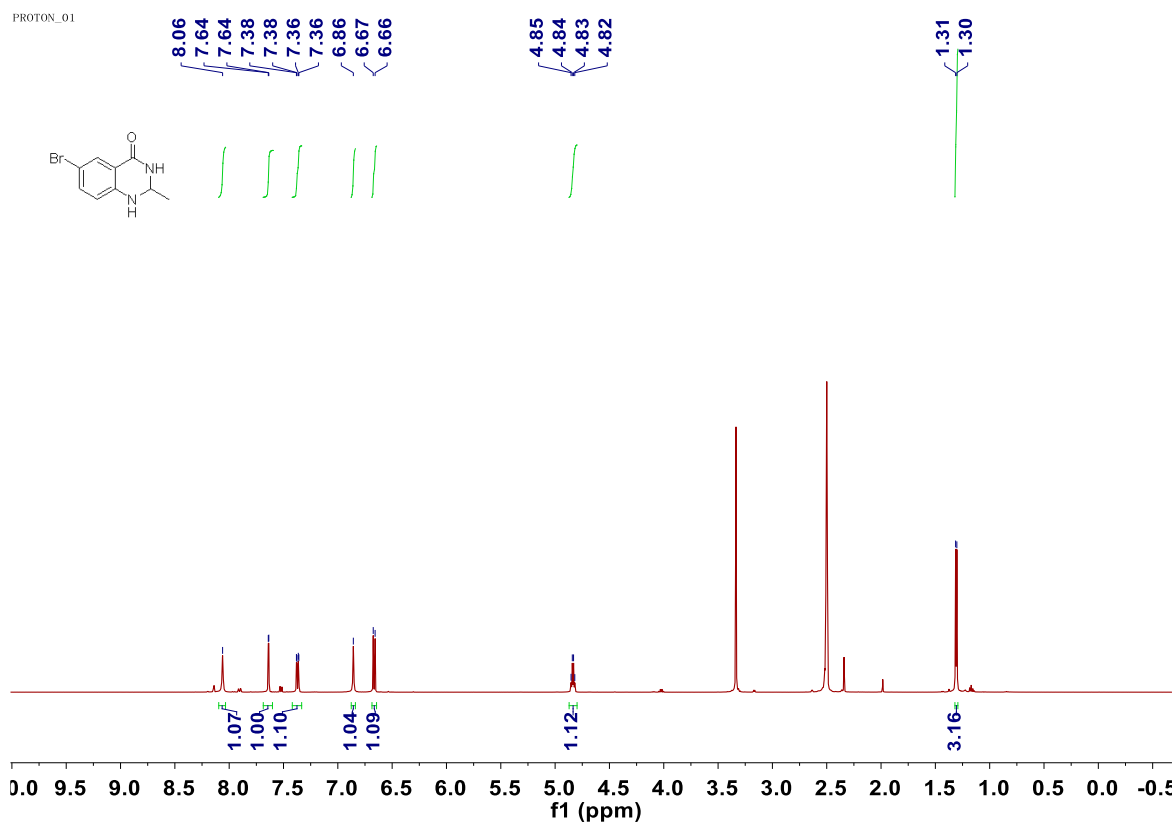

**<sup>13</sup>C{<sup>1</sup>H} NMR (126 MHz, DMSO-*d*<sub>6</sub>) of 6-bromo-2-methyl-2,3-dihydroquinazolin-4(1H)-one (3f)**

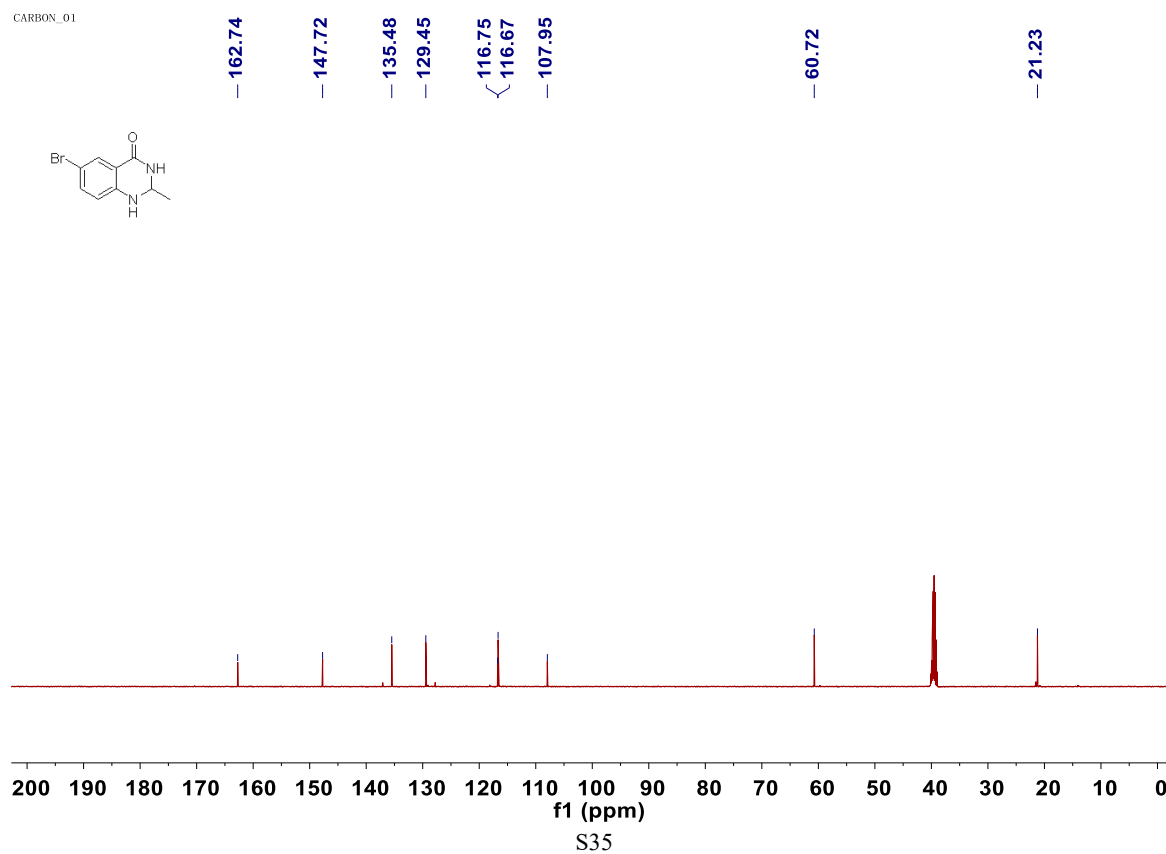

**$^1\text{H}$  NMR (500 MHz,  $\text{DMSO}-d_6$ ) of 5-fluoro-2-methyl-2,3-dihydroquinazolin-4(1H)-one (3g)**

PROTON\_01

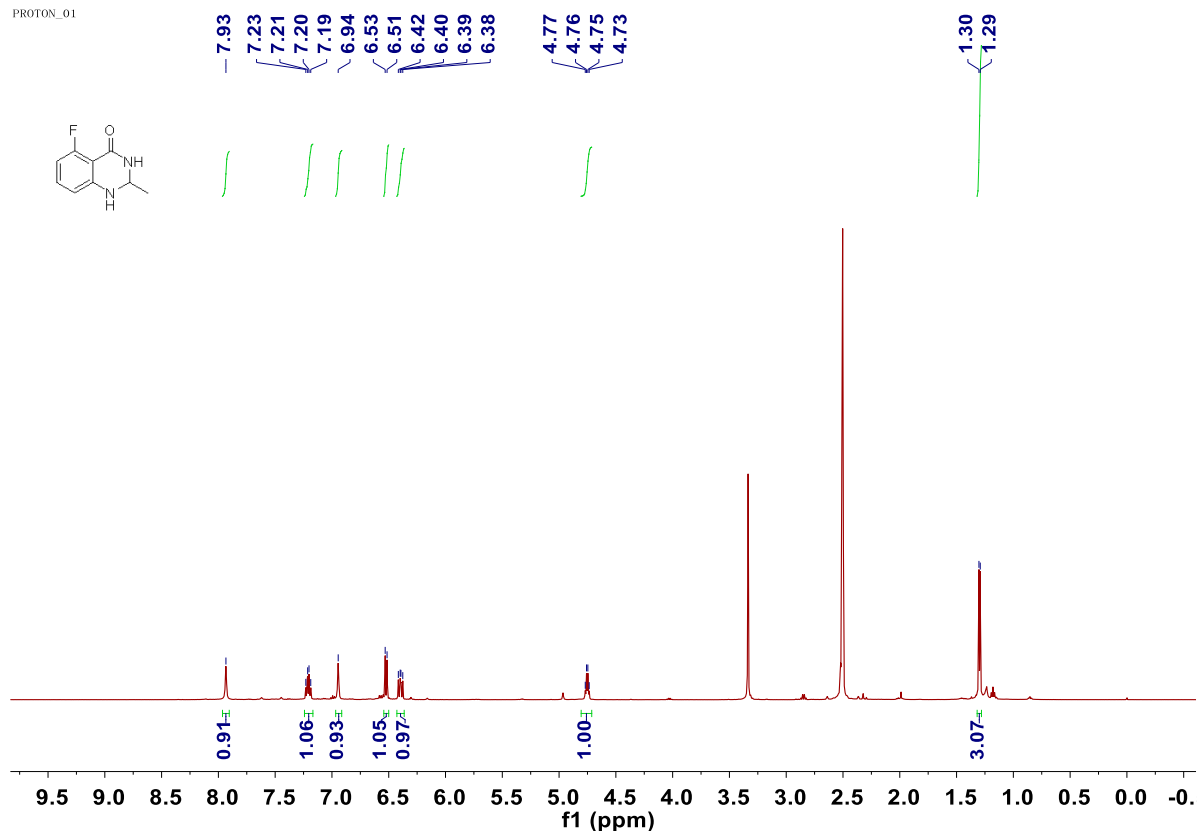

**$^{13}\text{C}\{^1\text{H}\}$  NMR (126 MHz,  $\text{DMSO}-d_6$ ) of 5-fluoro-2-methyl-2,3-dihydroquinazolin-4(1H)-one (3g)**

CARBON\_01

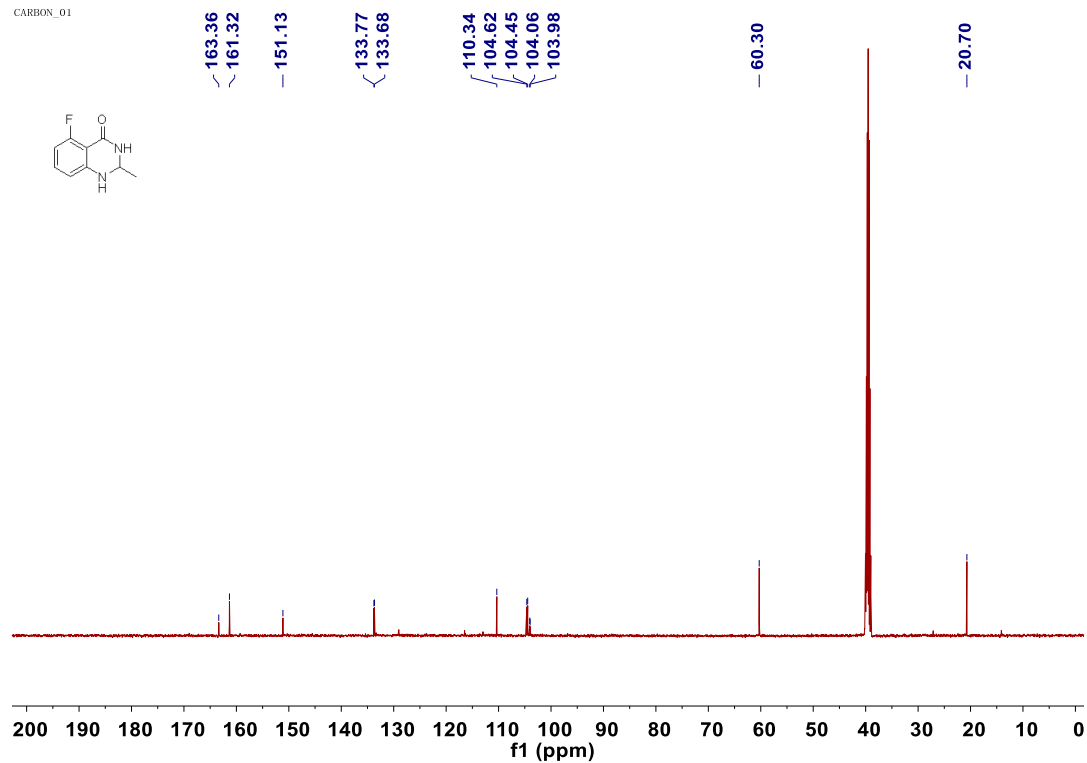

**$^{19}\text{F}$  NMR (470 MHz, DMSO- $d_6$ ) of 5-fluoro-2-methyl-2,3-dihydroquinazolin-4(1H)-one (3g)**

1sy-3g-F  
STANDARD FLUORINE PARAMETERS

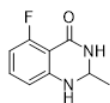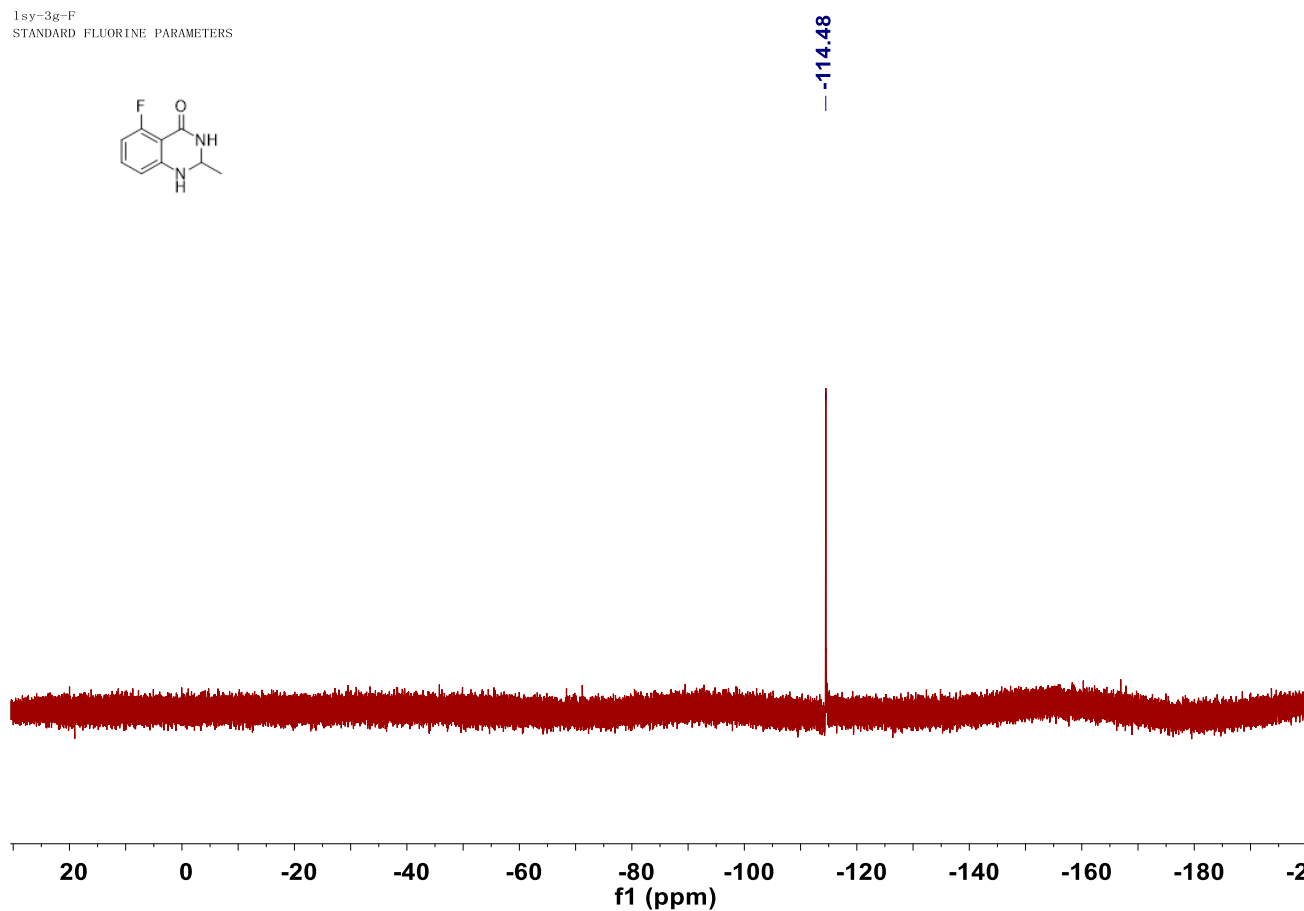

**$^1\text{H}$  NMR (500 MHz,  $\text{DMSO}-d_6$ ) of 2,3-dimethyl-2,3-dihydroquinazolin-4(1H)-one (3h)**

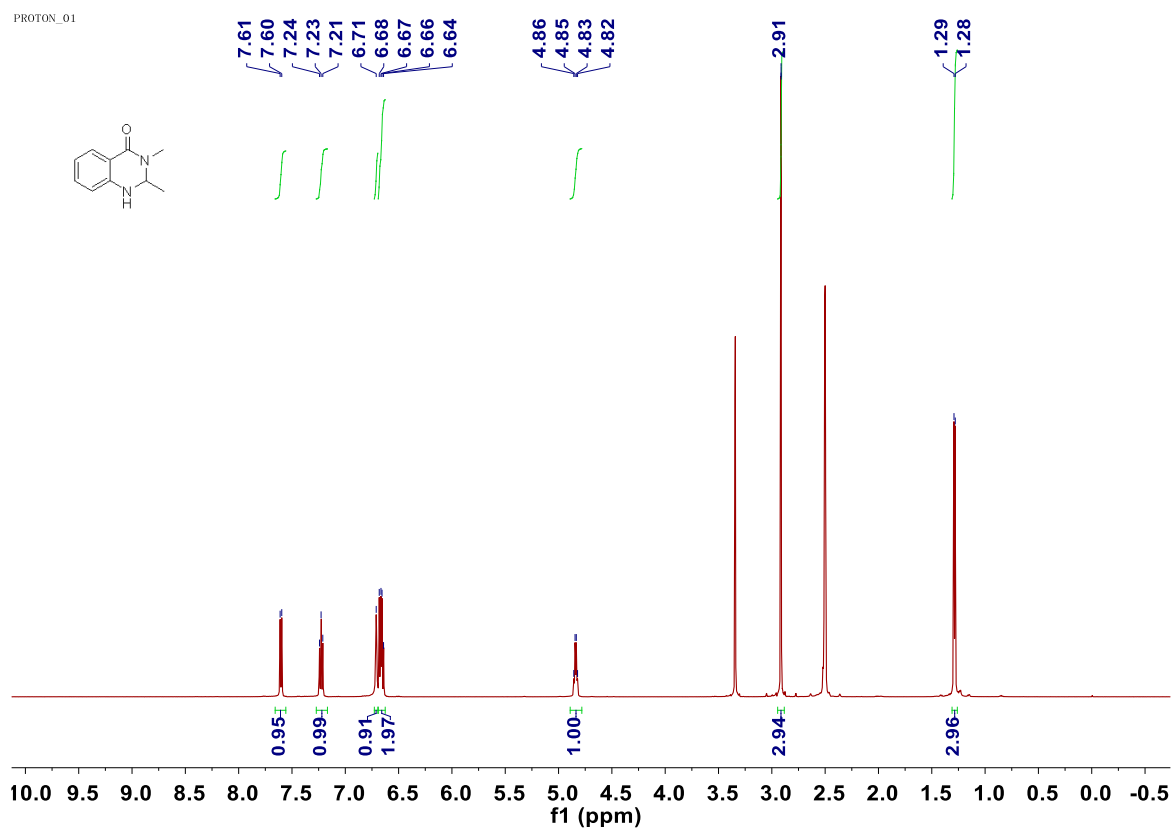

**$^{13}\text{C}\{^1\text{H}\}$  NMR (126 MHz,  $\text{DMSO}-d_6$ ) of 2,3-dimethyl-2,3-dihydroquinazolin-4(1H)-one (3h)**

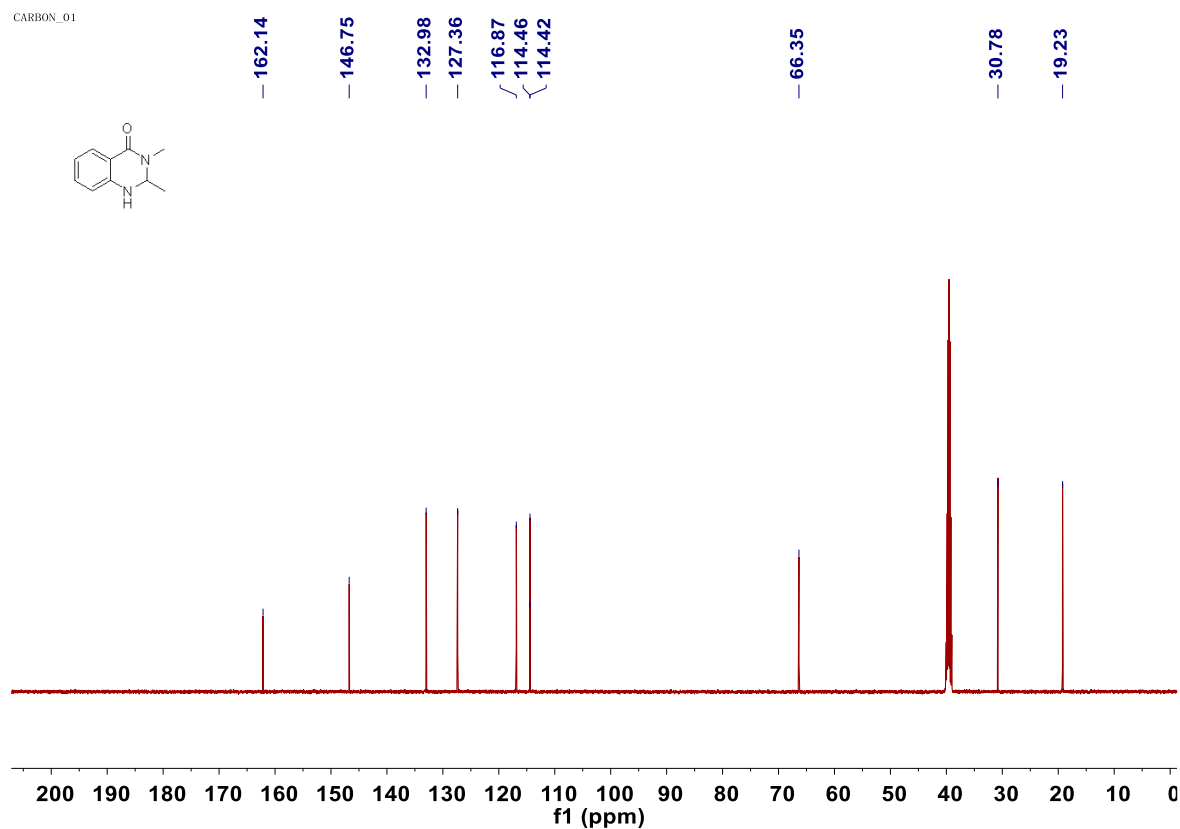

**$^1\text{H}$  NMR (500 MHz, DMSO- $d_6$ ) of 2-methyl-3-propyl-2,3-dihydroquinazolin-4(1H)-one (3i)**

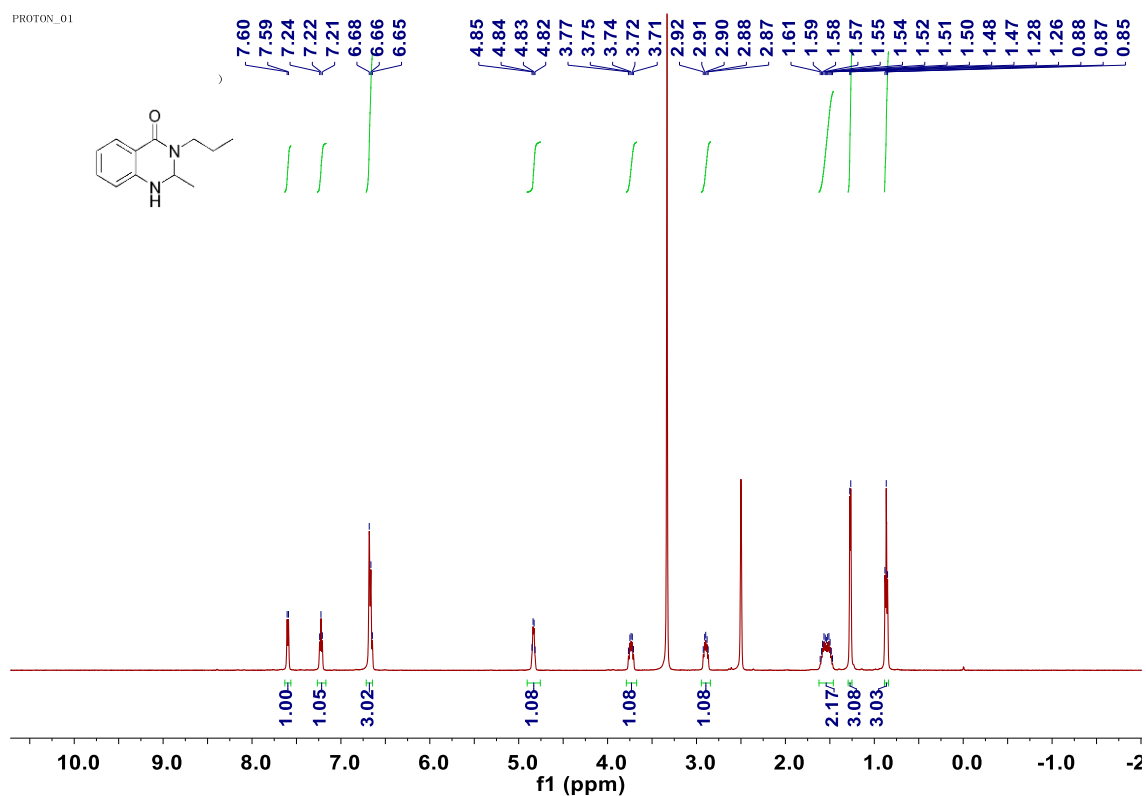

**$^{13}\text{C}\{^1\text{H}\}$  NMR (126 MHz, DMSO- $d_6$ ) of 2-methyl-3-propyl-2,3-dihydroquinazolin-4(1H)-one (3i)**

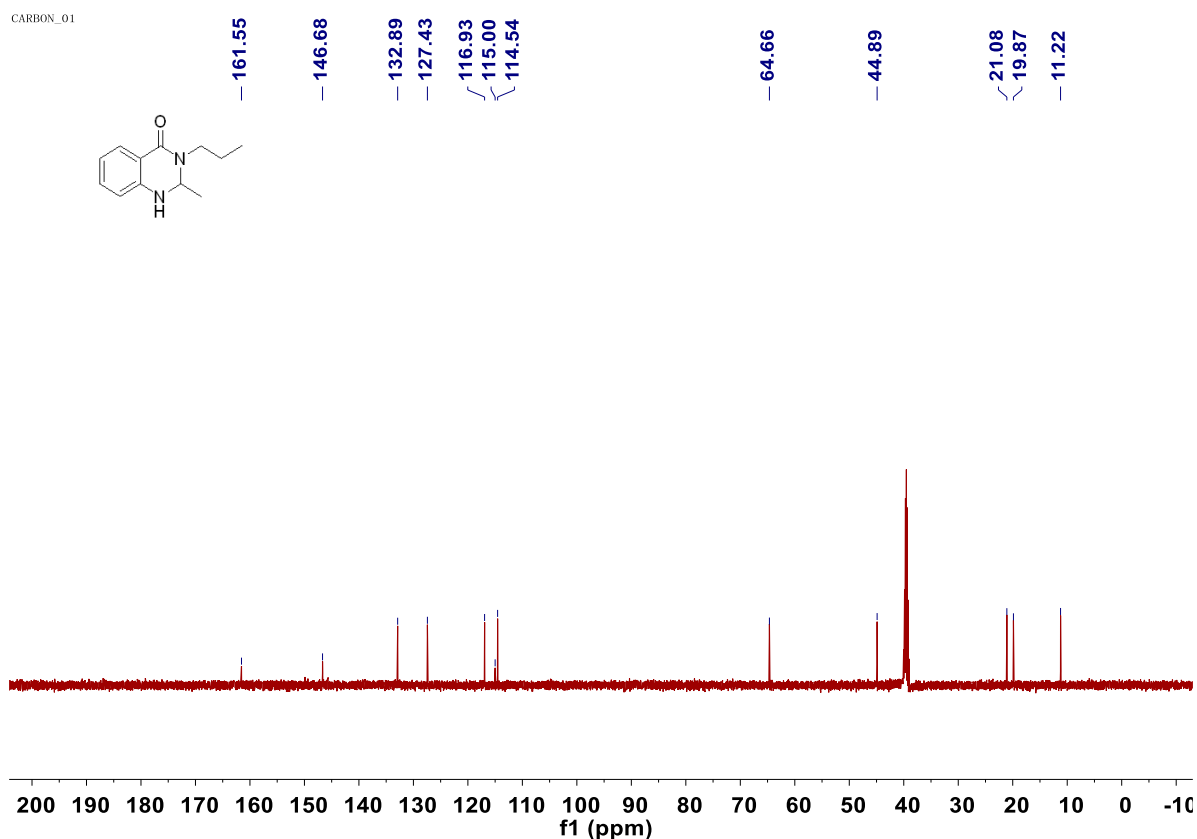

**<sup>1</sup>H NMR (500 MHz, DMSO-*d*<sub>6</sub>) of 3-(4-methoxyphenyl)-2-methyl-2,3-dihydroquinazolin-4(1H)-one (3j)**

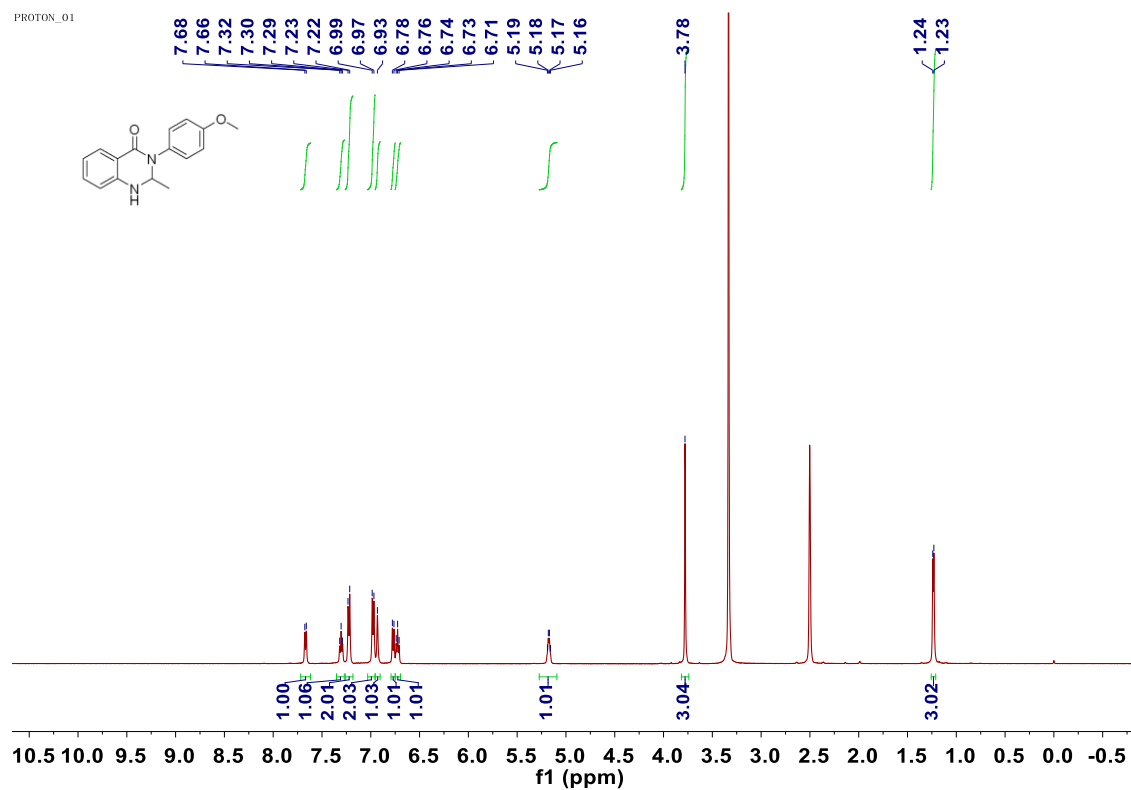

**<sup>13</sup>C{<sup>1</sup>H} NMR (126 MHz, DMSO-*d*<sub>6</sub>) of 3-(4-methoxyphenyl)-2-methyl-2,3-dihydroquinazolin-4(1H)-one (3j)**

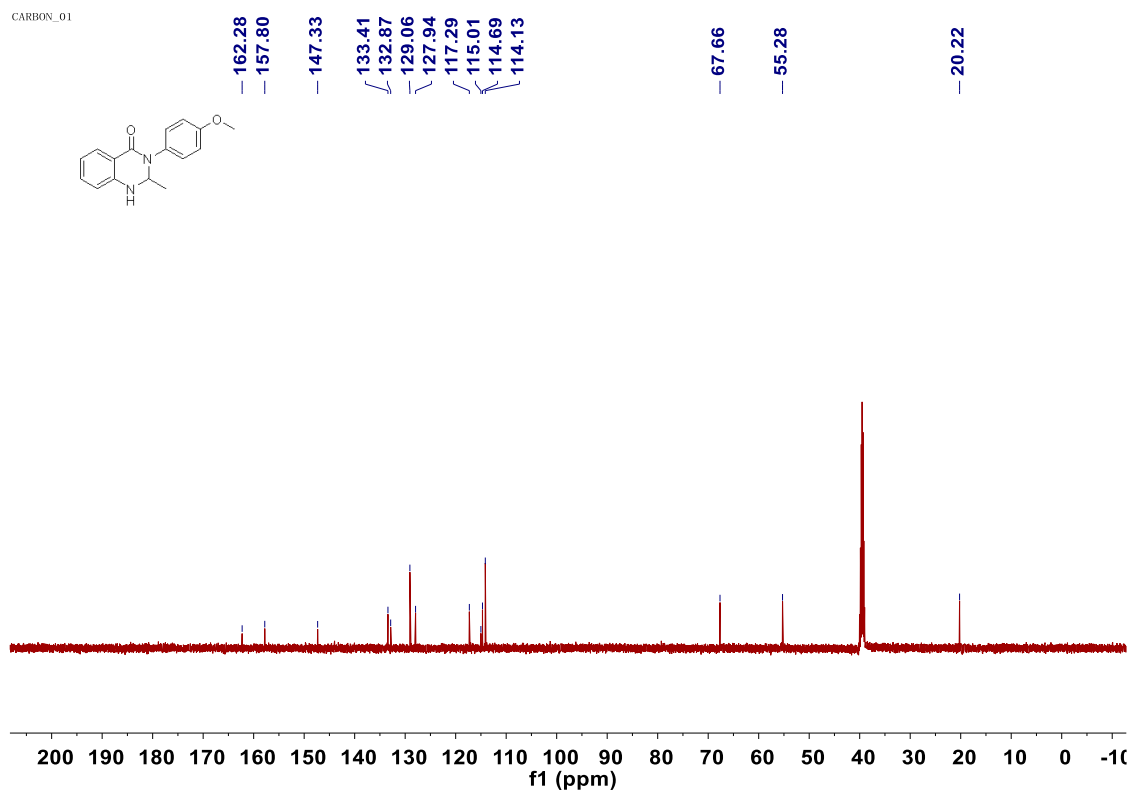



**<sup>1</sup>H NMR (500 MHz, DMSO-*d*<sub>6</sub>) of 3-(4-fluorophenyl)-2-methyl-2,3-dihydroquinazolin-4(1H)-one (3k)**

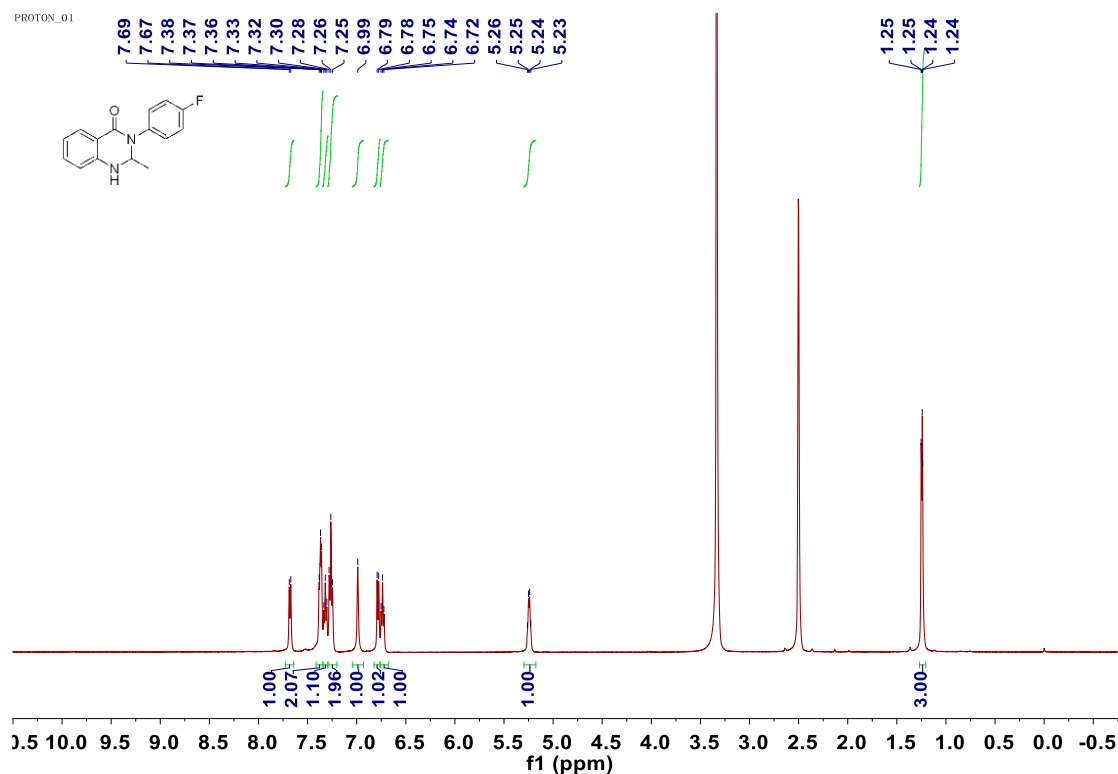

**<sup>13</sup>C{<sup>1</sup>H} NMR (126 MHz, DMSO-*d*<sub>6</sub>) of 3-(4-fluorophenyl)-2-methyl-2,3-dihydroquinazolin-4(1H)-one (3k)**

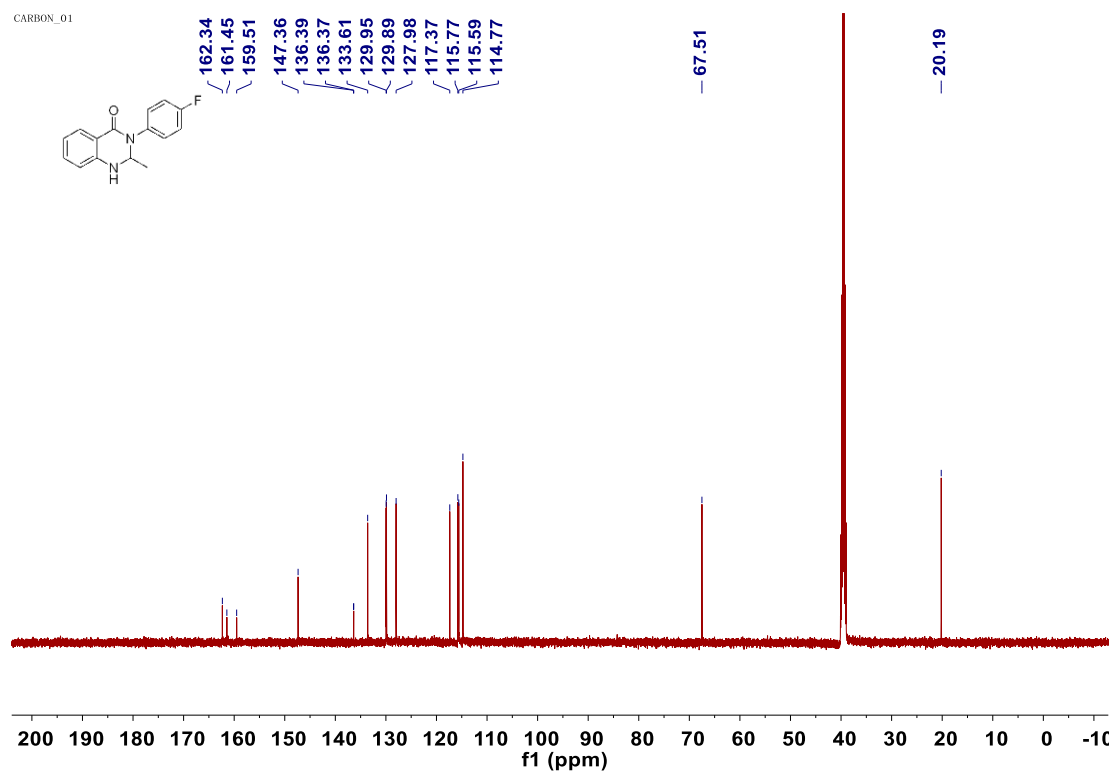

**<sup>19</sup>F NMR (470 MHz, DMSO-*d*<sub>6</sub>) of 3-(4-fluorophenyl)-2-methyl-2,3-dihydroquinazolin-4(1H)-one (3k)**

1sy-3k-F-  
STANDARD FLUORINE PARAMETERS

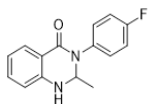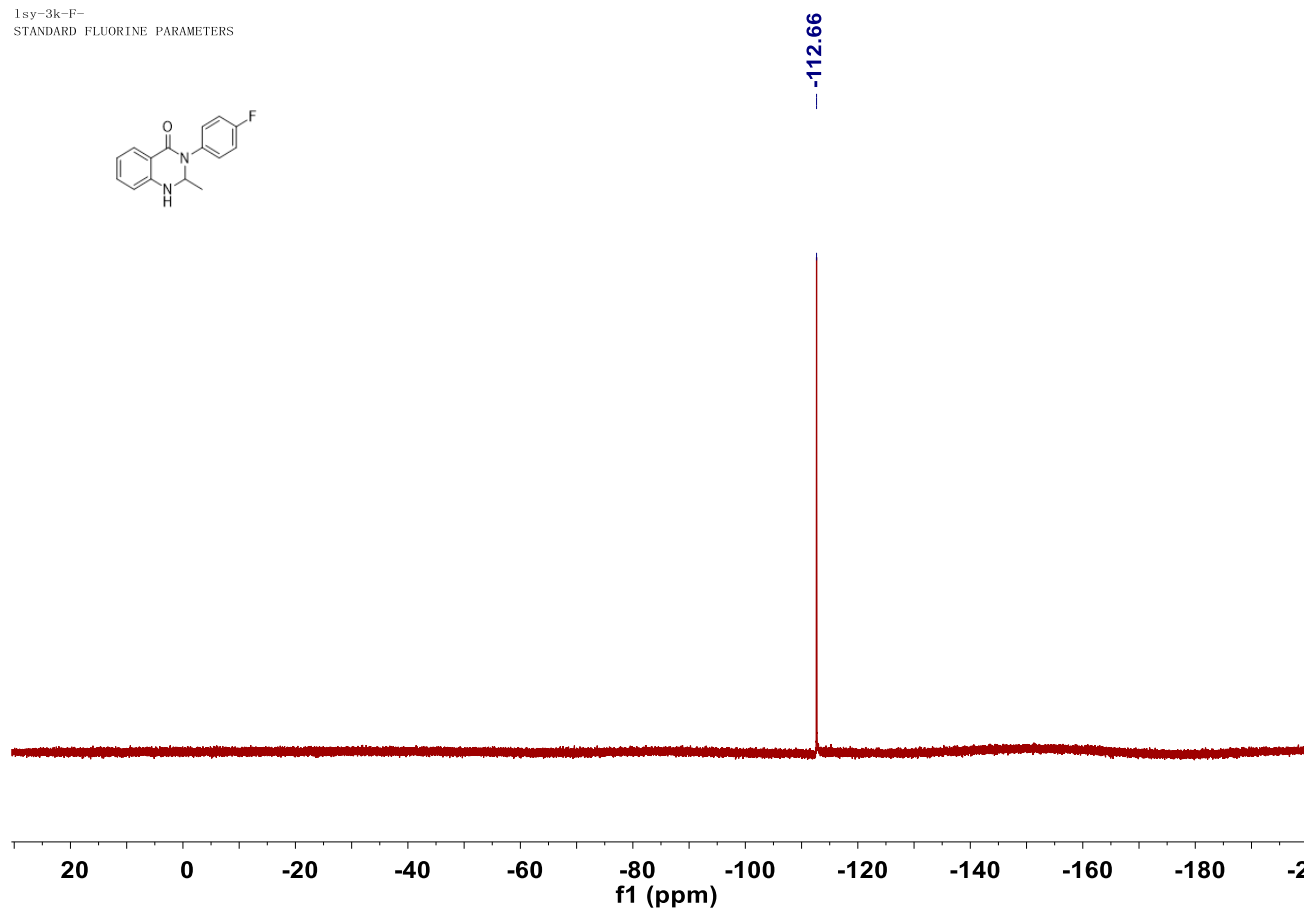

**<sup>1</sup>H NMR (500 MHz, DMSO-*d*<sub>6</sub>) of 3-(4-chlorophenyl)-2-methyl-2,3-dihydroquinazolin-4(1H)-one (3l)**

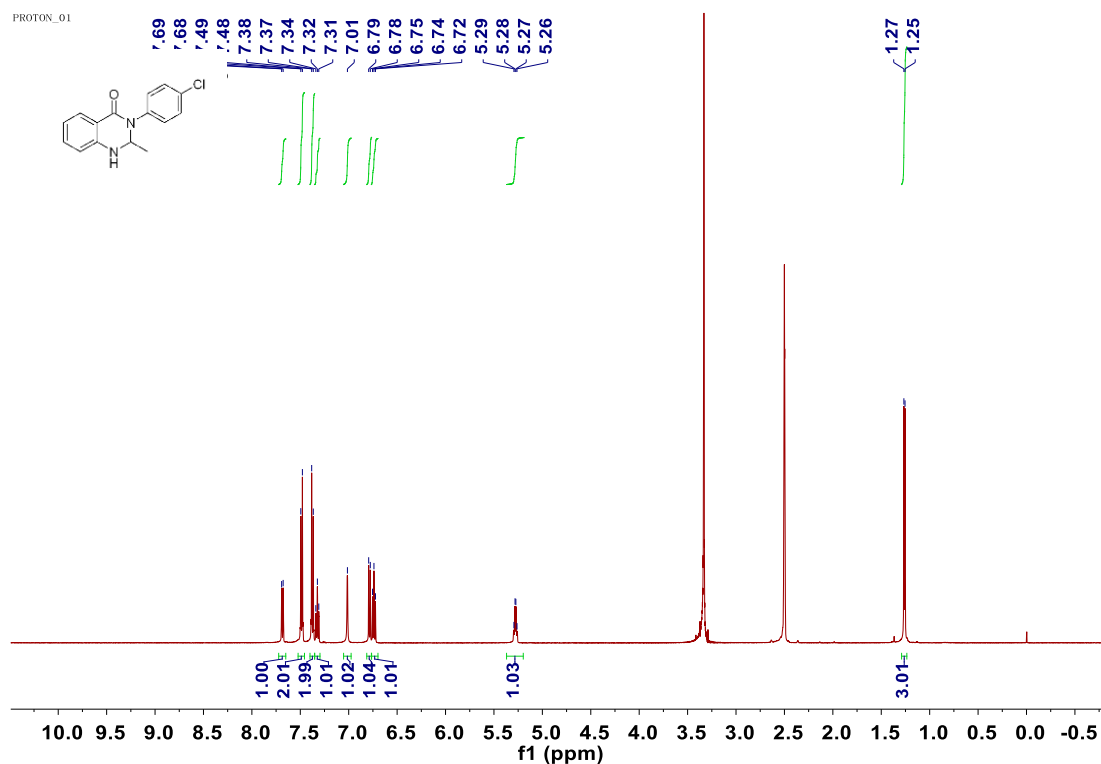

**<sup>13</sup>C{<sup>1</sup>H} NMR (126 MHz, DMSO-*d*<sub>6</sub>) of 3-(4-chlorophenyl)-2-methyl-2,3-dihydroquinazolin-4(1H)-one (3l)**

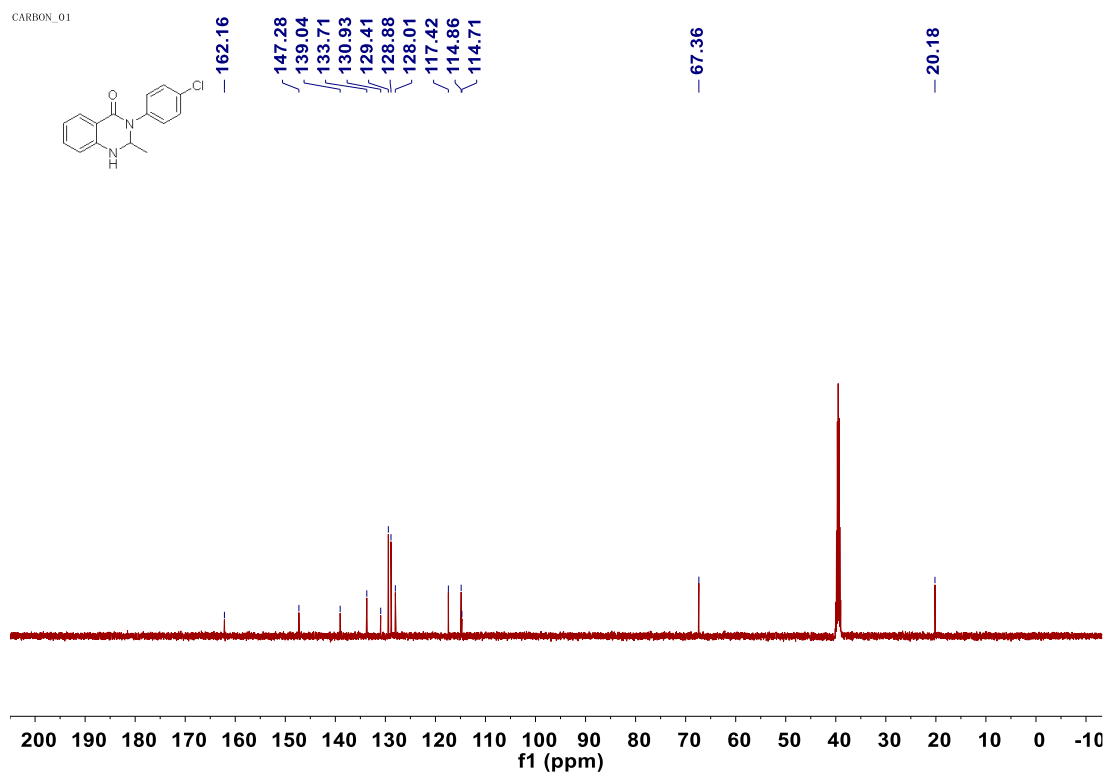

**<sup>1</sup>H NMR (500 MHz, DMSO-*d*<sub>6</sub>) of 2-methyl-3-(*o*-tolyl)-2,3-dihydroquinazolin-4(1H)-one (3m)**

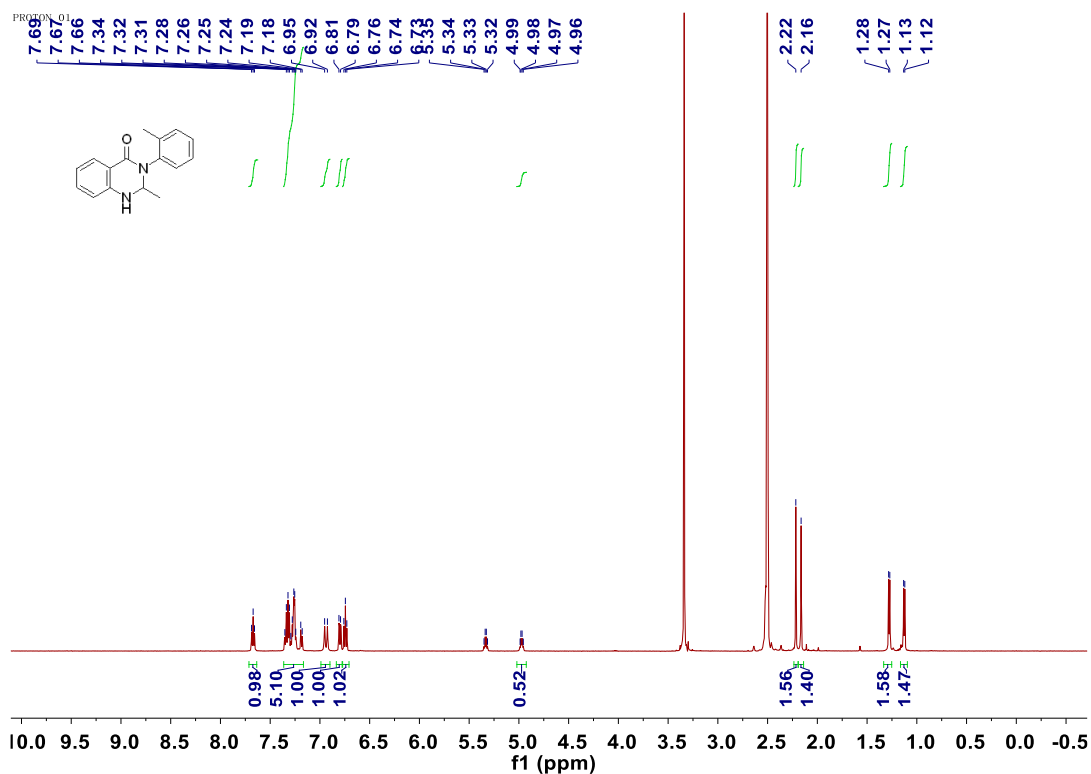

**<sup>13</sup>C{<sup>1</sup>H} NMR (126 MHz, DMSO-*d*<sub>6</sub>) of 2-methyl-3-(*o*-tolyl)-2,3-dihydroquinazolin-4(1H)-one (3m)**

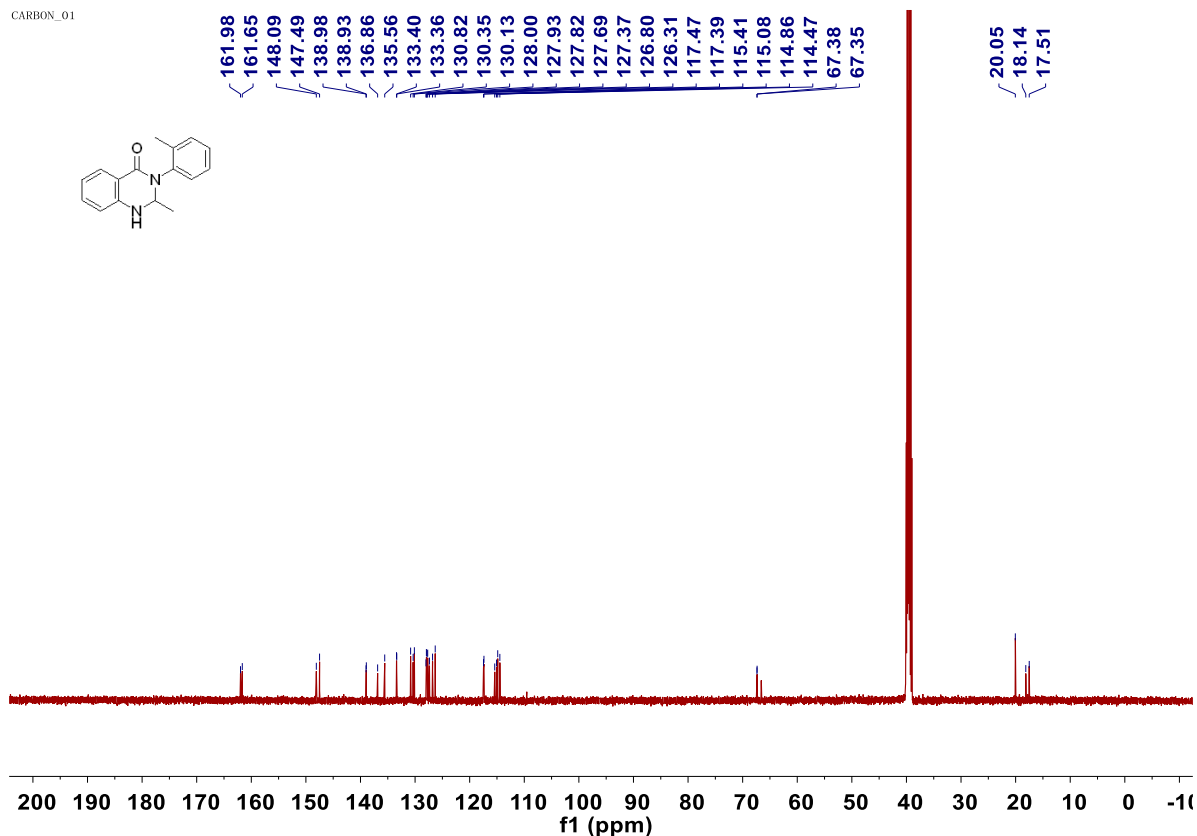

**$^1\text{H}$  NMR (500 MHz,  $\text{DMSO}-d_6$ ) of 3-amino-2-methyl-2,3-dihydroquinazolin-4(1H)-one (3n)**

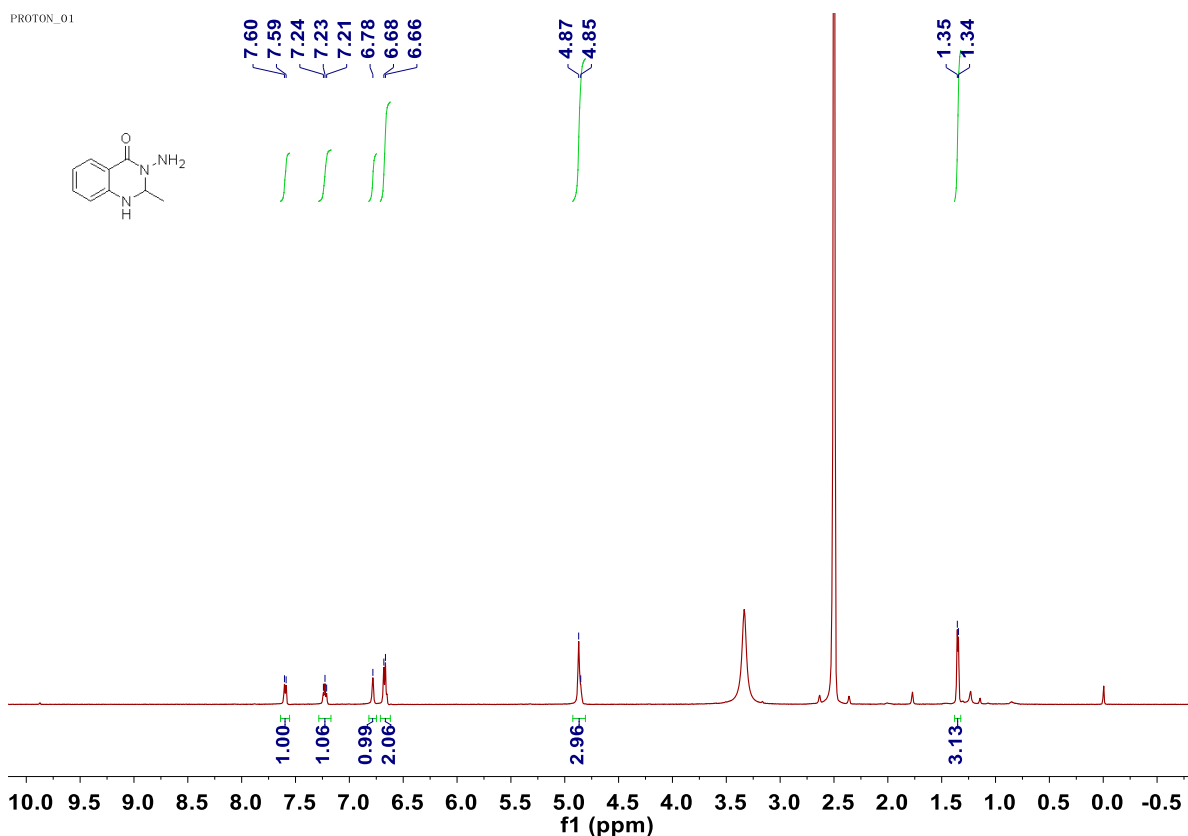

**$^{13}\text{C}\{^1\text{H}\}$  NMR (126 MHz,  $\text{DMSO}-d_6$ ) of 3-amino-2-methyl-2,3-dihydroquinazolin-4(1H)-one (3n)**

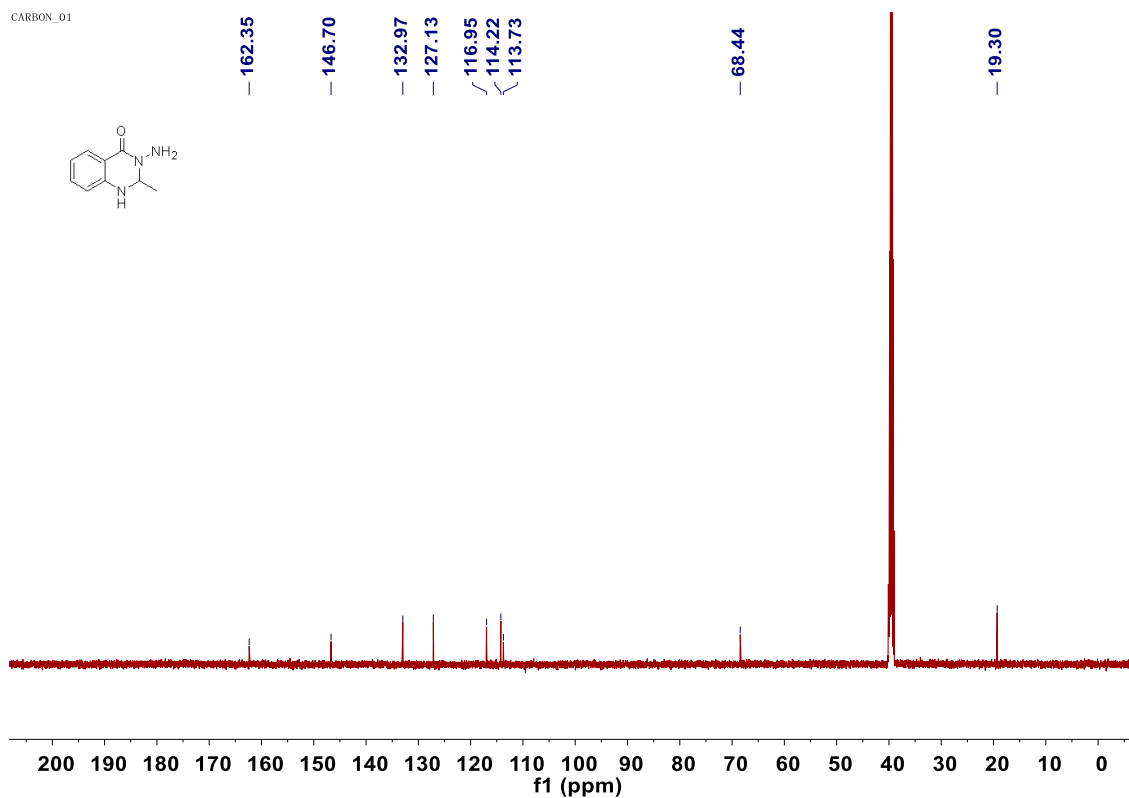

**$^1\text{H}$  NMR (500 MHz,  $\text{DMSO}-d_6$ ) of 1,2-dimethyl-2,3-dihydroquinazolin-4(1H)-one (3o)**

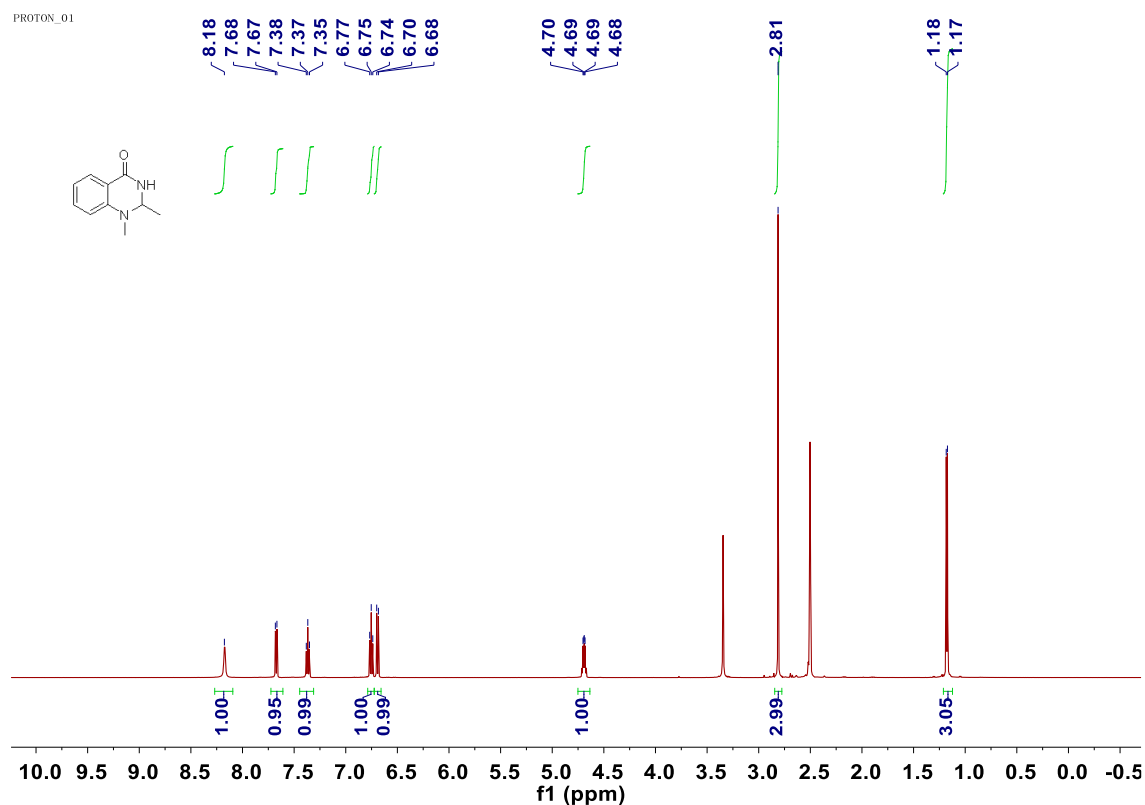

**$^{13}\text{C}\{^1\text{H}\}$  NMR (126 MHz,  $\text{DMSO}-d_6$ ) of 1,2-dimethyl-2,3-dihydroquinazolin-4(1H)-one (3o)**

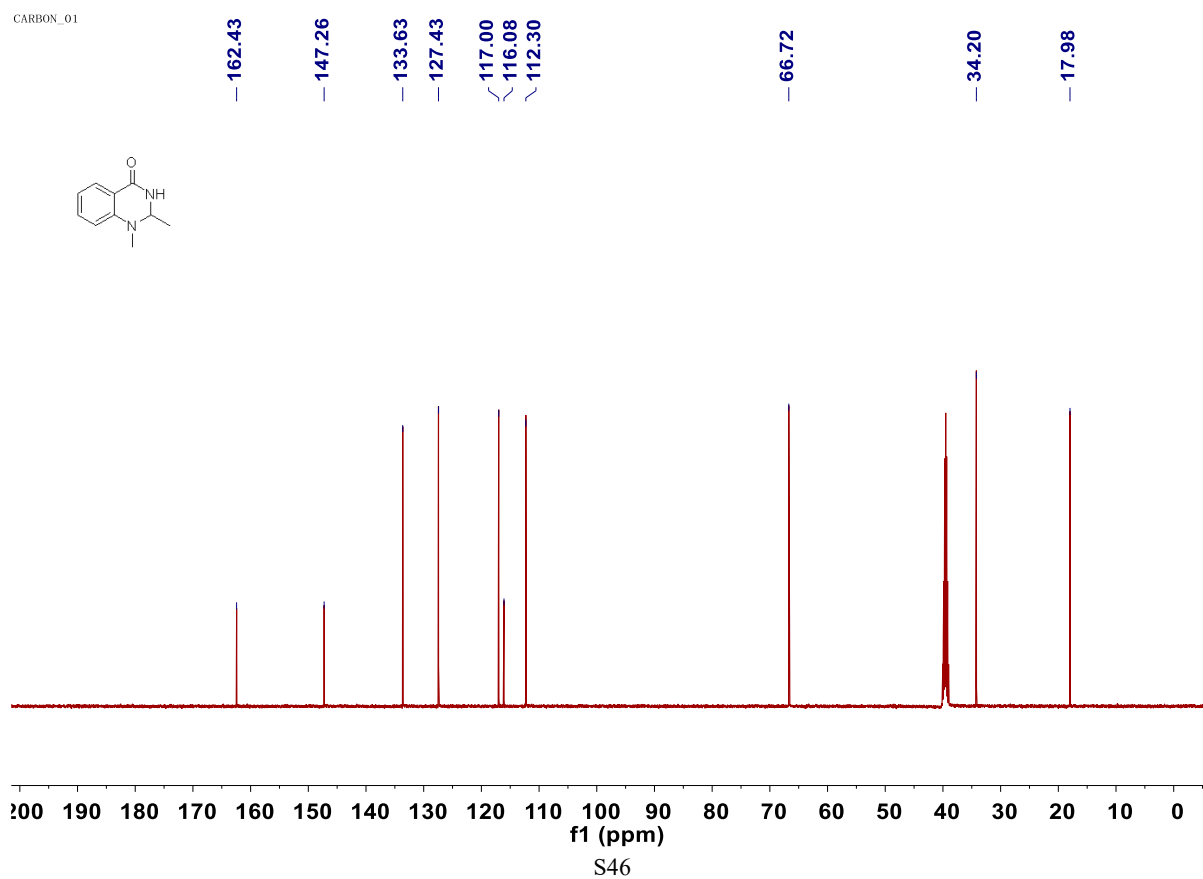

**$^1\text{H}$  NMR (500 MHz, DMSO- $d_6$ ) of 2-methyl-1-phenyl-2,3-dihydroquinazolin-4(1H)-one (3p)**

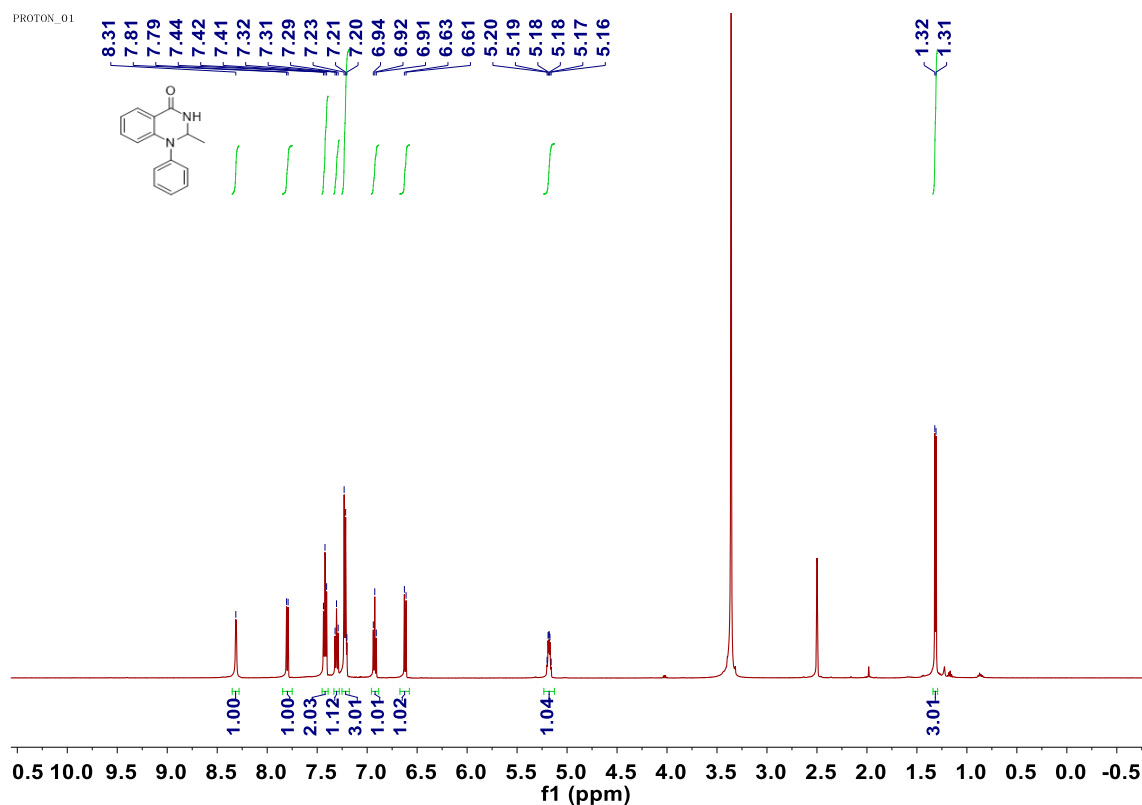

**$^{13}\text{C}\{^1\text{H}\}$  NMR (126 MHz, DMSO- $d_6$ ) of 2-methyl-1-phenyl-2,3-dihydroquinazolin-4(1H)-one (3p)**

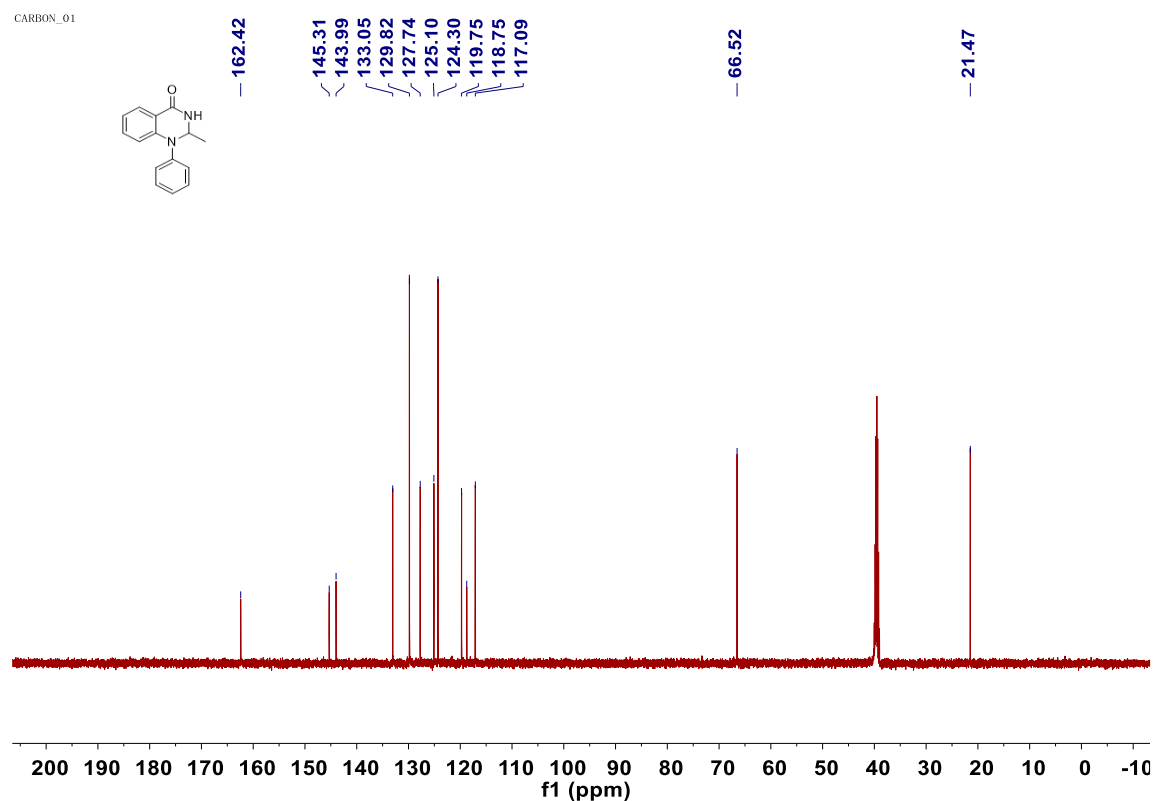

**<sup>1</sup>H NMR (500 MHz, DMSO-*d*<sub>6</sub>) of 2,5-dimethyl-2,3-dihydroquinazolin-4(1H)-one (3s)**

PROTON\_01

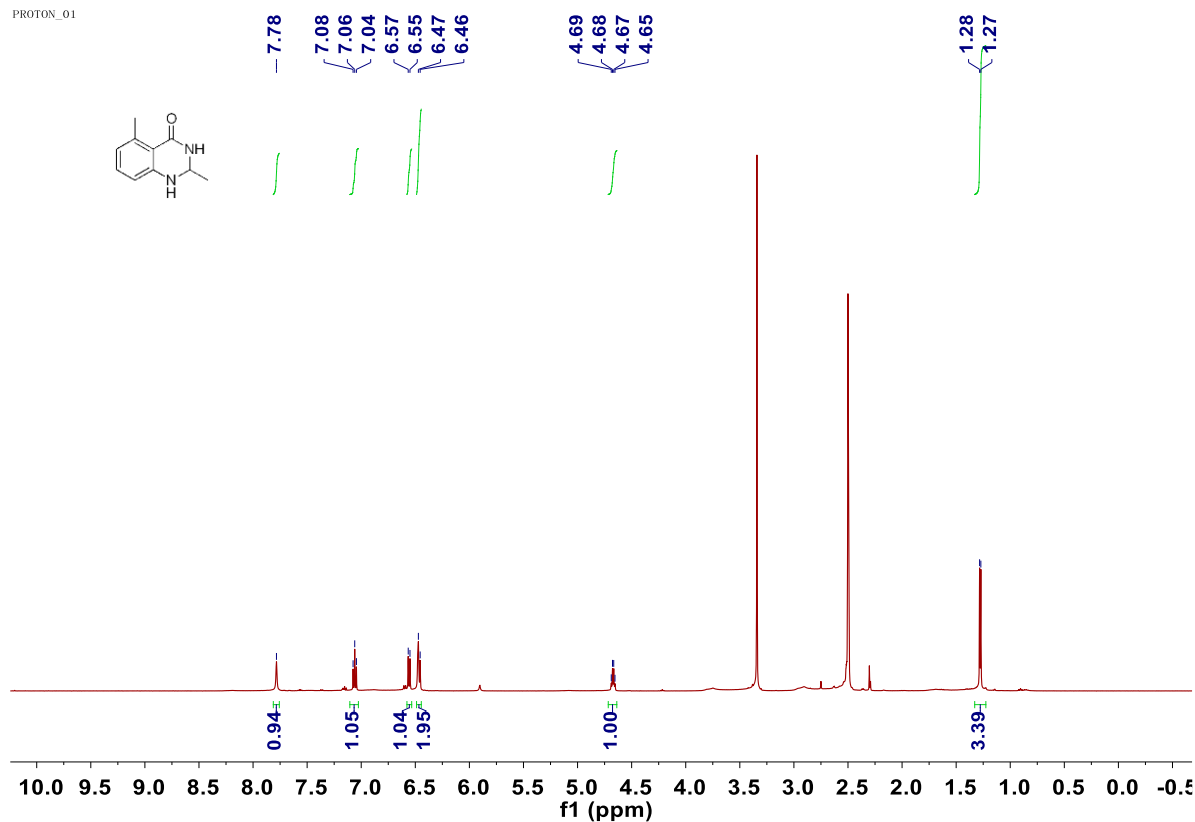

**<sup>13</sup>C{<sup>1</sup>H} NMR (126 MHz, DMSO-*d*<sub>6</sub>) of 2,5-dimethyl-2,3-dihydroquinazolin-4(1H)-one (3s)**

CARBON\_01

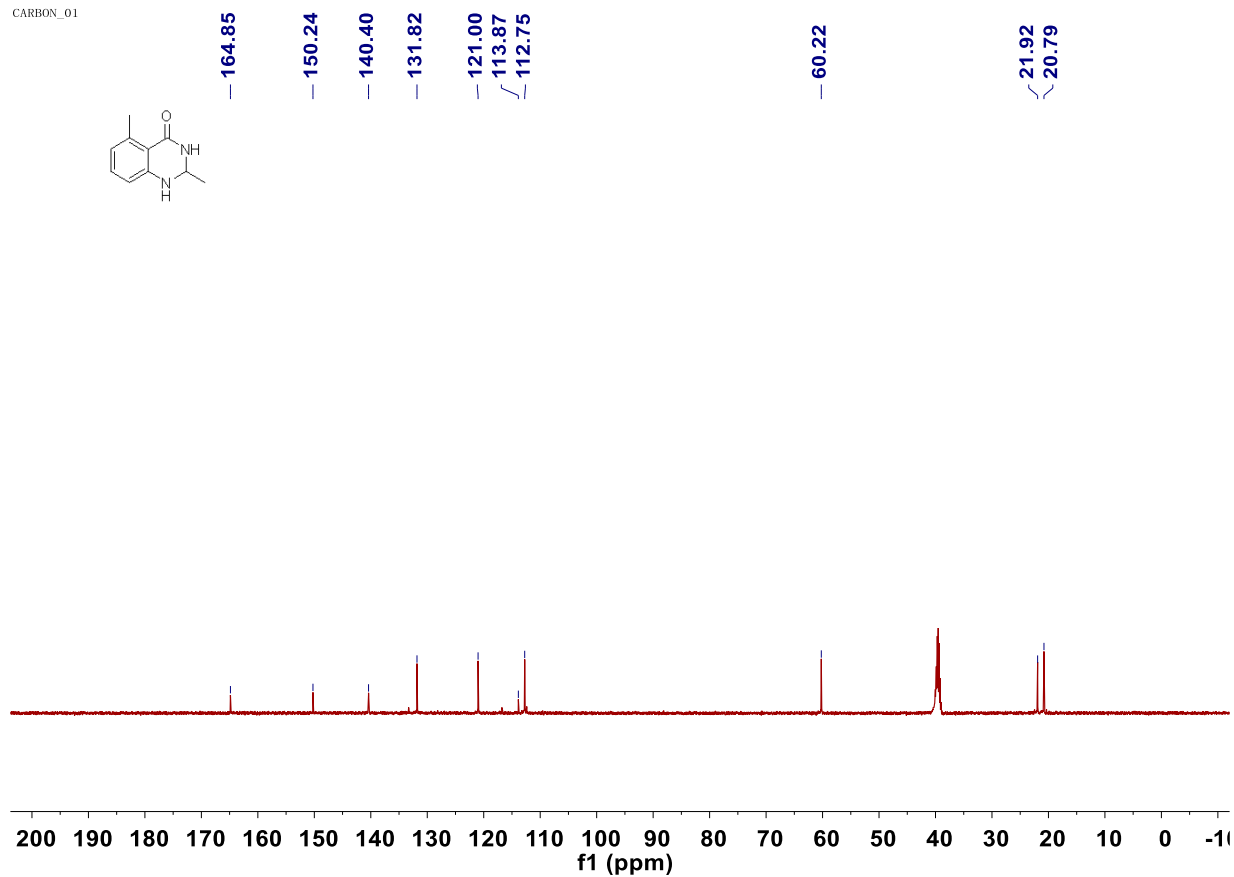



**<sup>1</sup>H NMR (500 MHz, DMSO-*d*<sub>6</sub>) of 5-chloro-2-methyl-2,3-dihydroquinazolin-4(1H)-one (3t)**

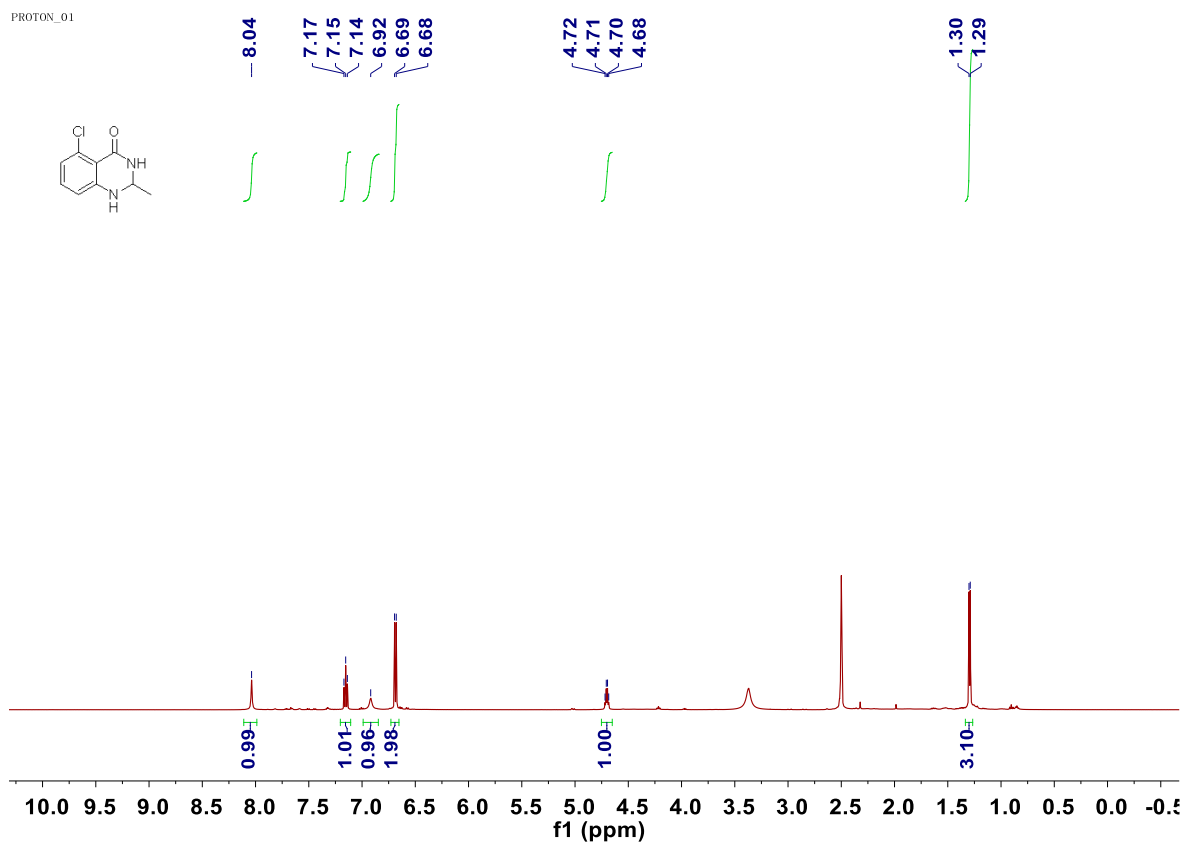

**<sup>13</sup>C{<sup>1</sup>H} NMR (126 MHz, DMSO-*d*<sub>6</sub>) of 5-chloro-2-methyl-2,3-dihydroquinazolin-4(1H)-one (3t)**

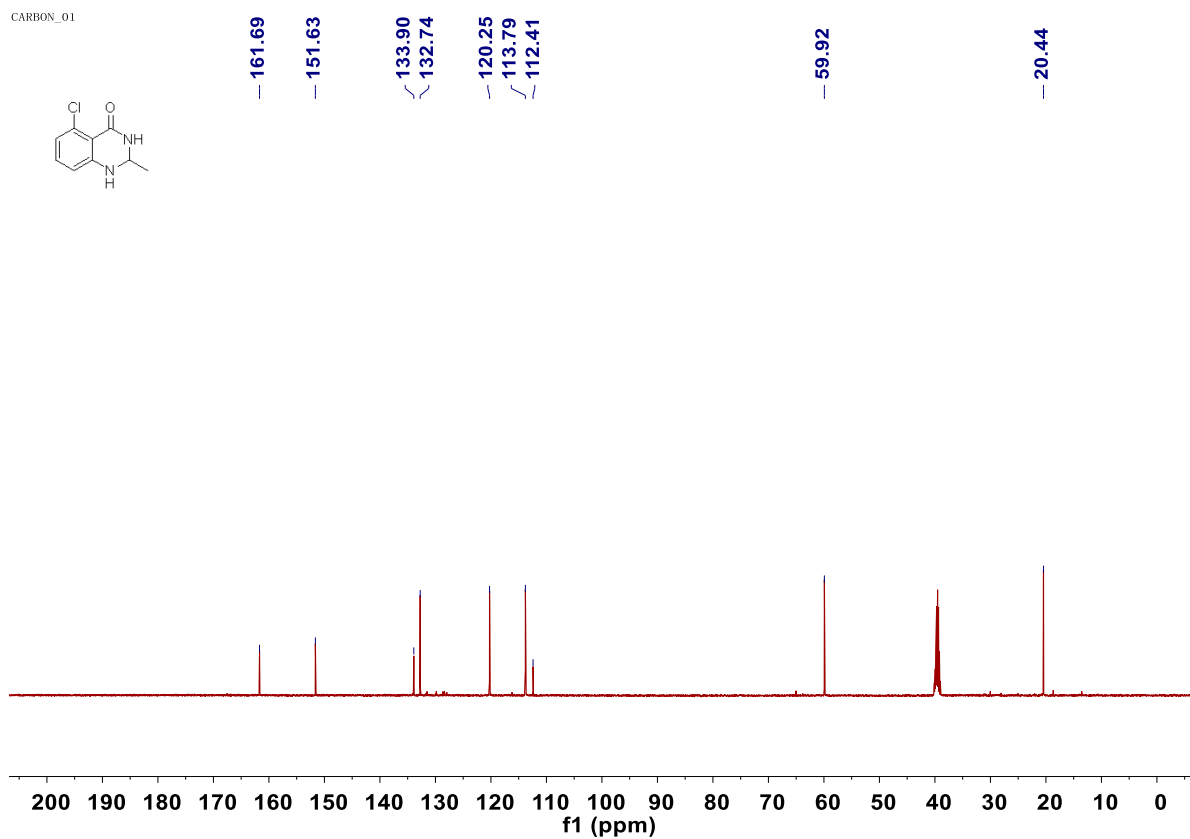

**<sup>1</sup>H NMR (500 MHz, DMSO-*d*<sub>6</sub>) of 5-bromo-2-methyl-2,3-dihydroquinazolin-4(1H)-one (3u)**

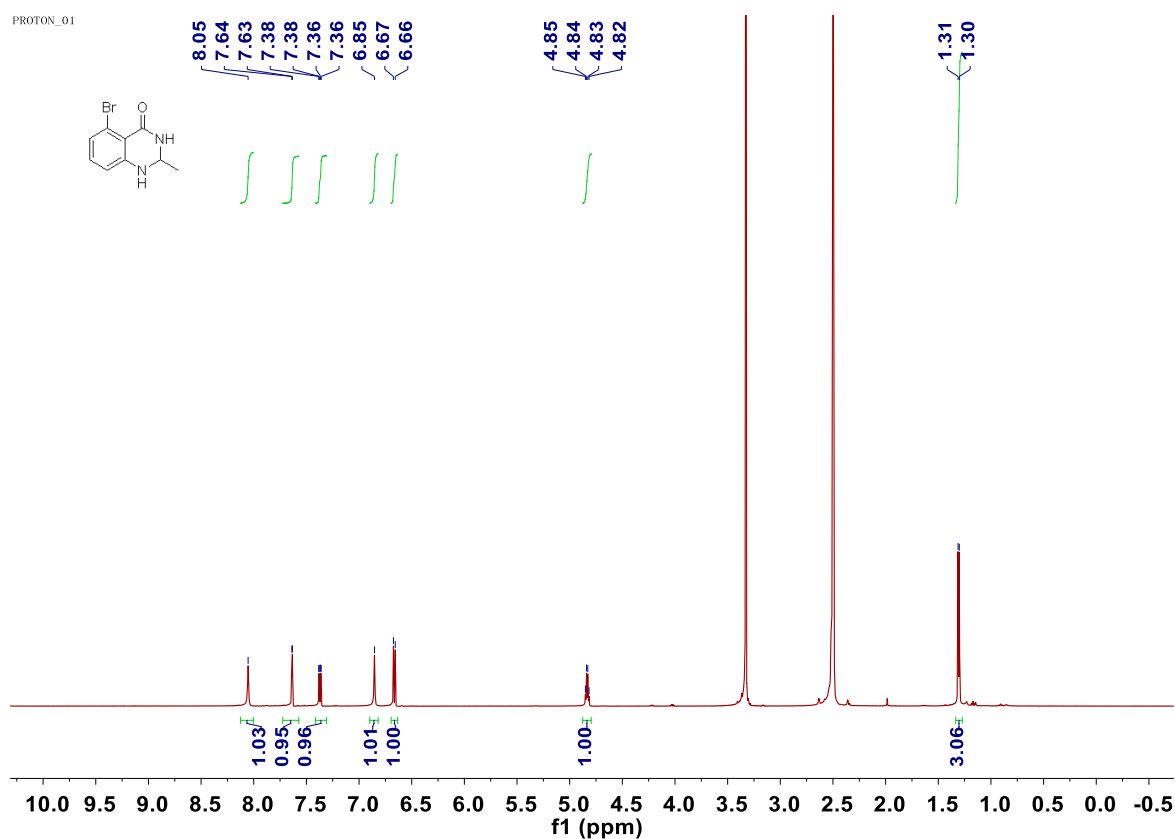

**<sup>13</sup>C{<sup>1</sup>H} NMR (126 MHz, DMSO-*d*<sub>6</sub>) of 5-bromo-2-methyl-2,3-dihydroquinazolin-4(1H)-one (3u)**

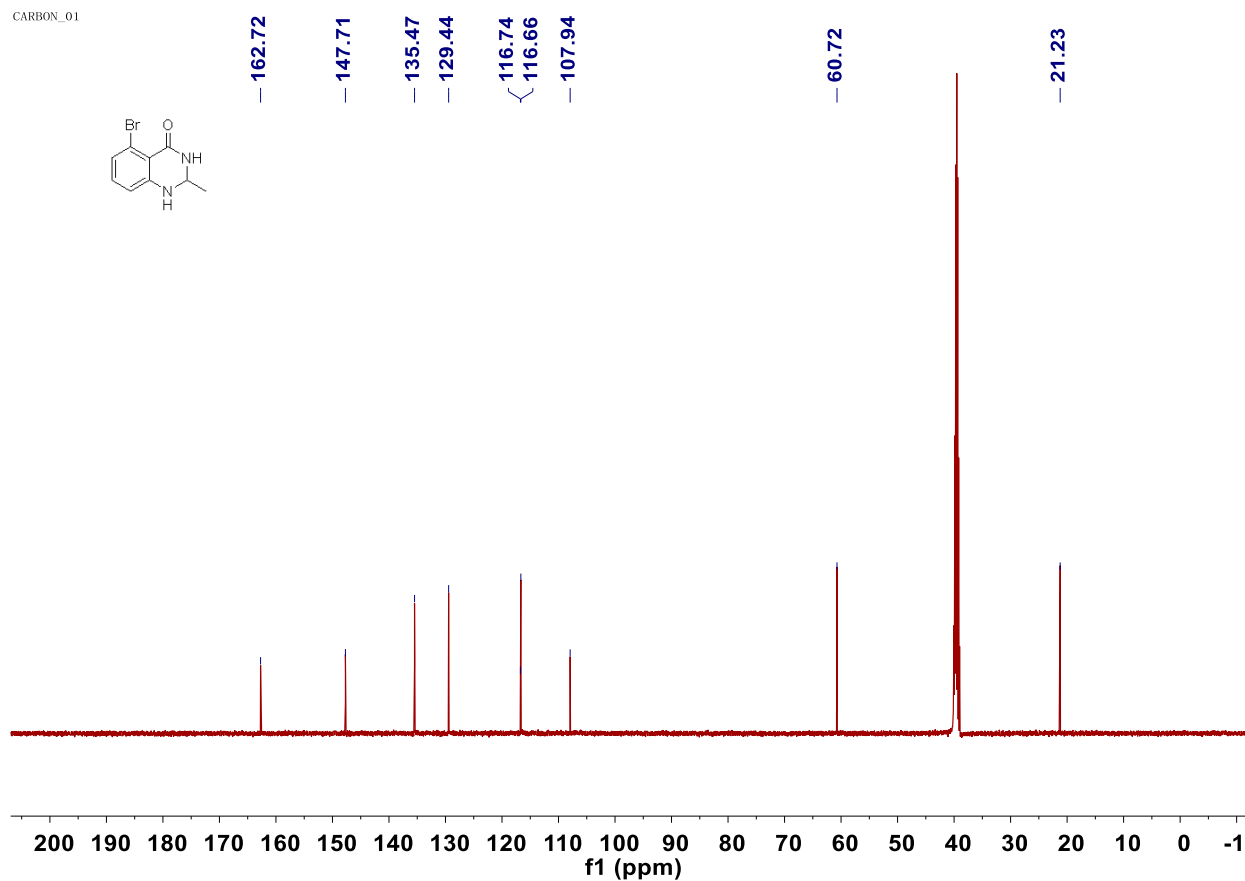

**$^1\text{H}$  NMR (500 MHz,  $\text{DMSO}-d_6$ ) of 2,6-dimethyl-2,3-dihydroquinazolin-4(1H)-one (3v)**

PROTON\_01

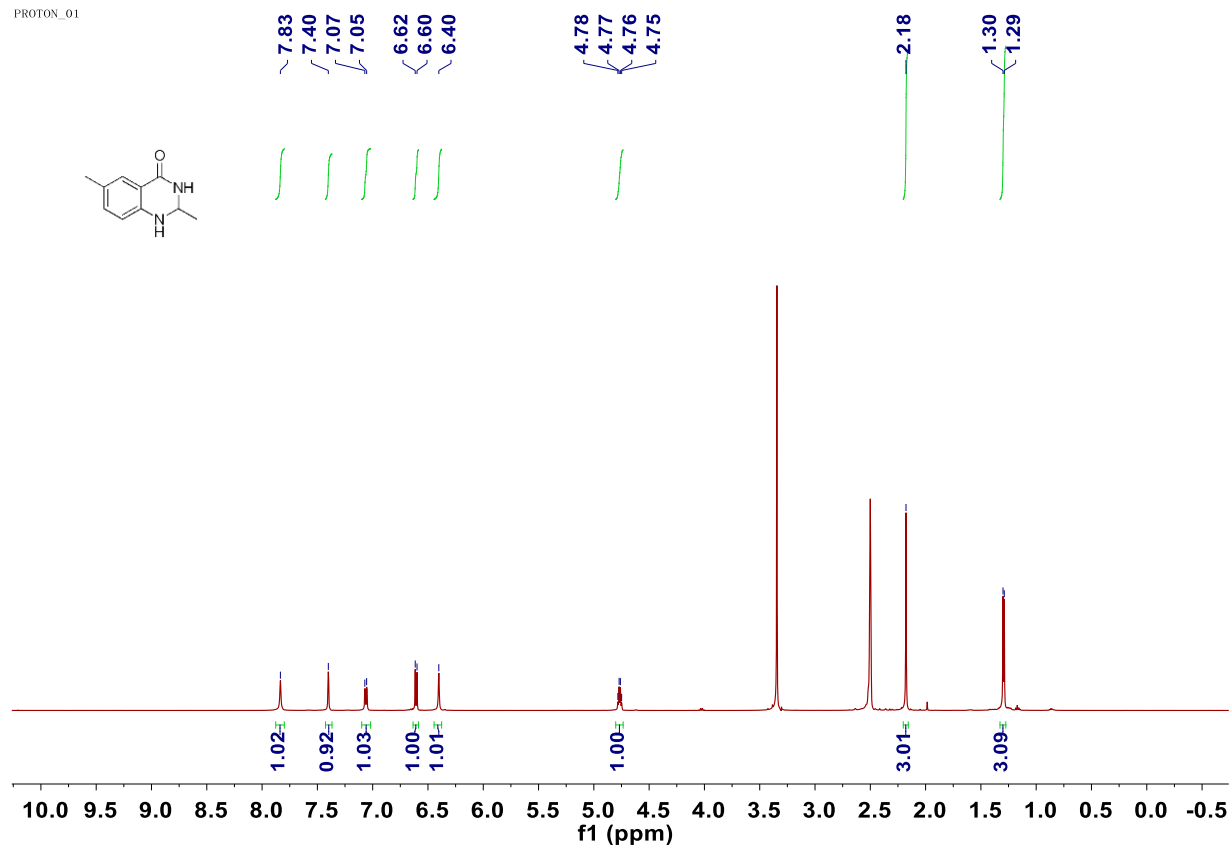

**$^{13}\text{C}\{^1\text{H}\}$  NMR (126 MHz,  $\text{DMSO}-d_6$ ) of 2,6-dimethyl-2,3-dihydroquinazolin-4(1H)-one (3v)**

CARBON\_01

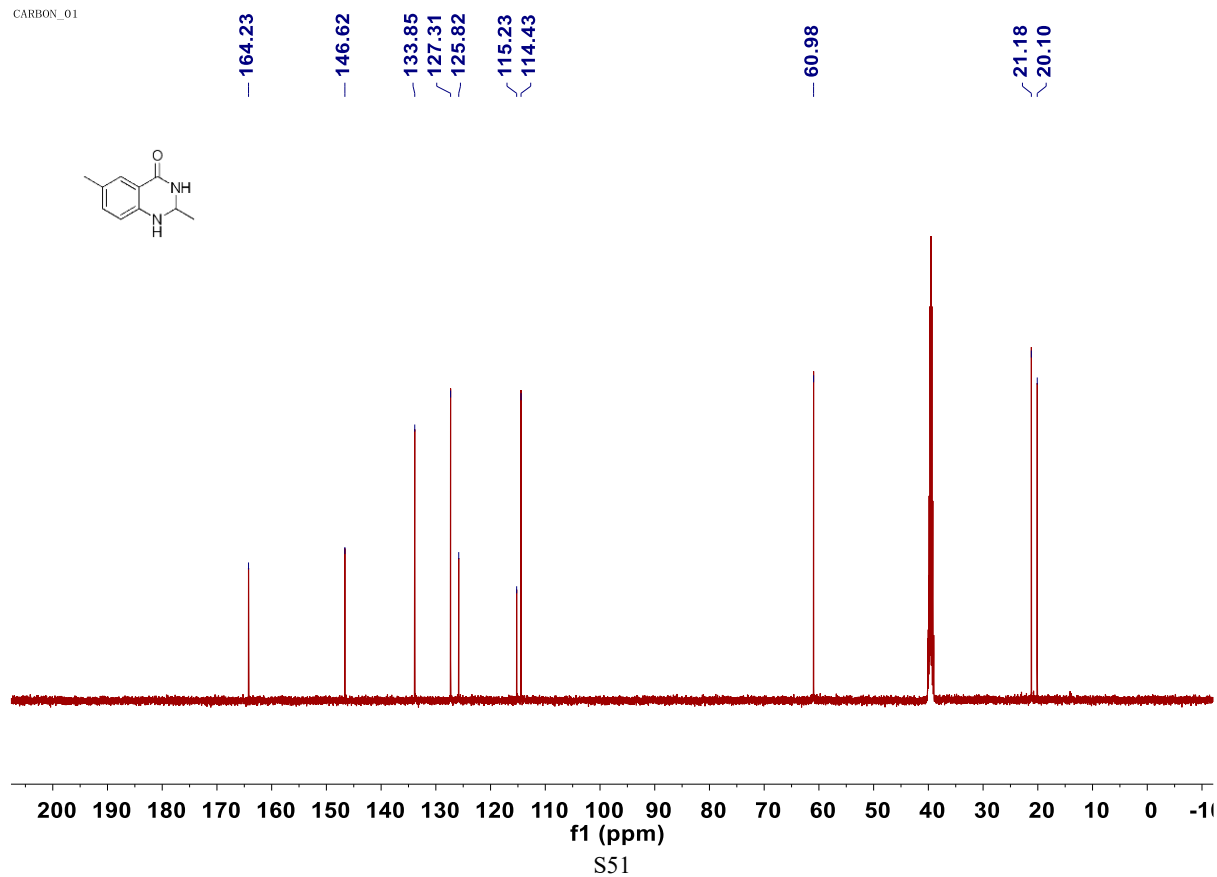

**$^1\text{H}$  NMR (500 MHz,  $\text{DMSO}-d_6$ ) of 6-methoxy-2-methyl-2,3-dihydroquinazolin-4(1H)-one (3w)**

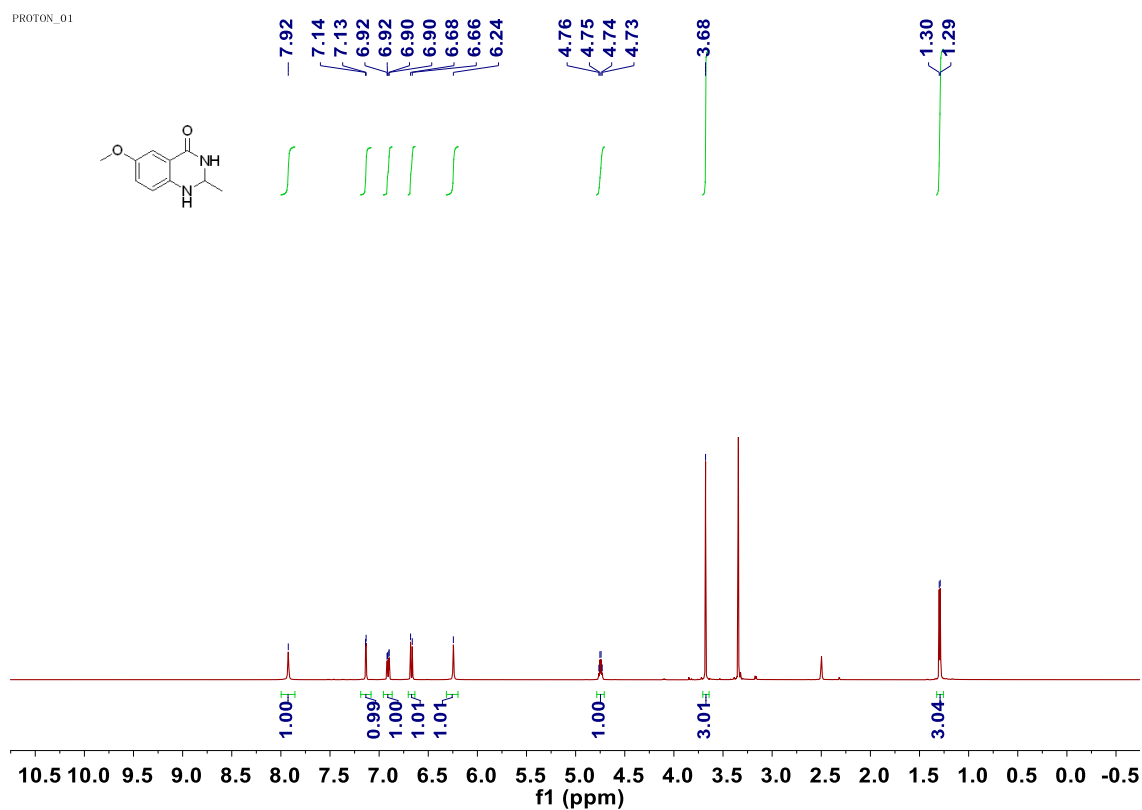

**$^{13}\text{C}\{^1\text{H}\}$  NMR (126 MHz,  $\text{DMSO}-d_6$ ) of 6-methoxy-2-methyl-2,3-dihydroquinazolin-4(1H)-one (3w)**

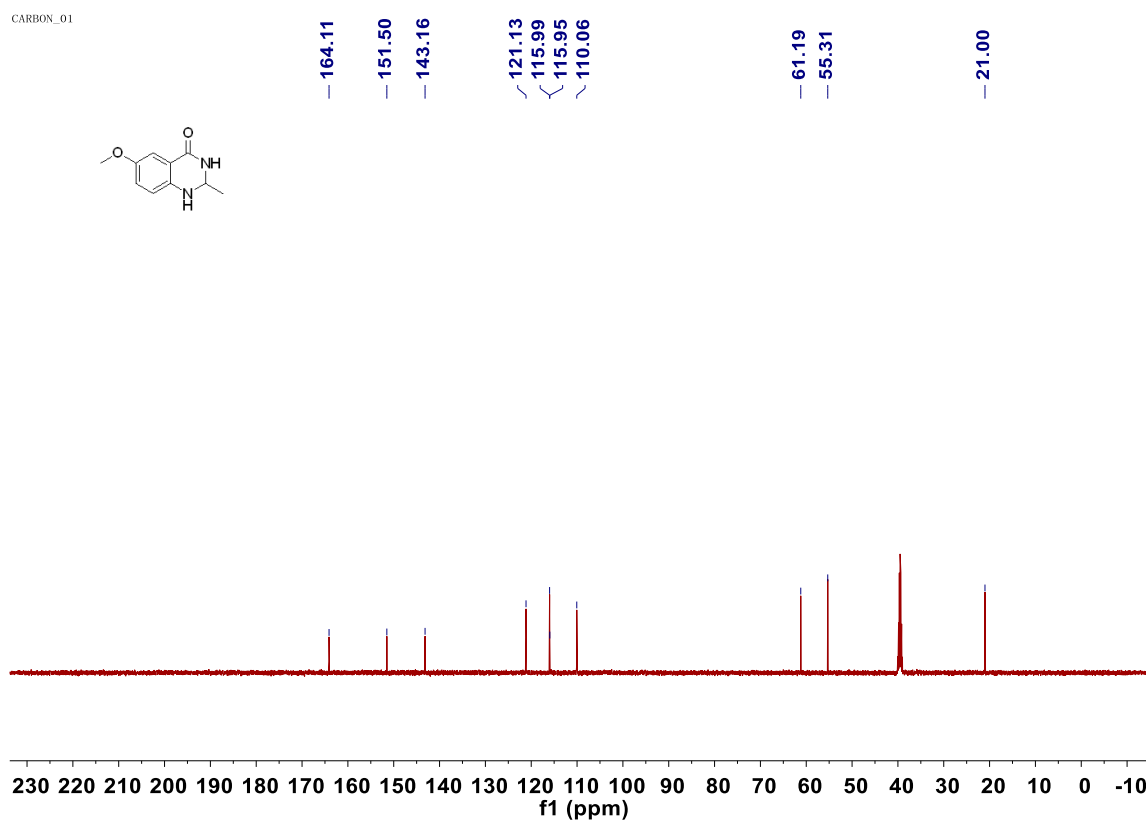

**<sup>1</sup>H NMR (500 MHz, DMSO-*d*<sub>6</sub>) of 2-methyl-4-oxo-1,2,3,4-tetrahydroquinazoline-6-carbonitrile (3x)**

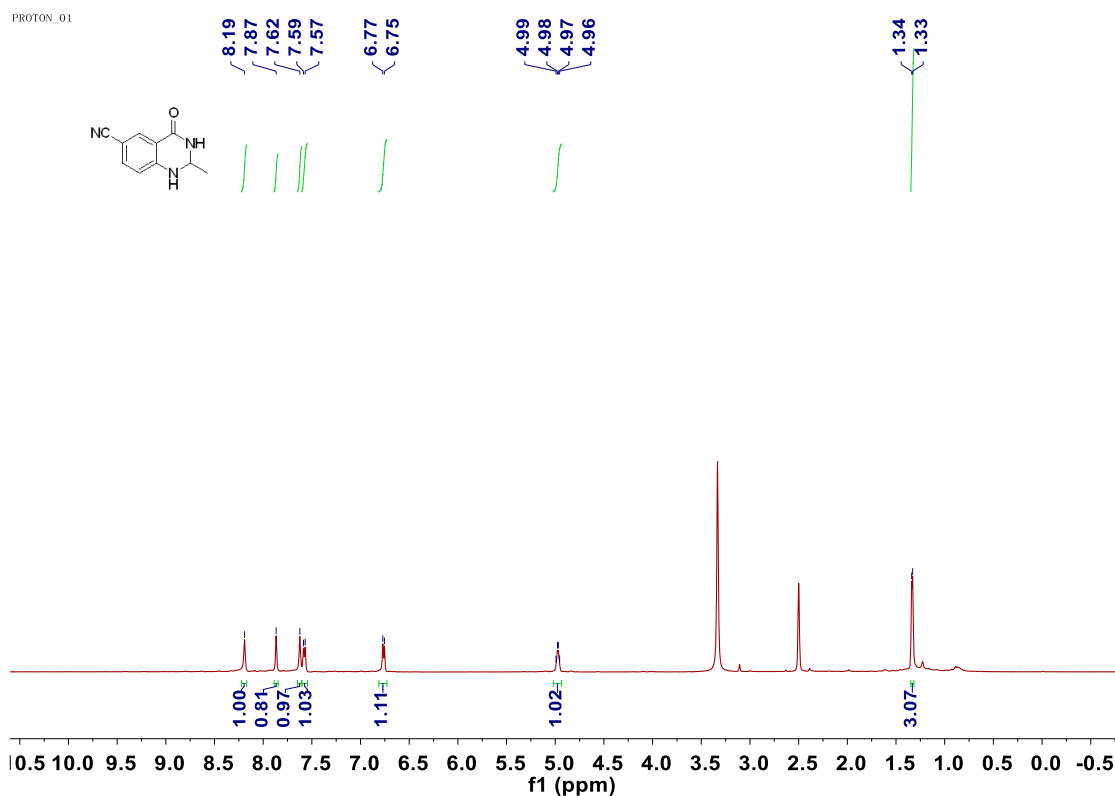

**<sup>13</sup>C{<sup>1</sup>H} NMR (126 MHz, DMSO-*d*<sub>6</sub>) of 2-methyl-4-oxo-1,2,3,4-tetrahydroquinazoline-6-carbonitrile (3x)**

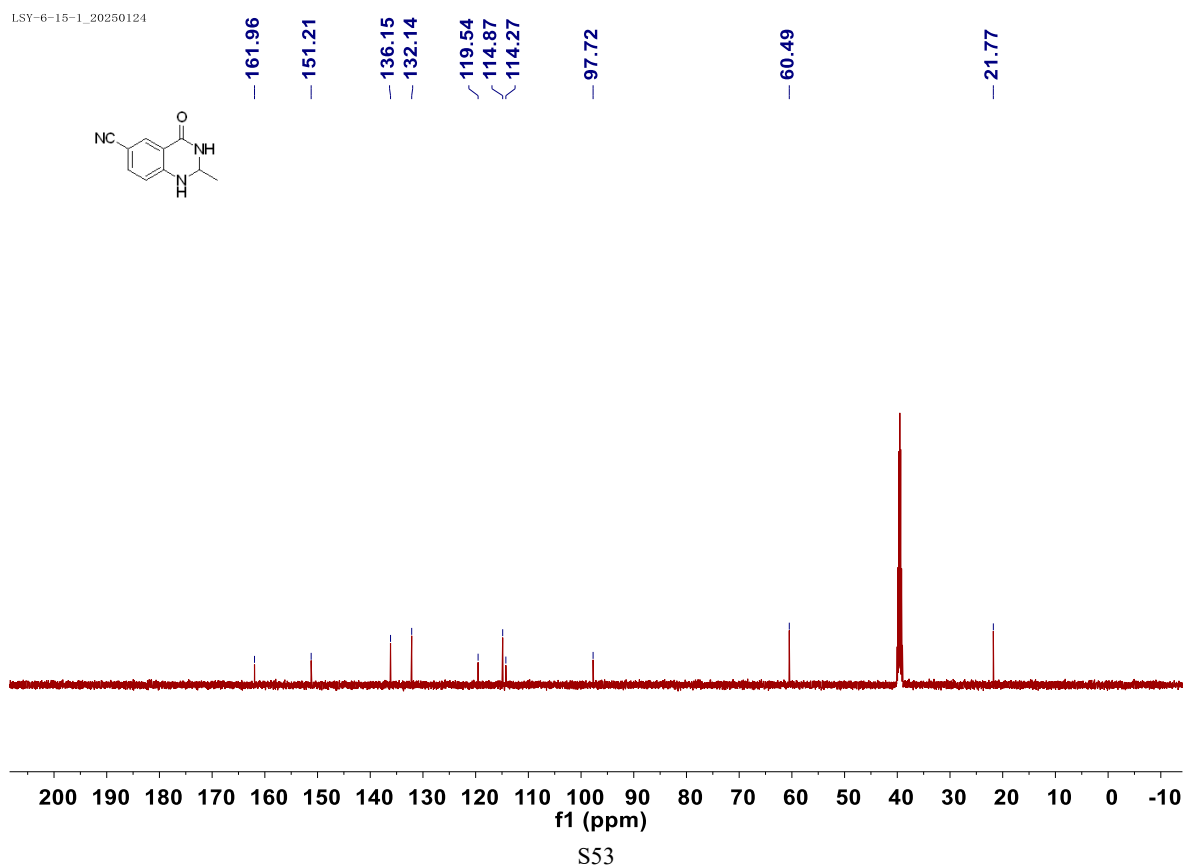

**<sup>1</sup>H NMR (500 MHz, DMSO-*d*<sub>6</sub>) of 2-methyl-6-(trifluoromethyl)-2,3-dihydroquinazolin-4(1H)-one (3z)**

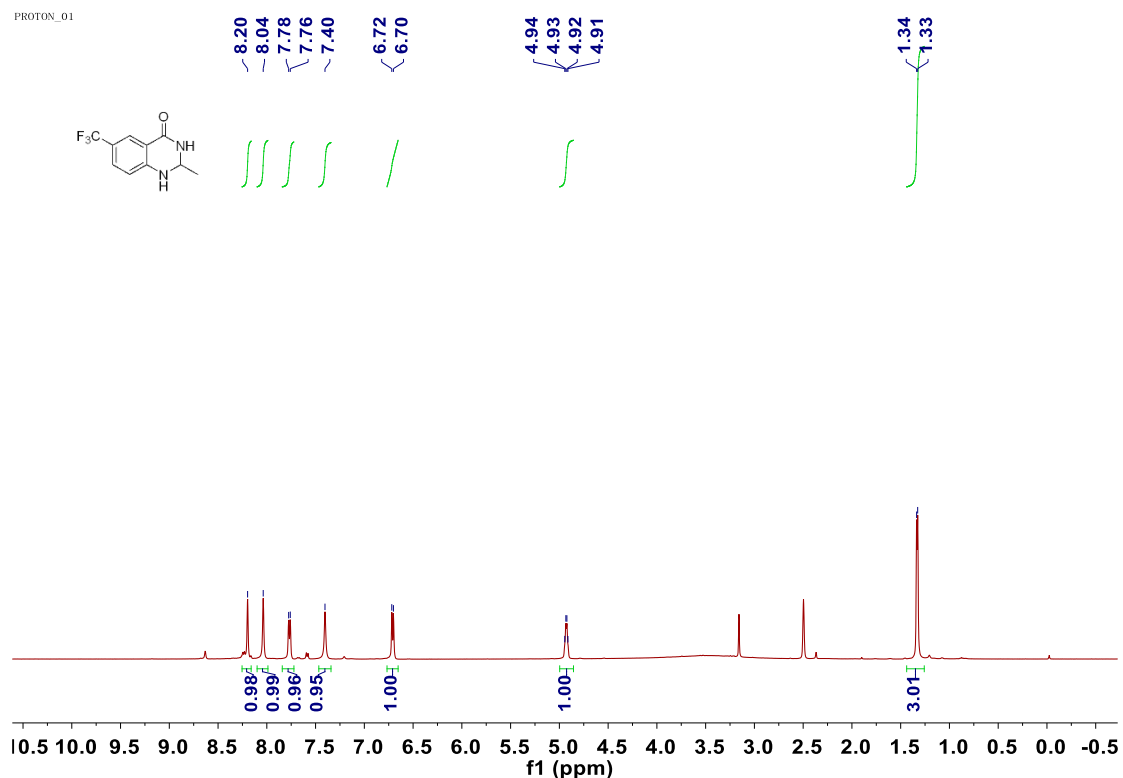

**<sup>13</sup>C{<sup>1</sup>H} NMR (126 MHz, DMSO-*d*<sub>6</sub>) of 2-methyl-6-(trifluoromethyl)-2,3-dihydroquinazolin-4(1H)-one (3z)**

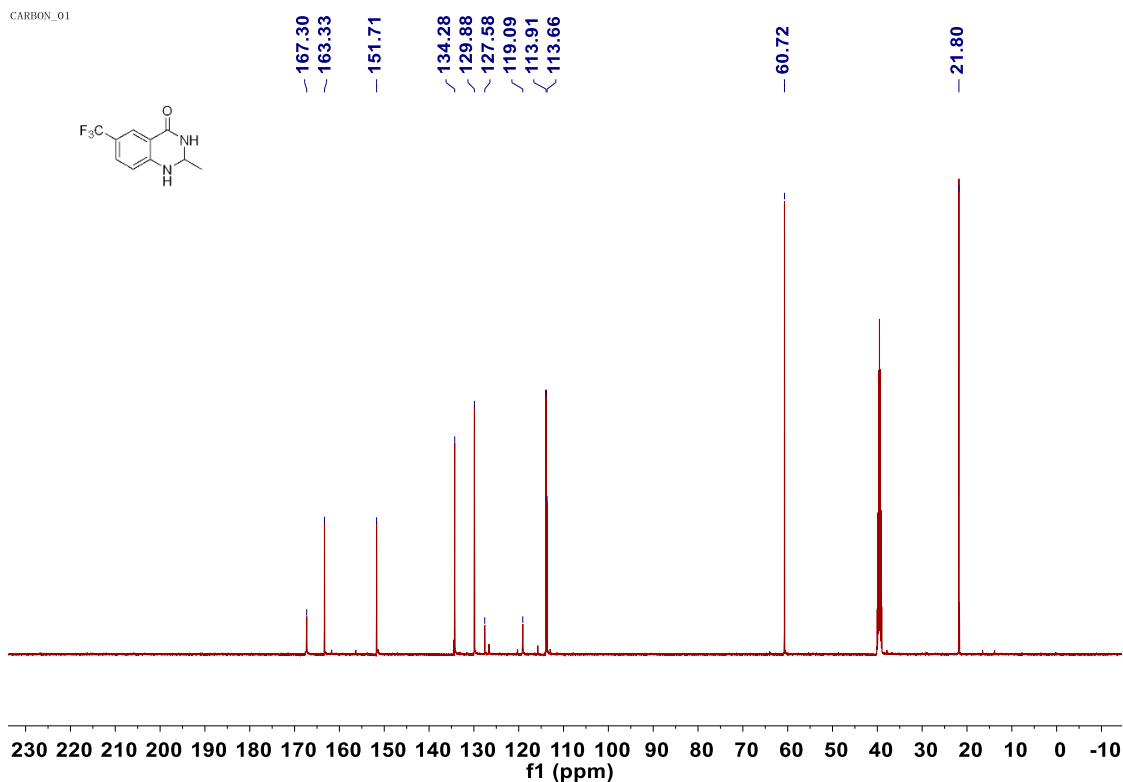

**<sup>19</sup>F NMR (470 MHz, DMSO-*d*<sub>6</sub>) of 2-methyl-6-(trifluoromethyl)-2,3-dihydroquinazolin-4(1H)-one (3z)**

LSY-6-60-3-F  
STANDARD FLUORINE PARAMETERS

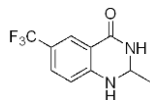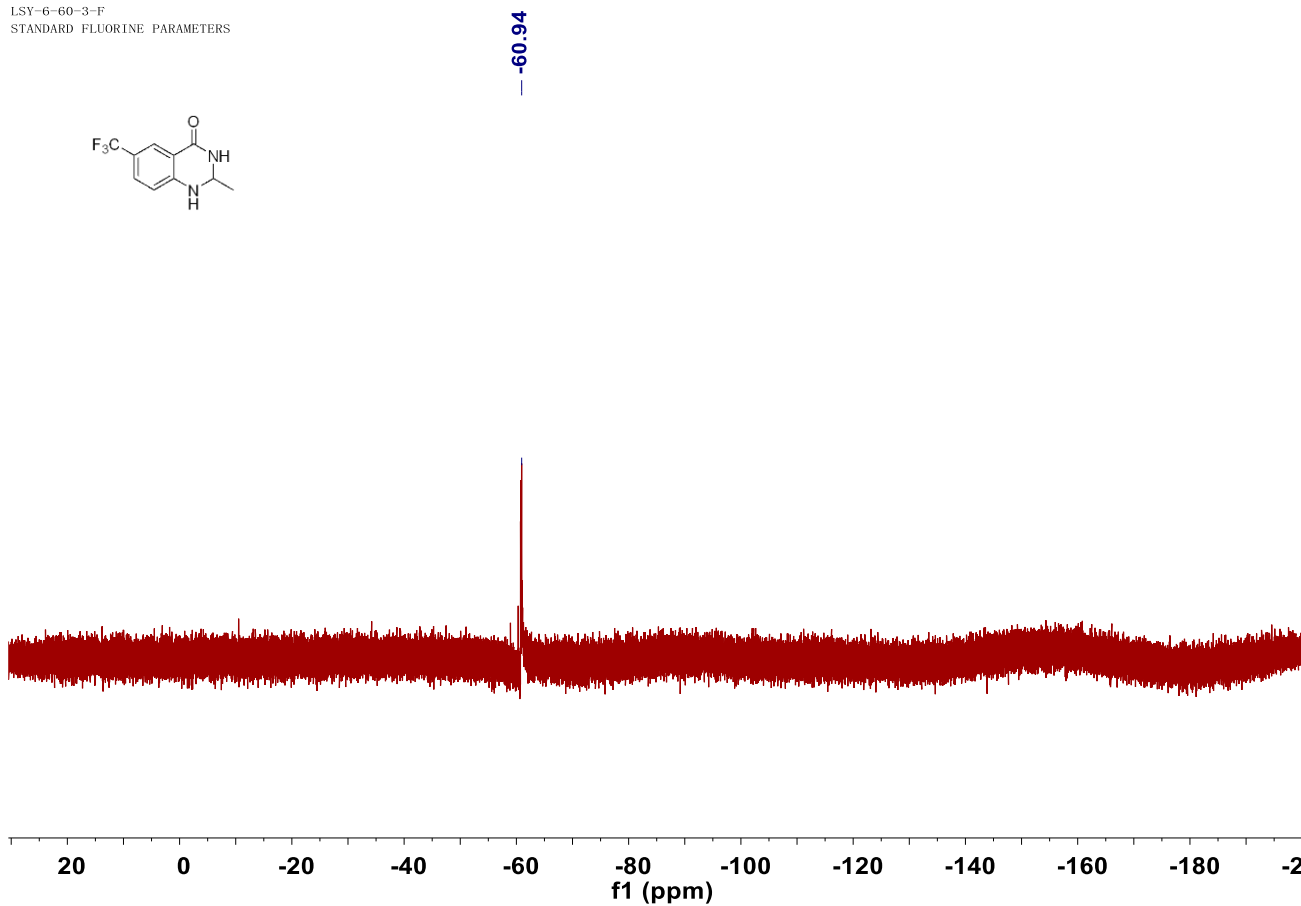

**$^1\text{H}$  NMR (500 MHz,  $\text{DMSO}-d_6$ ) of 7-methoxy-2-methyl-2,3-dihydroquinazolin-4(1H)-one (3ab)**

PROTON\_01

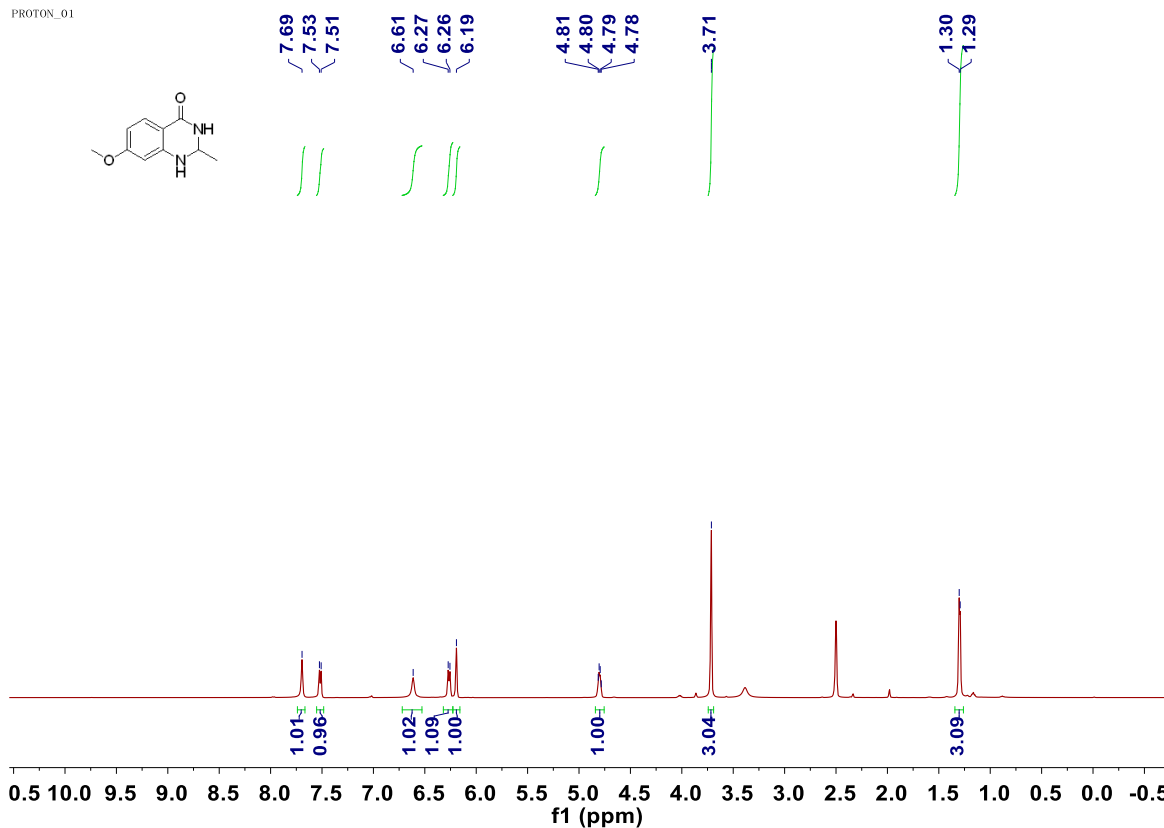

**$^{13}\text{C}\{^1\text{H}\}$  NMR (126 MHz,  $\text{DMSO}-d_6$ ) of 7-methoxy-2-methyl-2,3-dihydroquinazolin-4(1H)-one (3ab)**

CARBON\_01

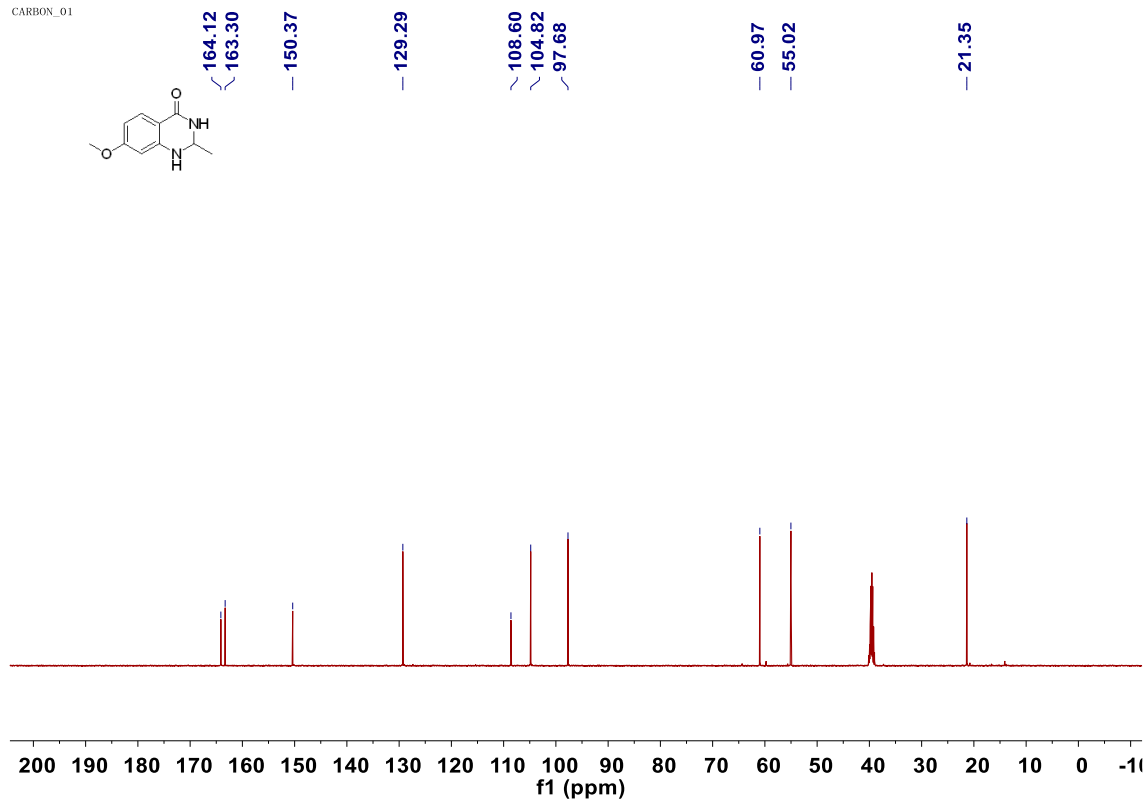



**$^1\text{H}$  NMR (500 MHz,  $\text{DMSO}-d_6$ ) of 7-fluoro-2-methyl-2,3-dihydroquinazolin-4(1H)-one (3ac)**

PROTON\_01

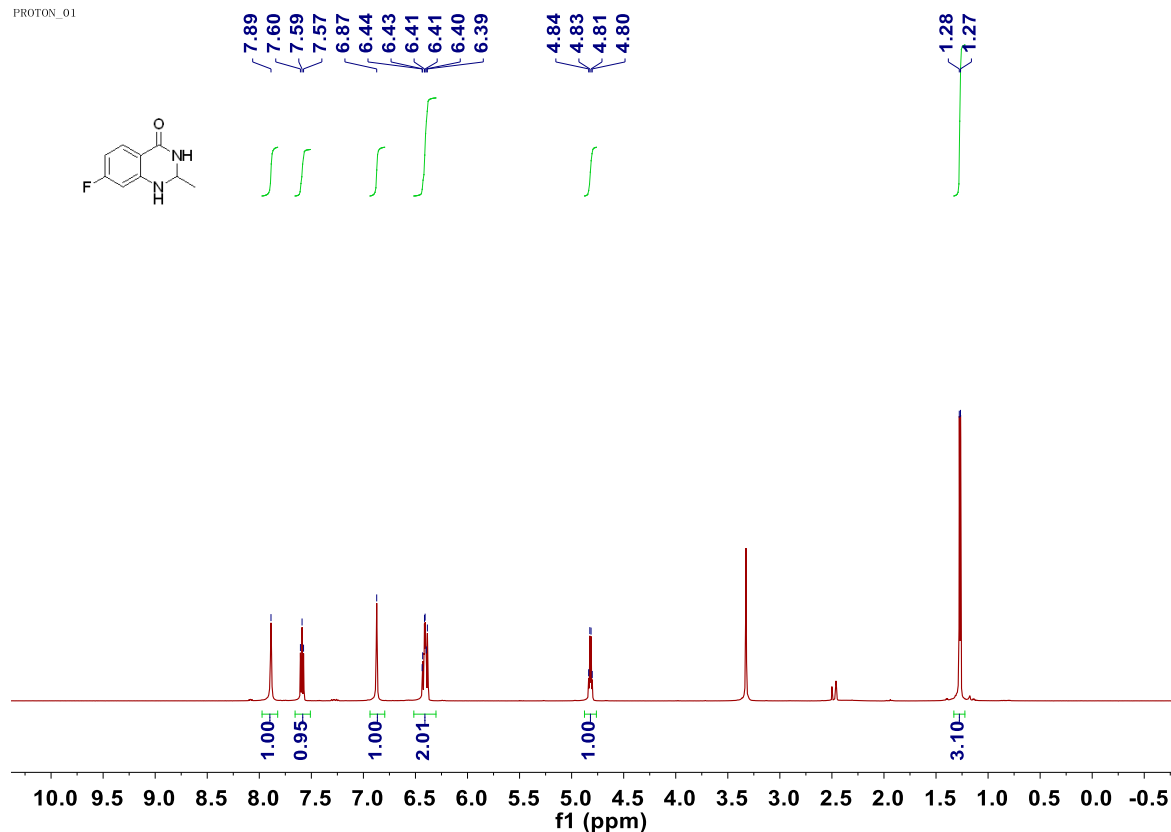

**$^{13}\text{C}\{^1\text{H}\}$  NMR (126 MHz,  $\text{DMSO}-d_6$ ) of 7-fluoro-2-methyl-2,3-dihydroquinazolin-4(1H)-one (3ac)**

CARBON\_01

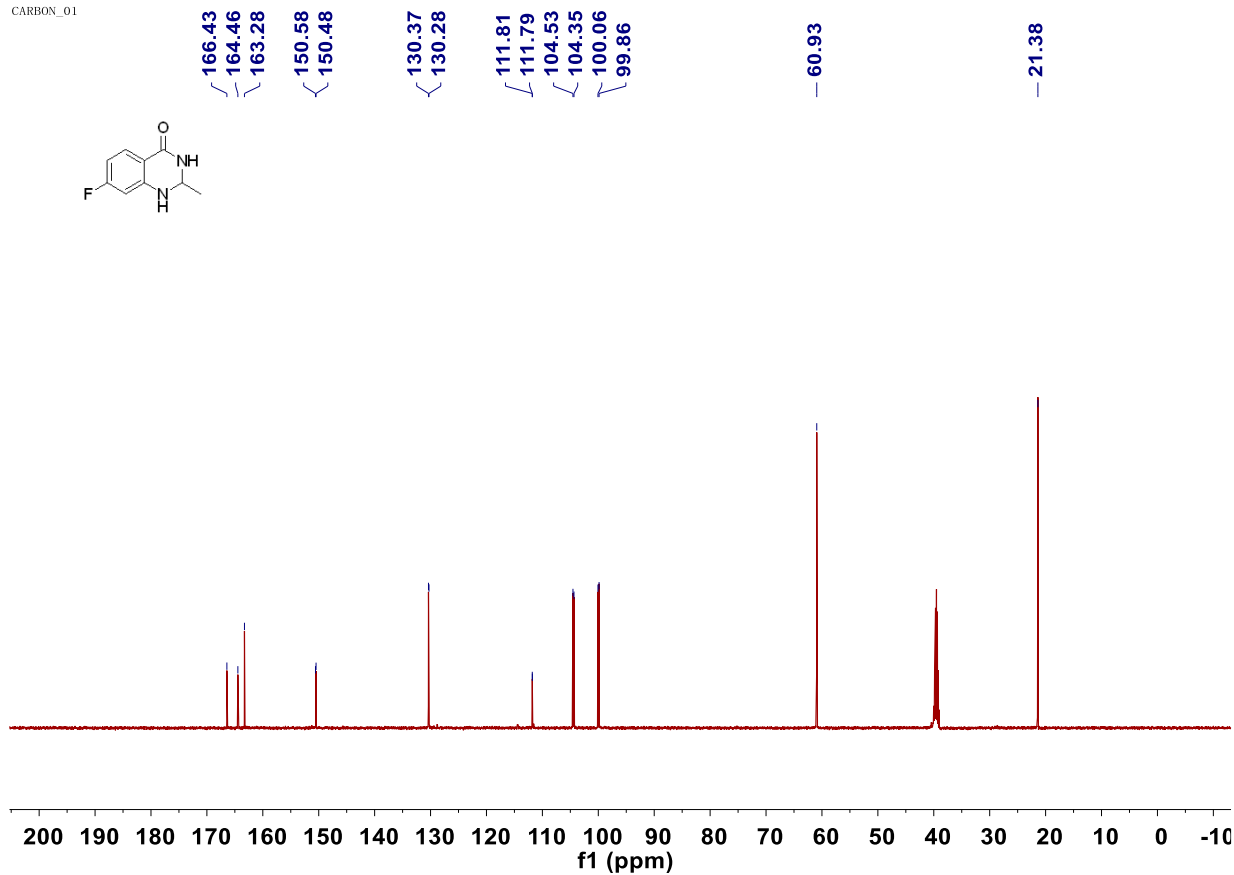

**$^{19}\text{F}$  NMR (470 MHz,  $\text{DMSO-}d_6$ ) of 7-fluoro-2-methyl-2,3-dihydroquinazolin-4(1H)-one (3ac)**

lsy-3ac-F-  
STANDARD FLUORINE PARAMETERS

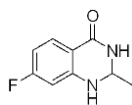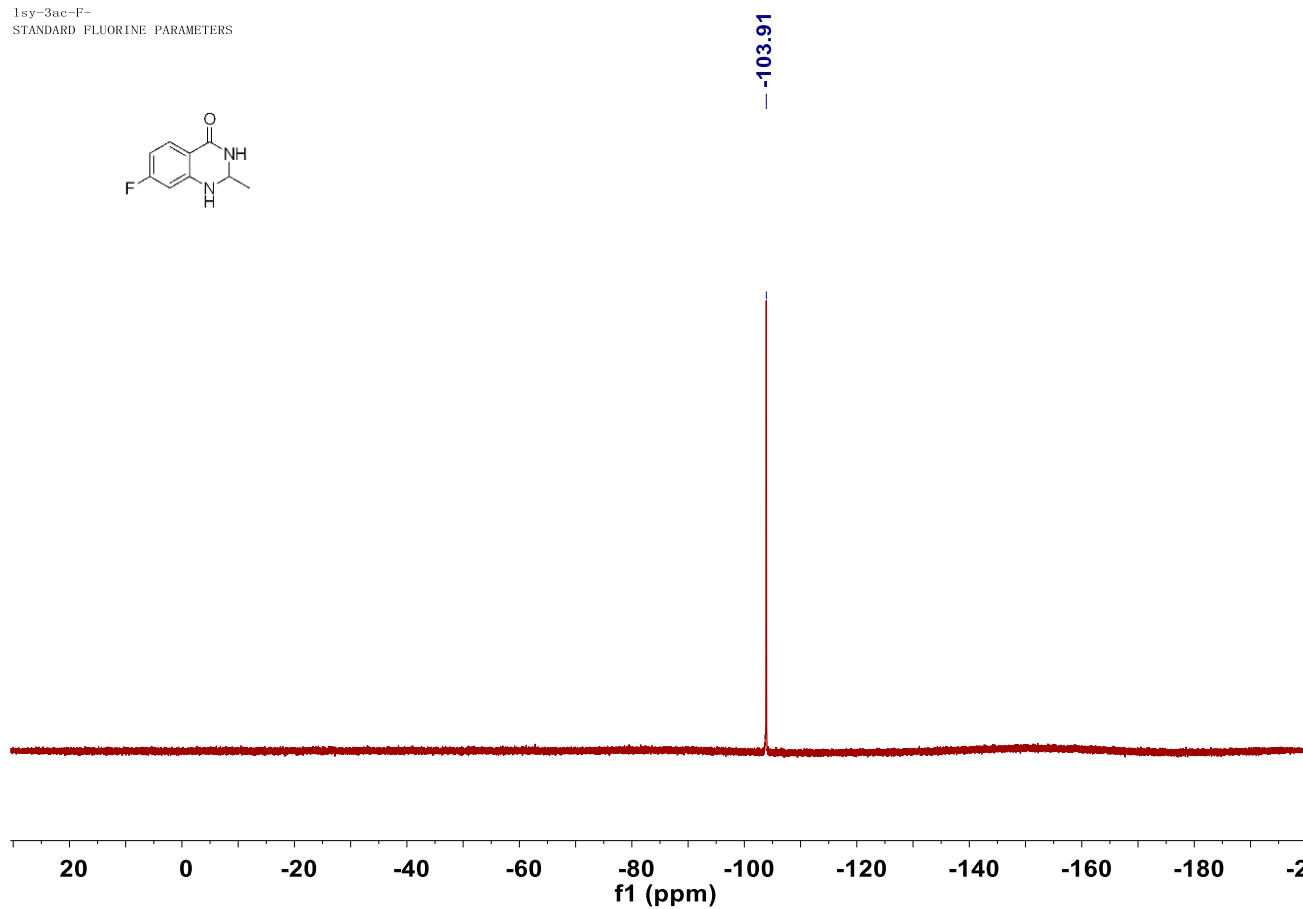

**$^1\text{H}$  NMR (500 MHz, DMSO- $d_6$ ) of 7-bromo-2-methyl-2,3-dihydroquinazolin-4(1H)-one (3ad)**

PROTON\_01

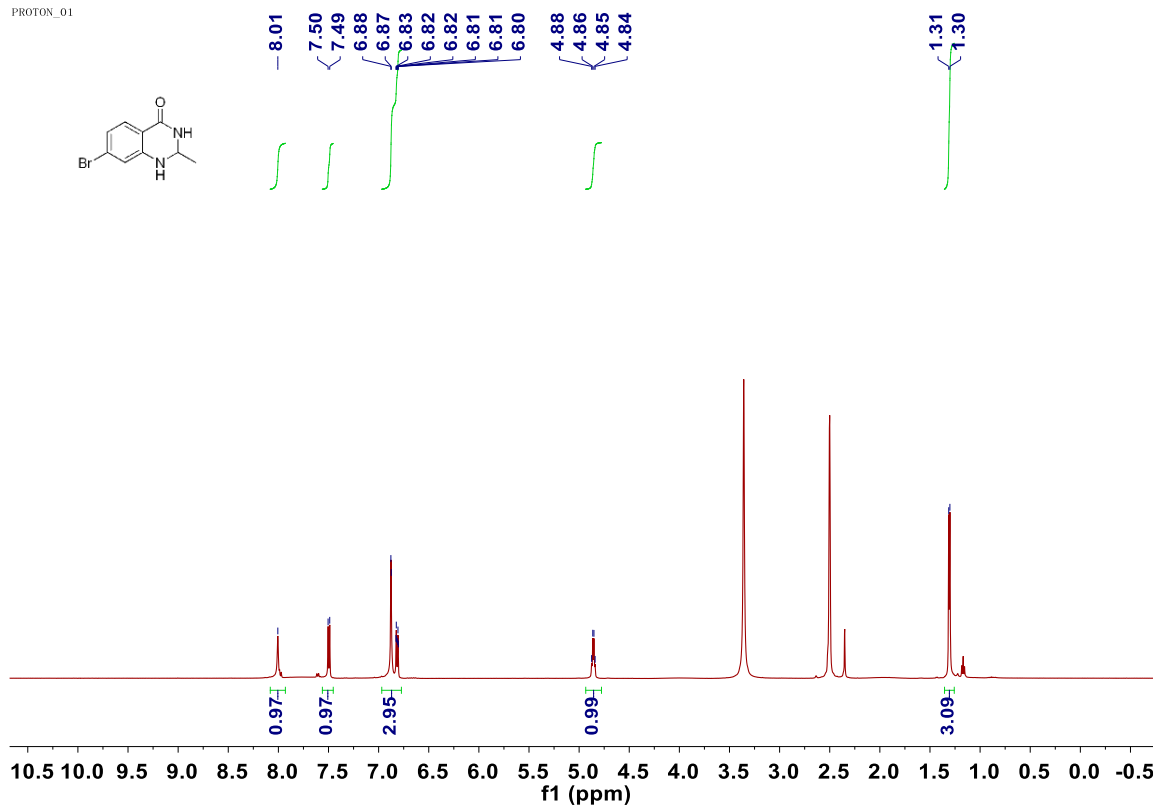

**$^{13}\text{C}\{^1\text{H}\}$  NMR (126 MHz, DMSO- $d_6$ ) of 7-bromo-2-methyl-2,3-dihydroquinazolin-4(1H)-one (3ad)**

CARBON\_01

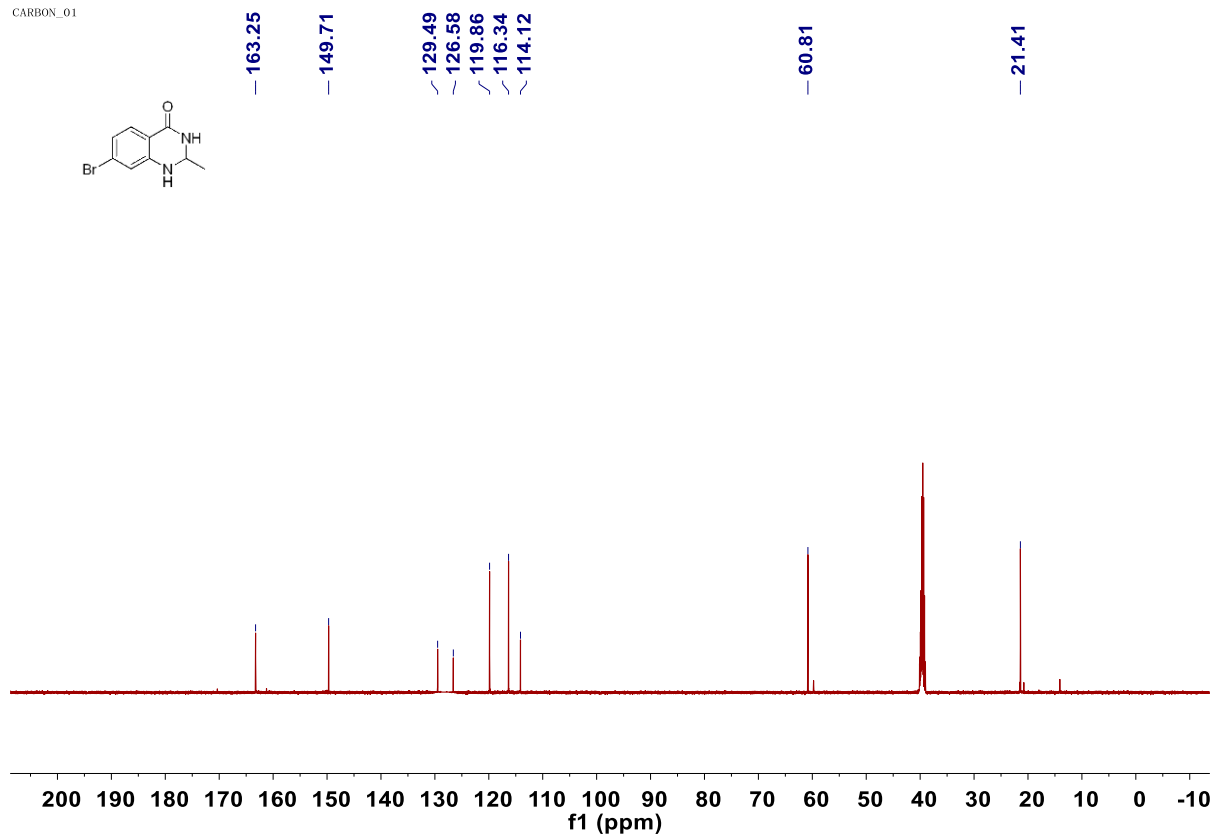

**$^1\text{H}$  NMR (500 MHz,  $\text{DMSO}-d_6$ ) of 8-amino-2-methyl-2,3-dihydroquinazolin-4(1H)-one (3ae)**

PROTON\_01

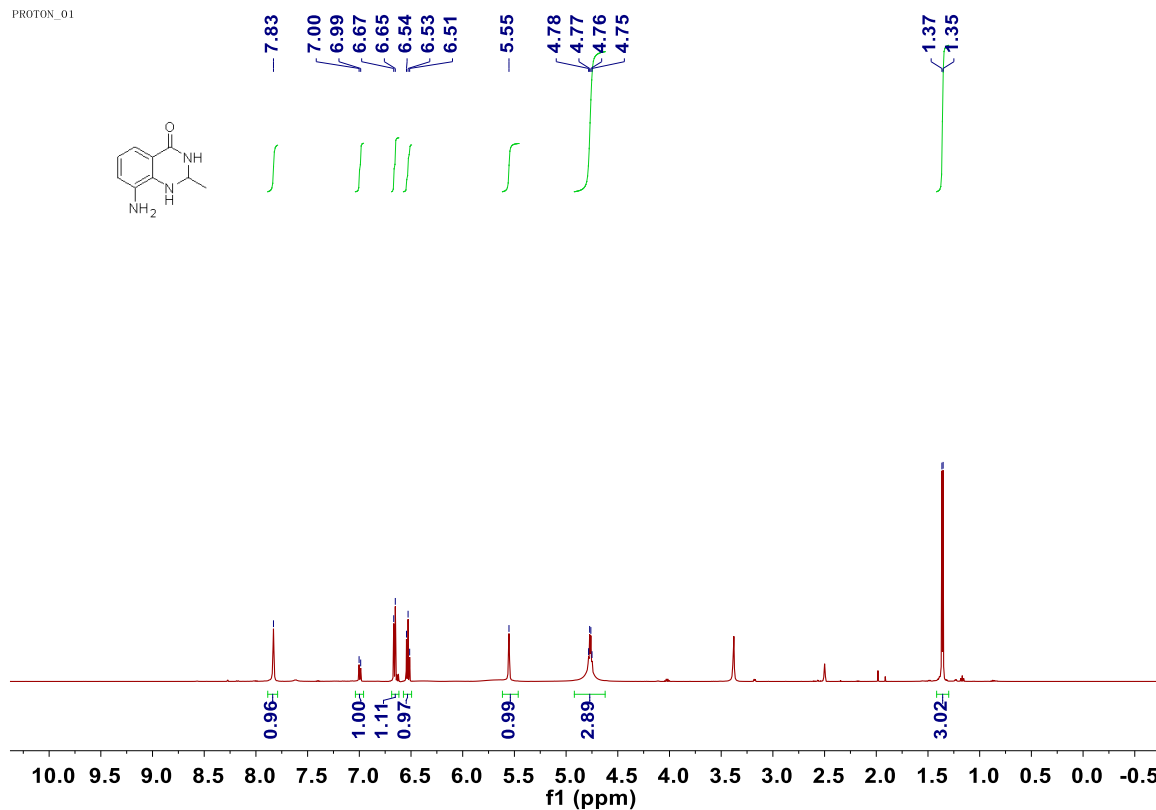

**$^{13}\text{C}\{^1\text{H}\}$  NMR (126 MHz,  $\text{DMSO}-d_6$ ) of 8-amino-2-methyl-2,3-dihydroquinazolin-4(1H)-one (3ae)**

CARBON\_01

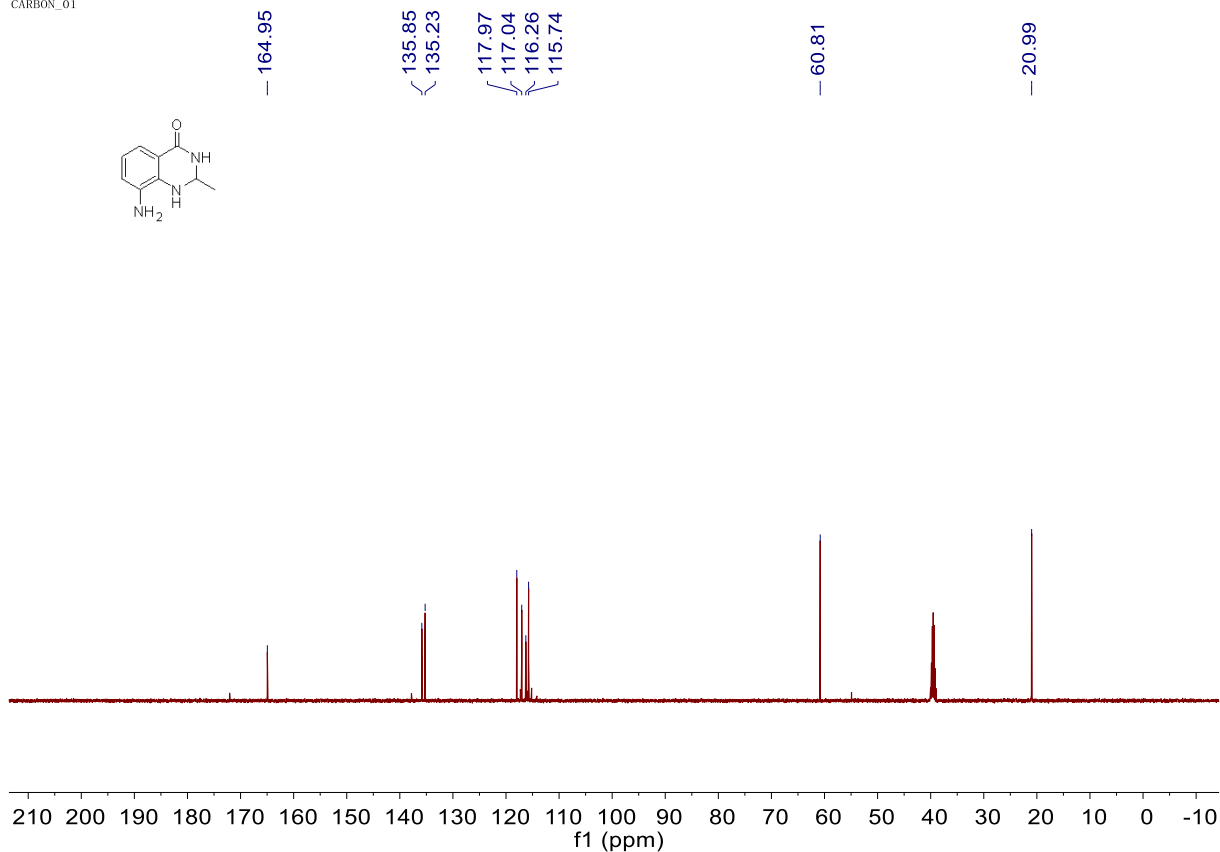

**$^1\text{H}$  NMR (500 MHz,  $\text{DMSO-}d_6$ ) of 6,7-dimethoxy-2-methyl-2,3-dihydroquinazolin-4(1H)-one (3af)**

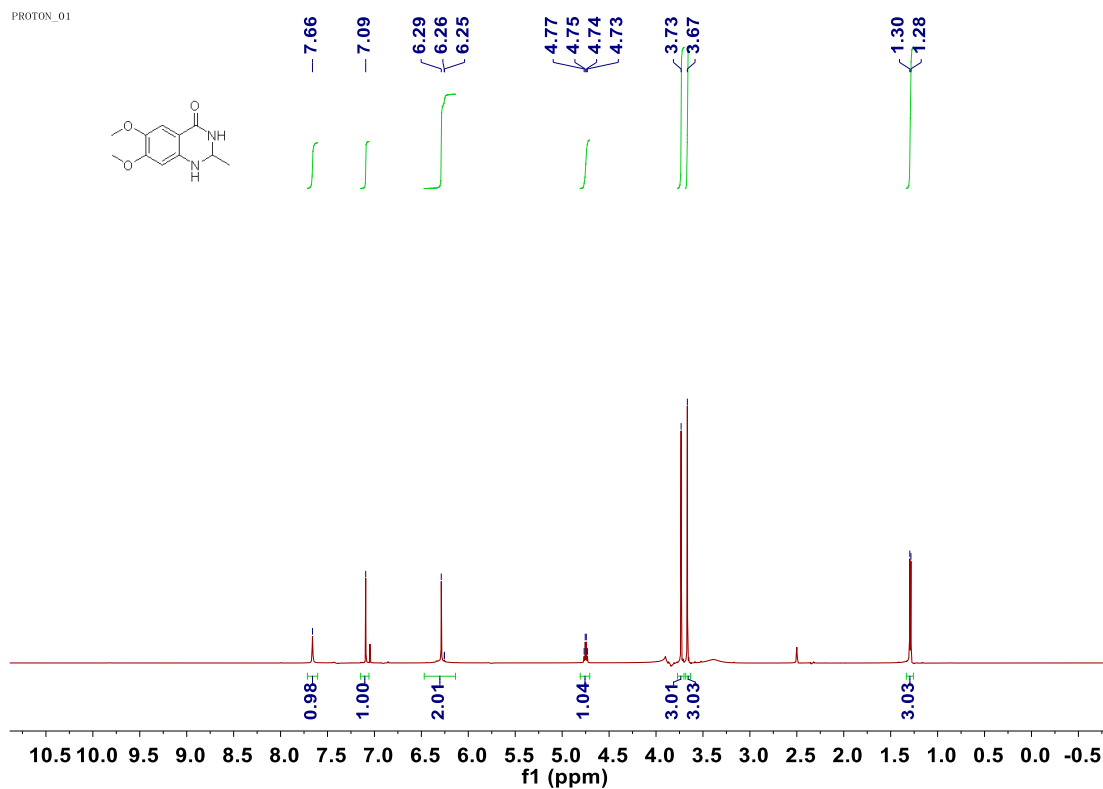

**$^{13}\text{C}\{^1\text{H}\}$  NMR (126 MHz,  $\text{DMSO-}d_6$ ) of 6,7-dimethoxy-2-methyl-2,3-dihydroquinazolin-4(1H)-one (3af)**

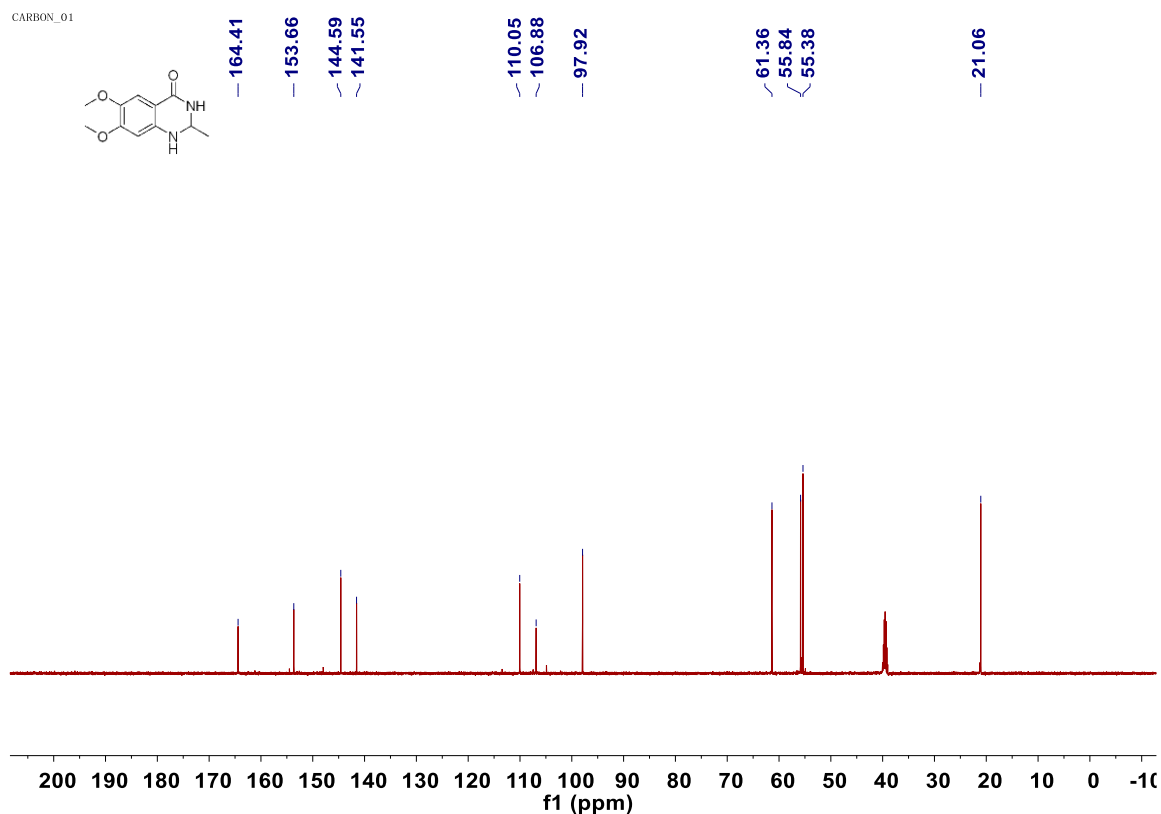

**$^1\text{H}$  NMR (500 MHz,  $\text{DMSO}-d_6$ ) of 6,7-dichloro-2-methyl-2,3-dihydroquinazolin-4(1H)-one (3ag)**

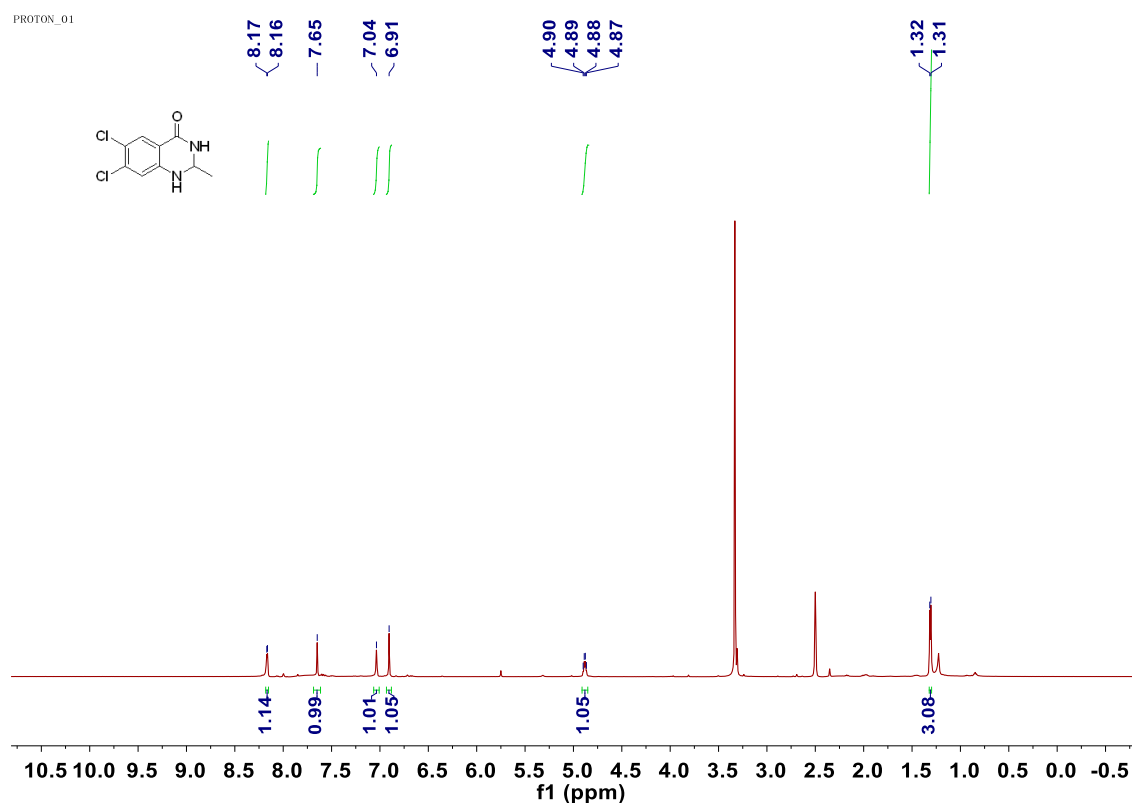

**$^{13}\text{C}\{^1\text{H}\}$  NMR (126 MHz,  $\text{DMSO}-d_6$ ) of 6,7-dichloro-2-methyl-2,3-dihydroquinazolin-4(1H)-one (3ag)**

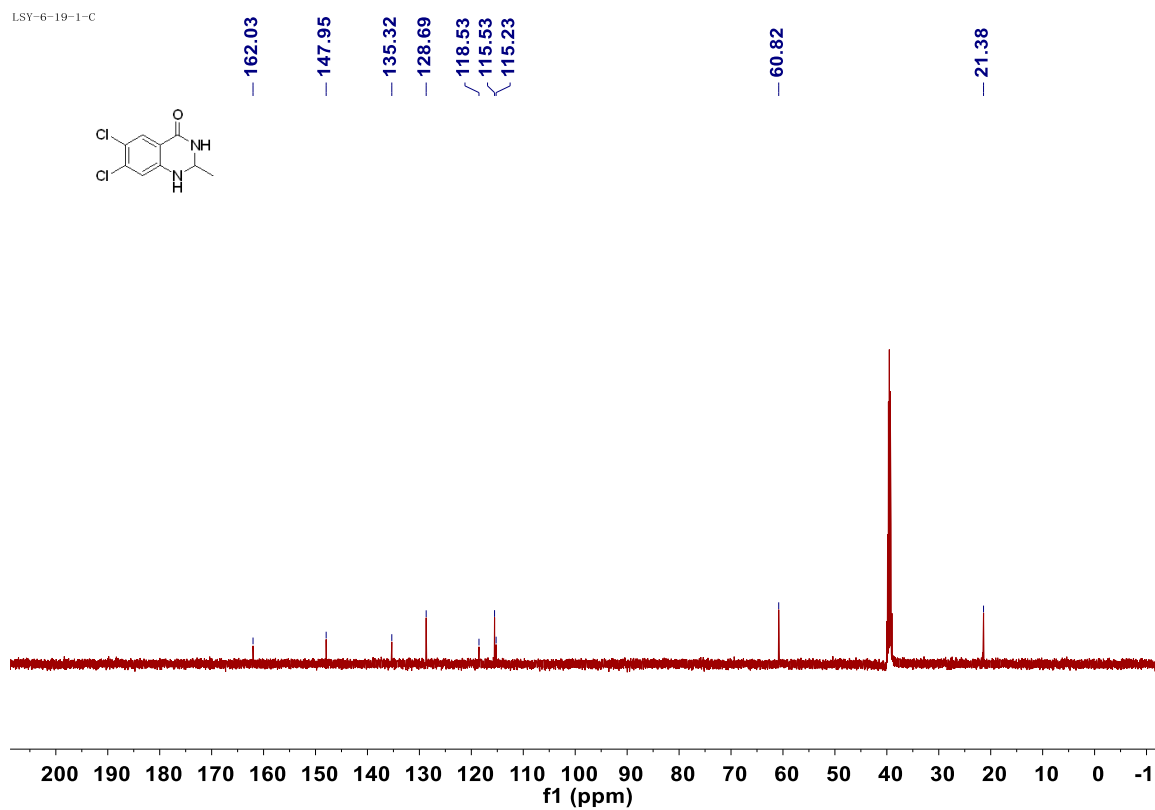

**$^1\text{H}$  NMR (500 MHz, DMSO- $d_6$ ) of 6,8-dibromo-2-methyl-2,3-dihydroquinazolin-4(1H)-one (3ah)**

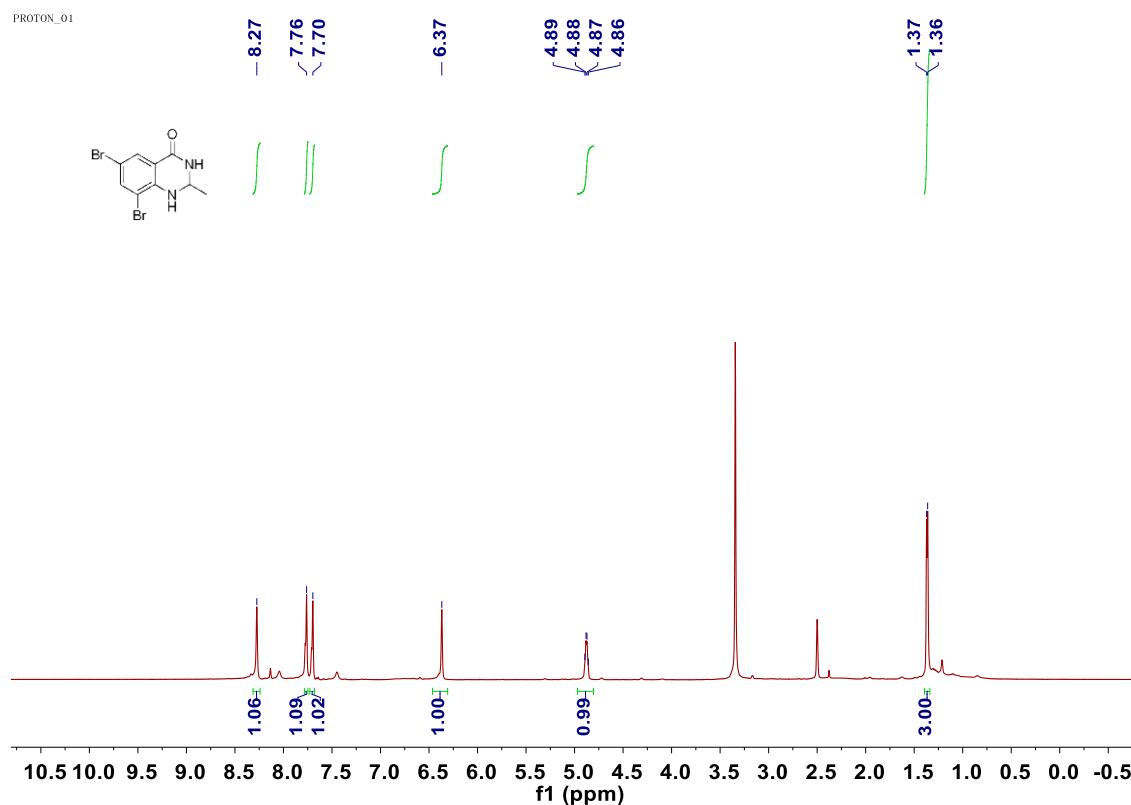

**$^{13}\text{C}\{^1\text{H}\}$  NMR (126 MHz, DMSO- $d_6$ ) of 6,8-dibromo-2-methyl-2,3-dihydroquinazolin-4(1H)-one (3ah)**

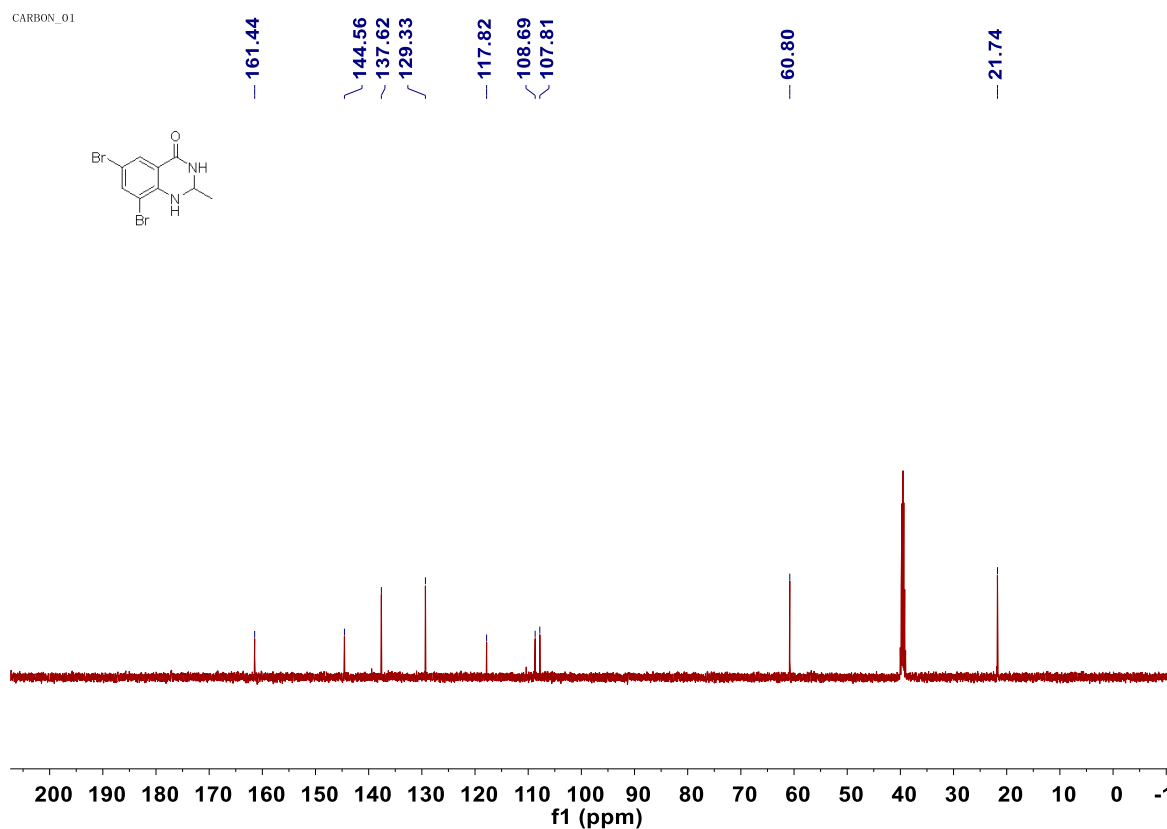

**$^1\text{H}$  NMR (500 MHz,  $\text{DMSO}-d_6$ ) of 2-methyl-2,3-dihydropyrido[3,2-d]pyrimidin-4(1H)-one (3ai)**

PROTON\_01

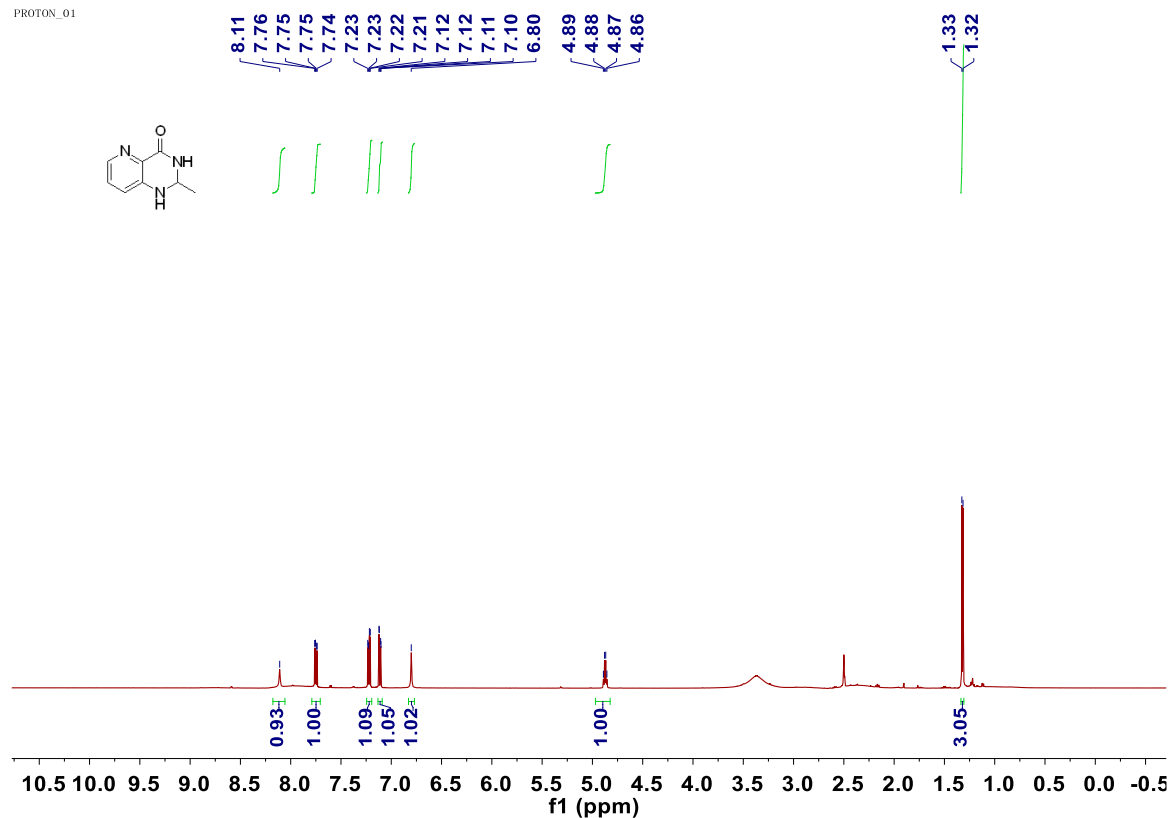

**$^{13}\text{C}\{^1\text{H}\}$  NMR (126 MHz,  $\text{DMSO}-d_6$ ) of 2-methyl-2,3-dihydropyrido[3,2-d]pyrimidin-4(1H)-one (3ai)**

CARBON\_01

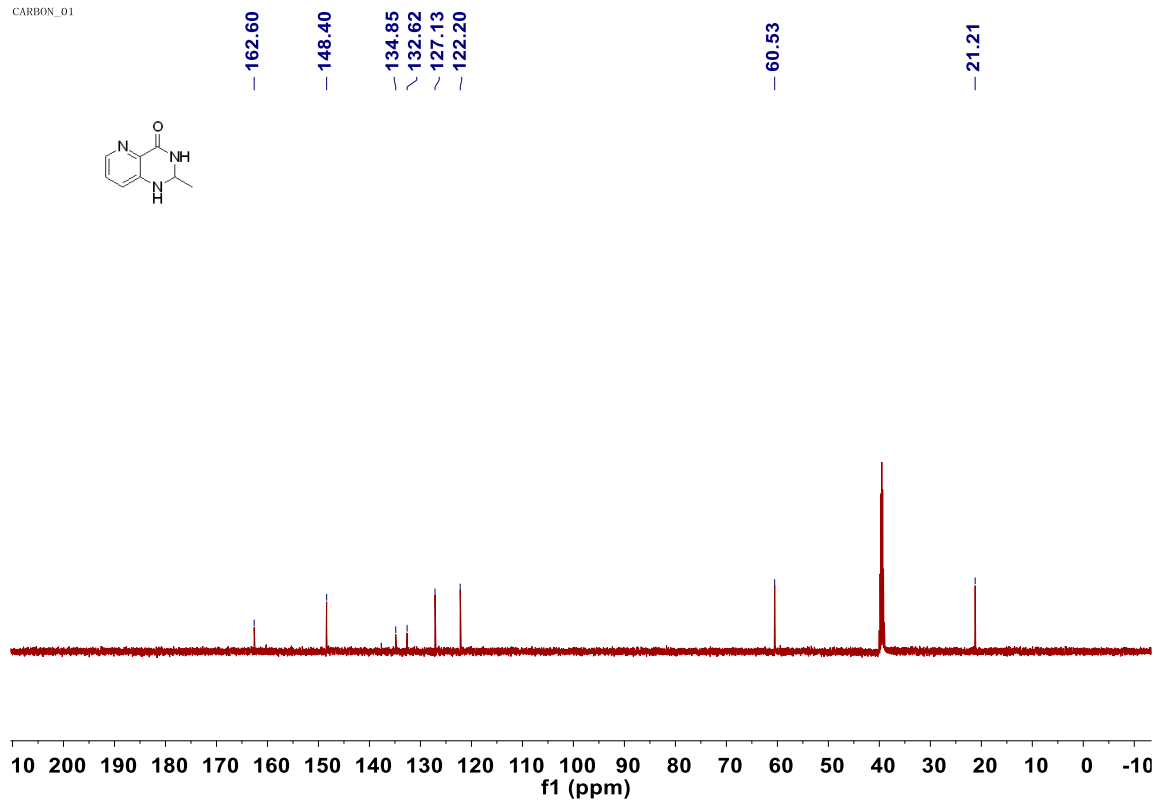



**$^1\text{H}$  NMR (500 MHz,  $\text{DMSO}-d_6$ ) of 2-methyl-2,3-dihydrobenzo[h]quinazolin-4(1H)-one (3ak)**

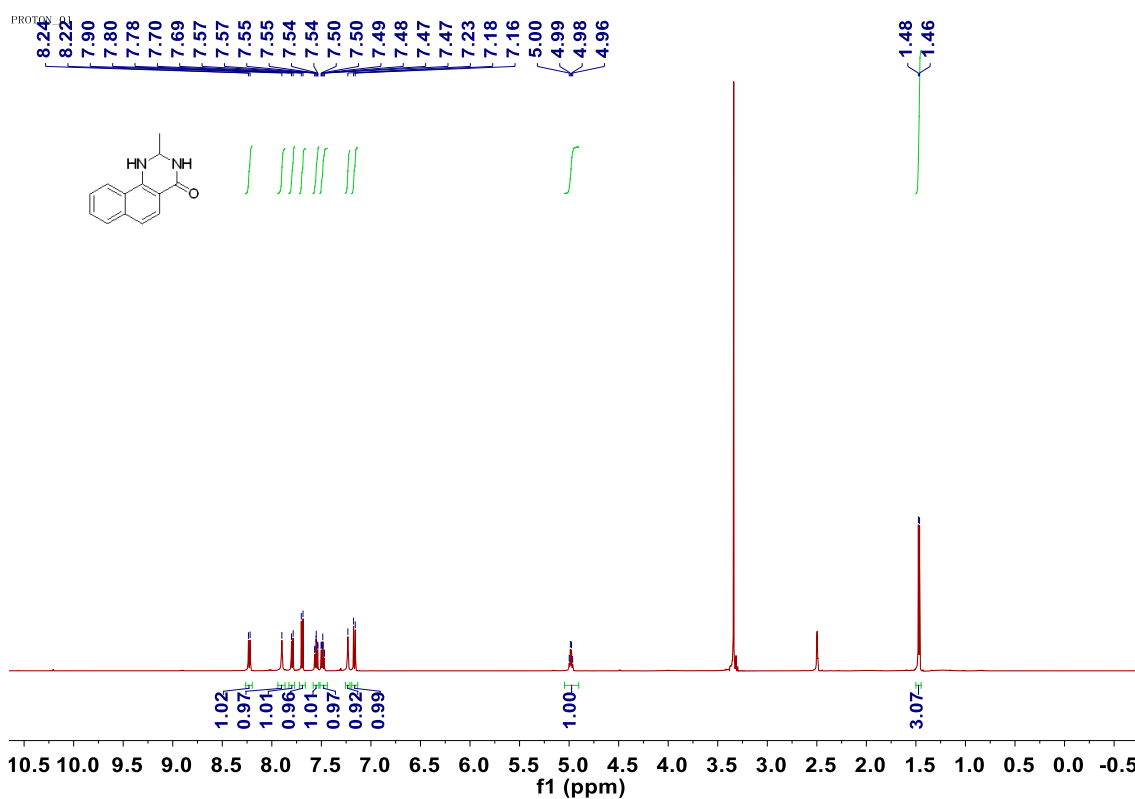

**$^{13}\text{C}\{^1\text{H}\}$  NMR (126 MHz,  $\text{DMSO}-d_6$ ) of 2-methyl-2,3-dihydrobenzo[h]quinazolin-4(1H)-one (3ak)**

CARBON\_01

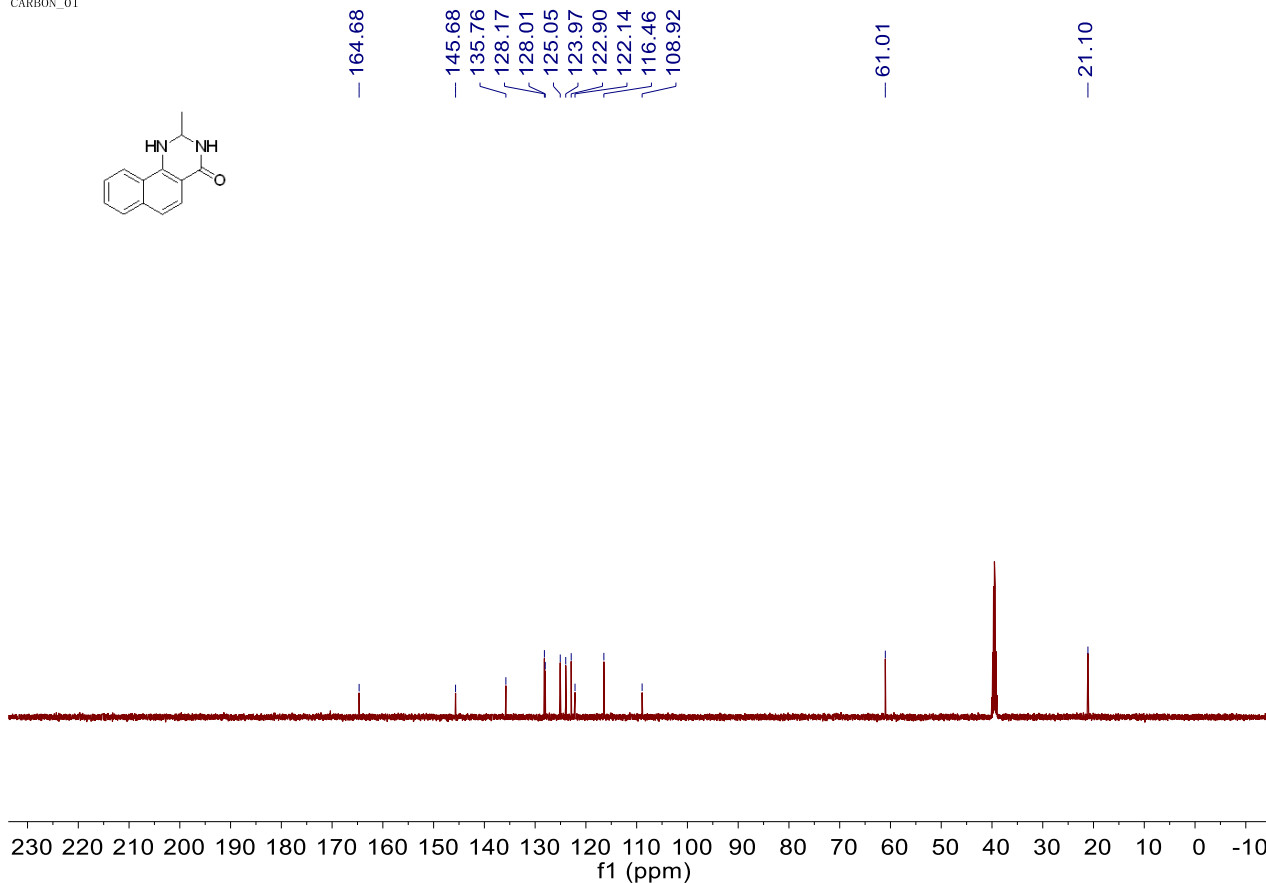

**<sup>1</sup>H NMR (500 MHz, DMSO-*d*<sub>6</sub>) of 2-methylquinazolin-4(3H)-one (4a)**

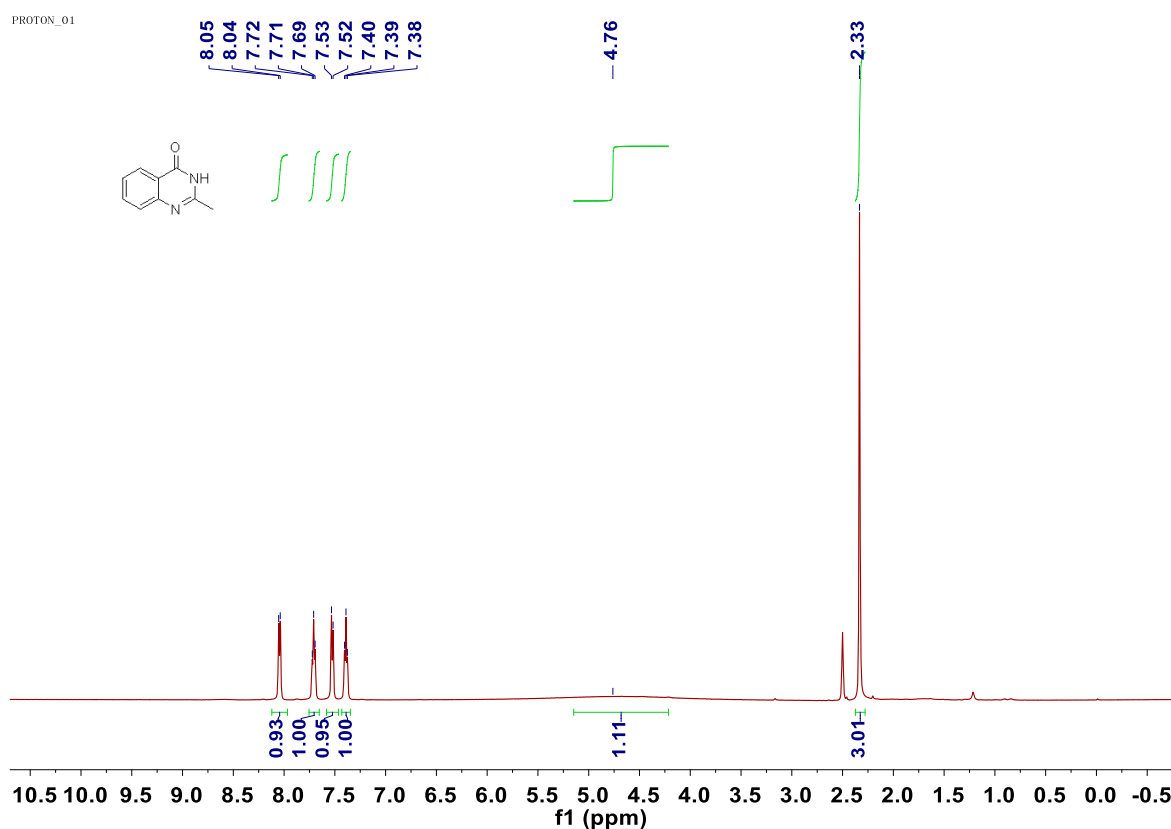

**<sup>13</sup>C{<sup>1</sup>H} NMR (126 MHz, DMSO-*d*<sub>6</sub>) of 2-methylquinazolin-4(3H)-one (4a)**

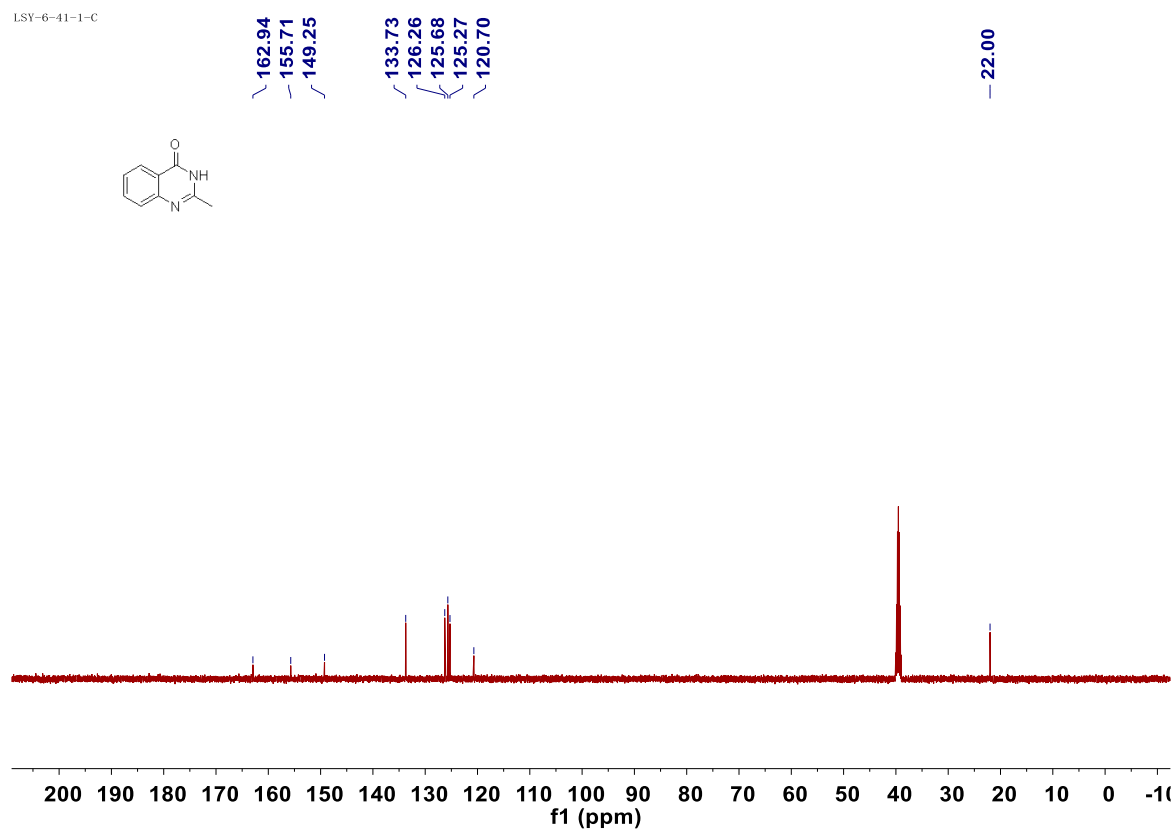

**<sup>1</sup>H NMR (500 MHz, Chloroform-*d*) of 2-methyl-3-(o-tolyl)quinazolin-4(3H)-one (4m)**

PROTON\_01

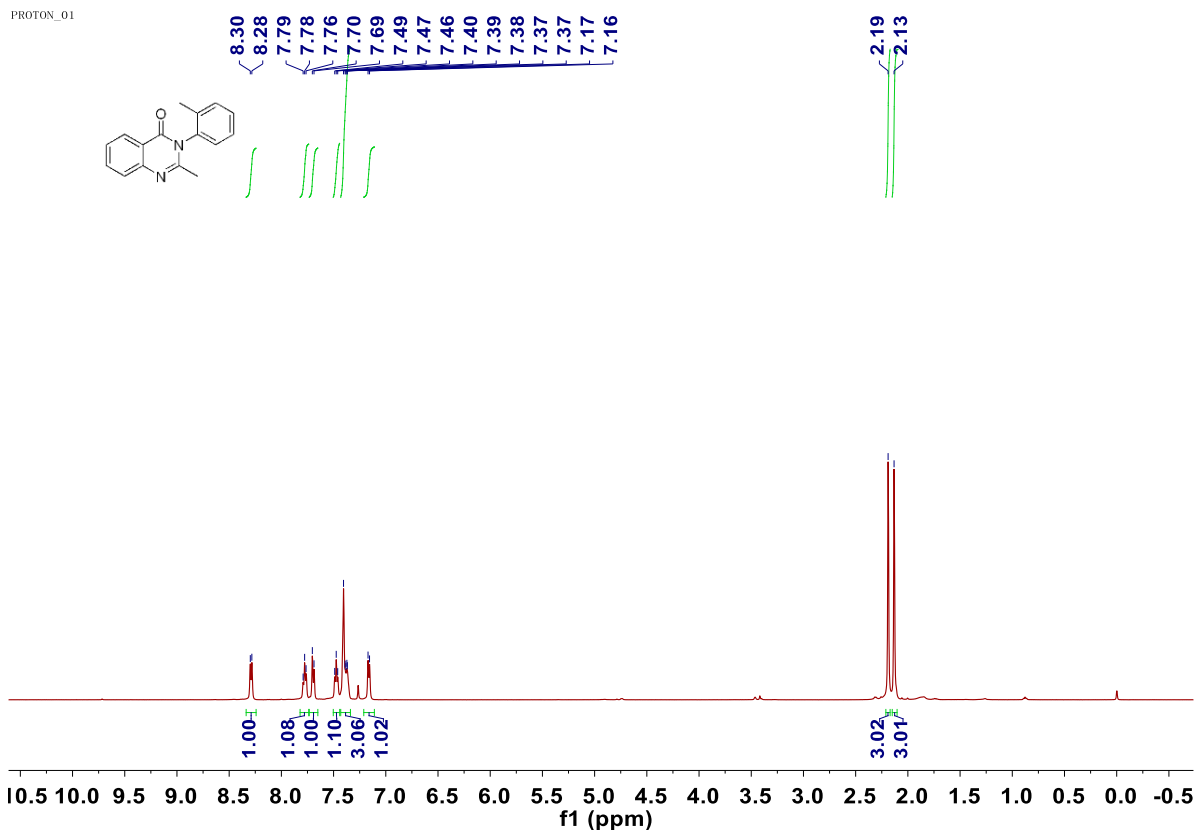

**<sup>13</sup>C{<sup>1</sup>H} NMR (126 MHz, Chloroform-*d*) of 2-methyl-3-(o-tolyl)quinazolin-4(3H)-one (4m)**

CARBON\_01

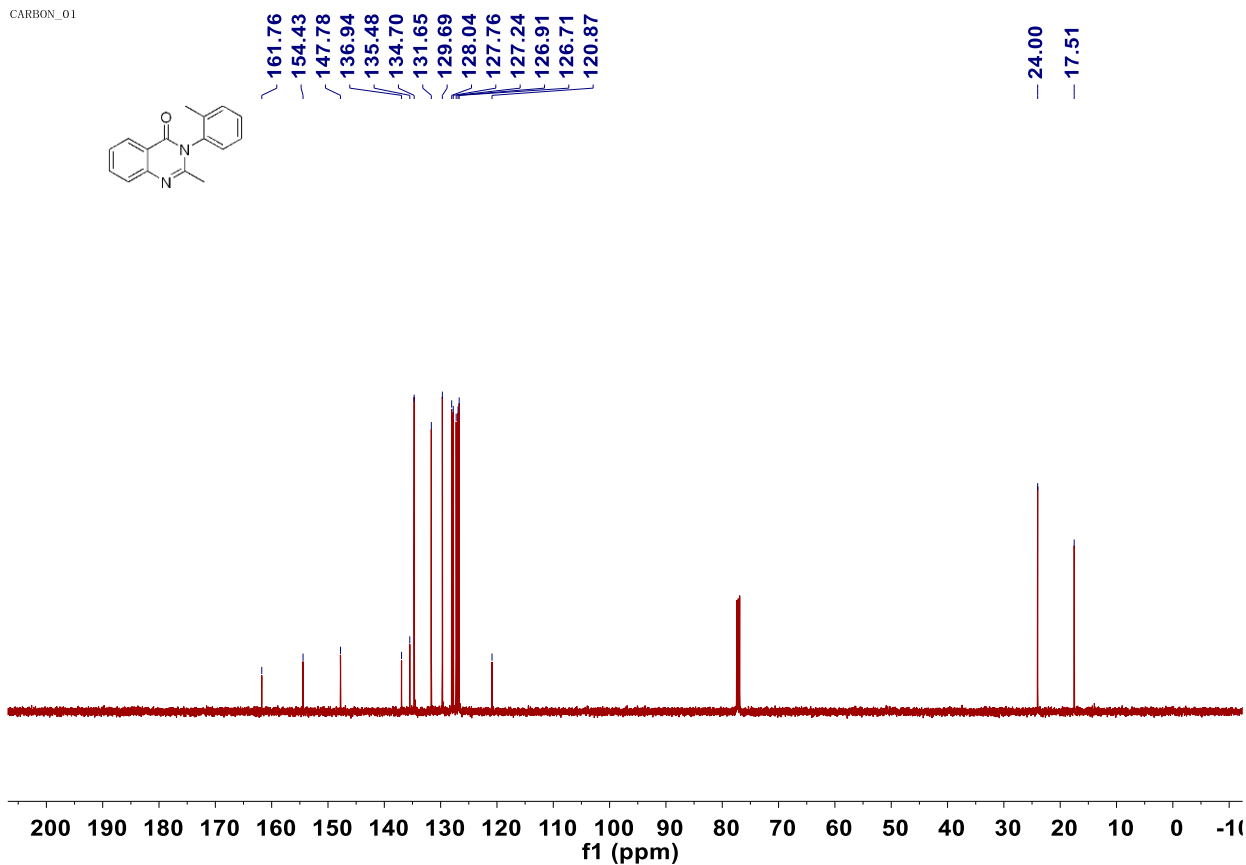

**$^1\text{H}$  NMR (500 MHz,  $\text{DMSO-}d_6$ ) of 2-methylthieno[2,3-d]pyrimidin-4(3H)-one (4q)**

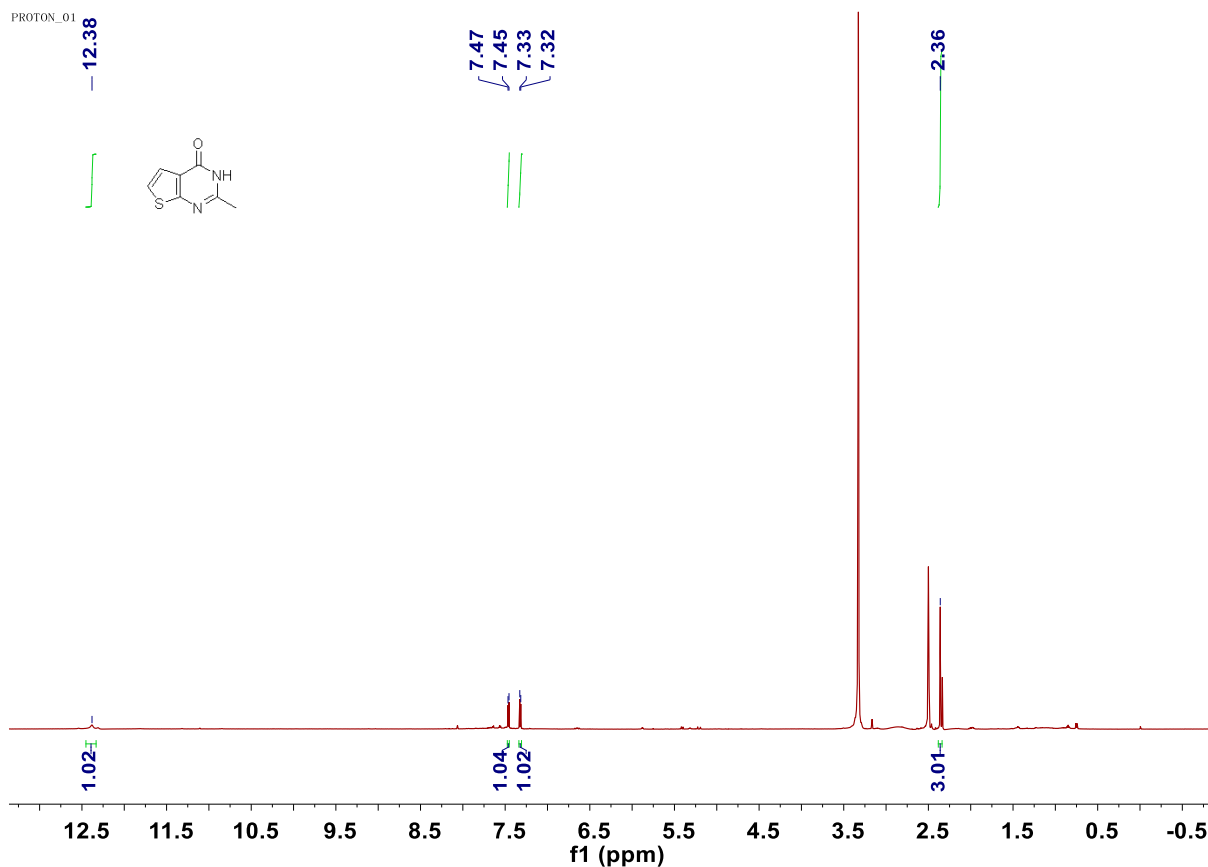

**$^{13}\text{C}\{^1\text{H}\}$  NMR (126 MHz,  $\text{DMSO-}d_6$ ) of 2-methylthieno[2,3-d]pyrimidin-4(3H)-one (4q)**

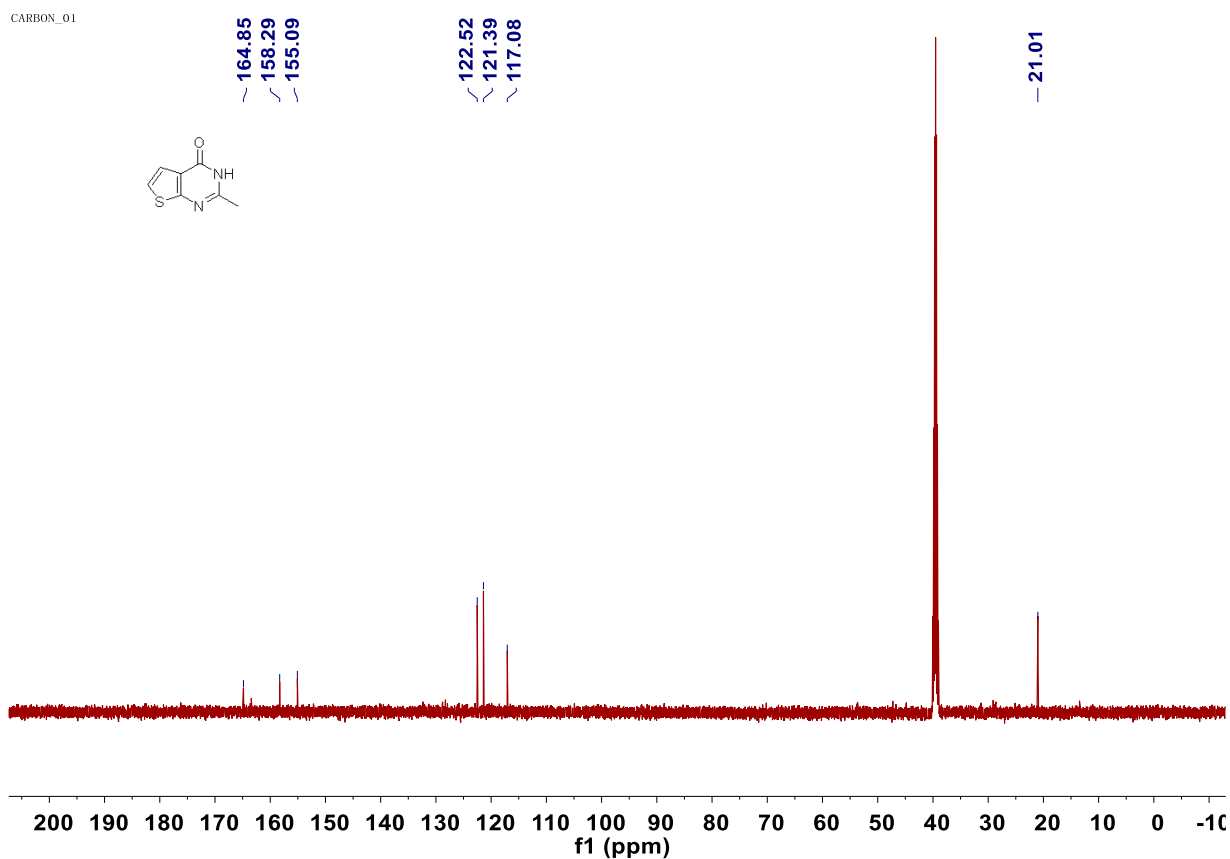

**$^1\text{H}$  NMR (500 MHz,  $\text{DMSO}-d_6$ ) of 3-methyl-4H-benzo[e][1,2,4]thiadiazine 1,1-dioxide (4r)**

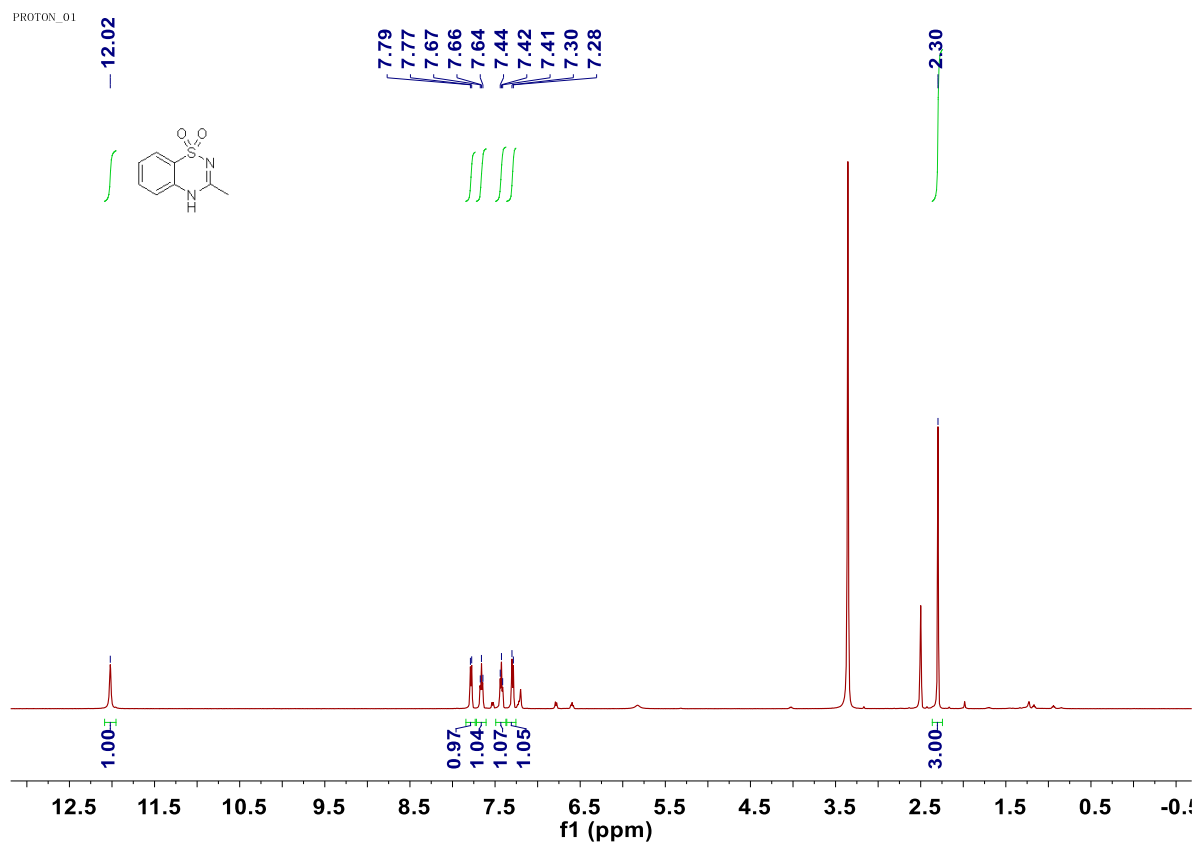

**$^{13}\text{C}\{^1\text{H}\}$  NMR (126 MHz,  $\text{DMSO}-d_6$ ) of 3-methyl-4H-benzo[e][1,2,4]thiadiazine 1,1-dioxide (4r)**

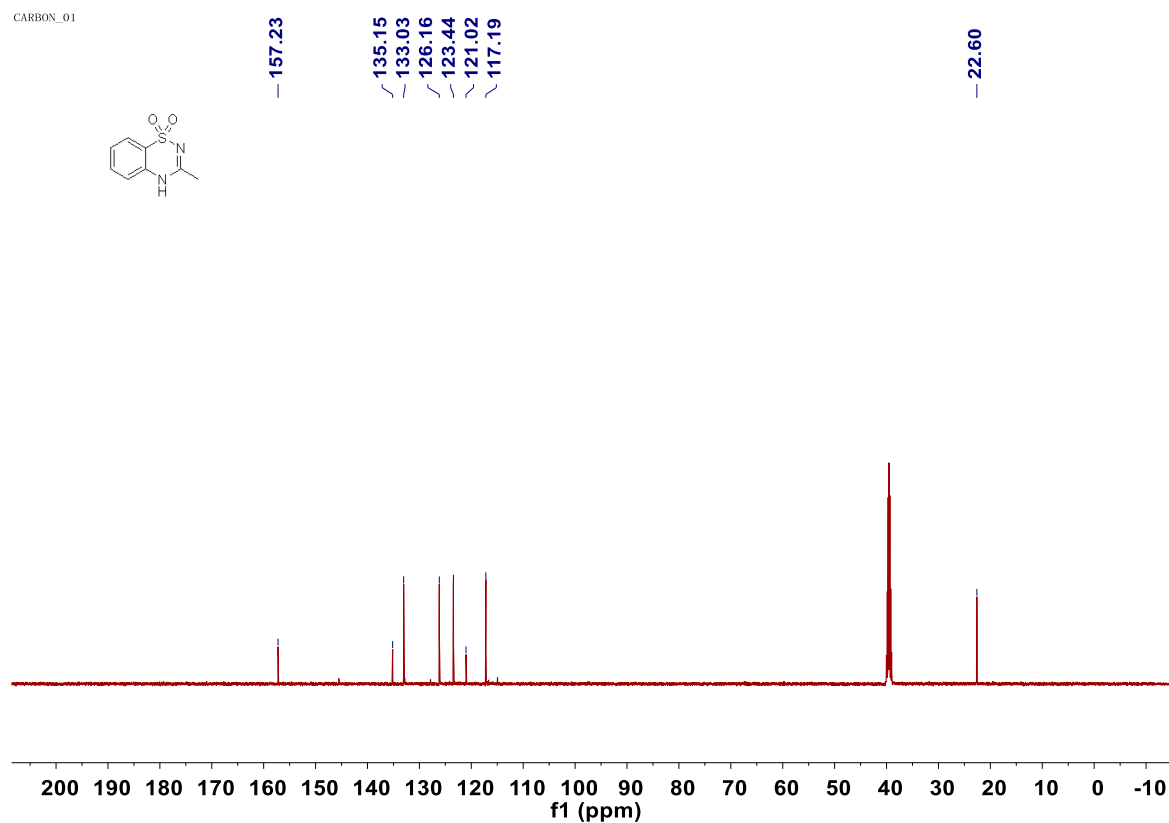

**$^1\text{H}$  NMR (500 MHz,  $\text{DMSO}-d_6$ ) of 6-amino-2-methylquinazolin-4(3H)-one (4y')**

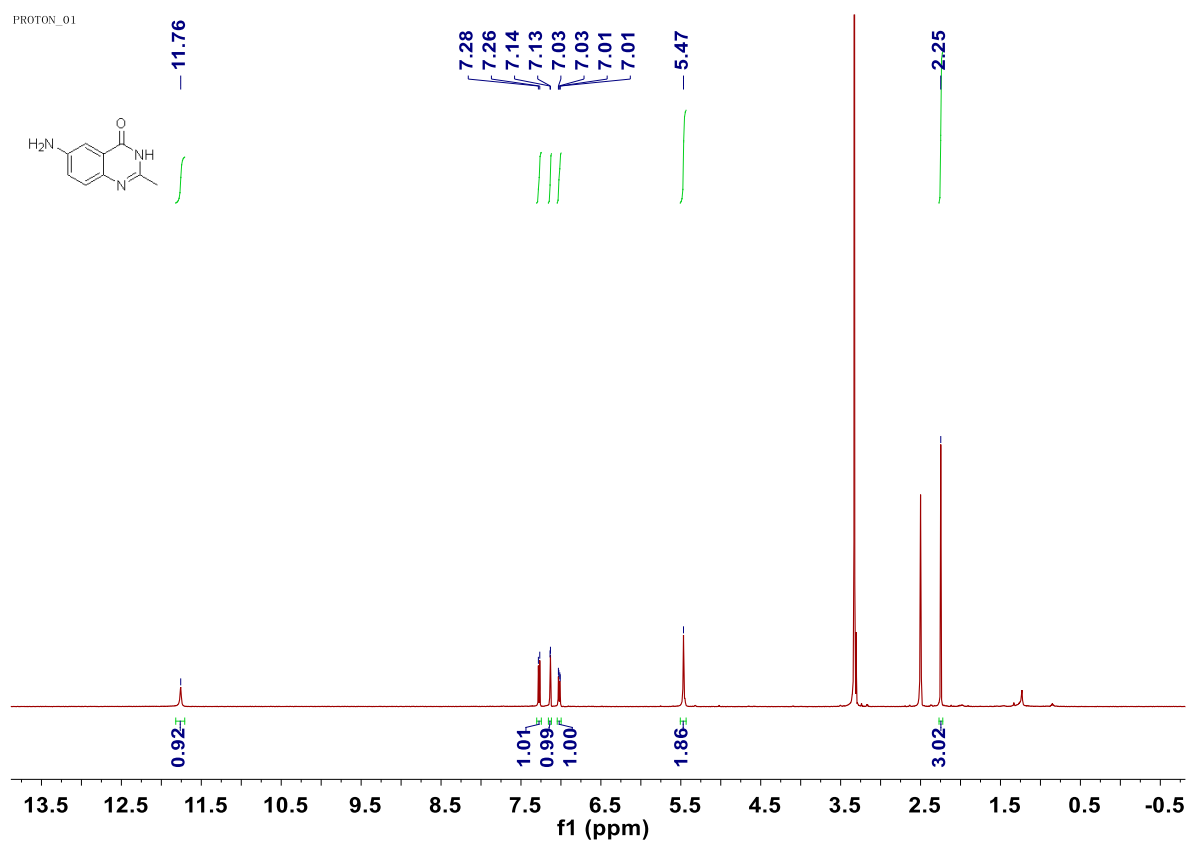

**$^{13}\text{C}\{^1\text{H}\}$  NMR (126 MHz,  $\text{DMSO}-d_6$ ) of 6-amino-2-methylquinazolin-4(3H)-one (4y')**

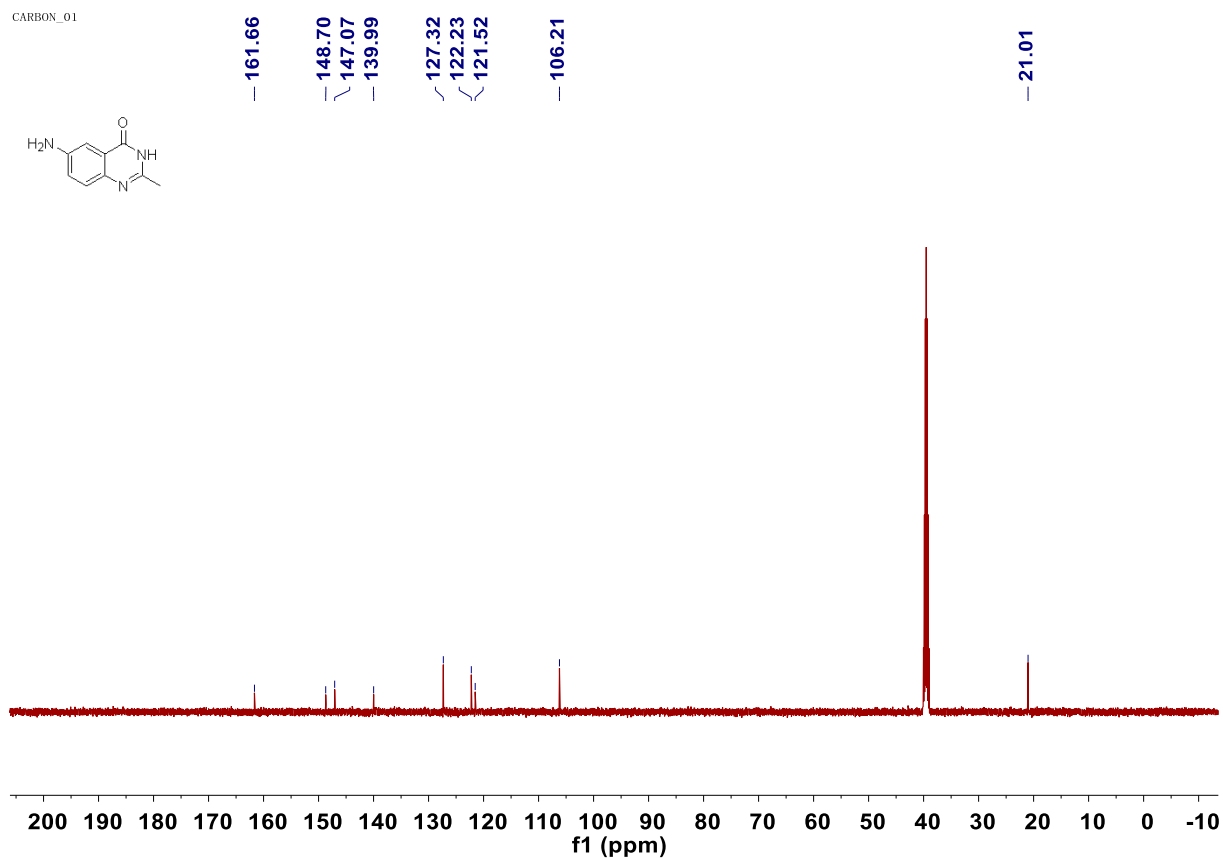

**$^1\text{H}$  NMR (500 MHz,  $\text{DMSO}-d_6$ ) of 2,6-dimethylthieno[2,3-d]pyrimidin-4(3H)-one (4aj)**

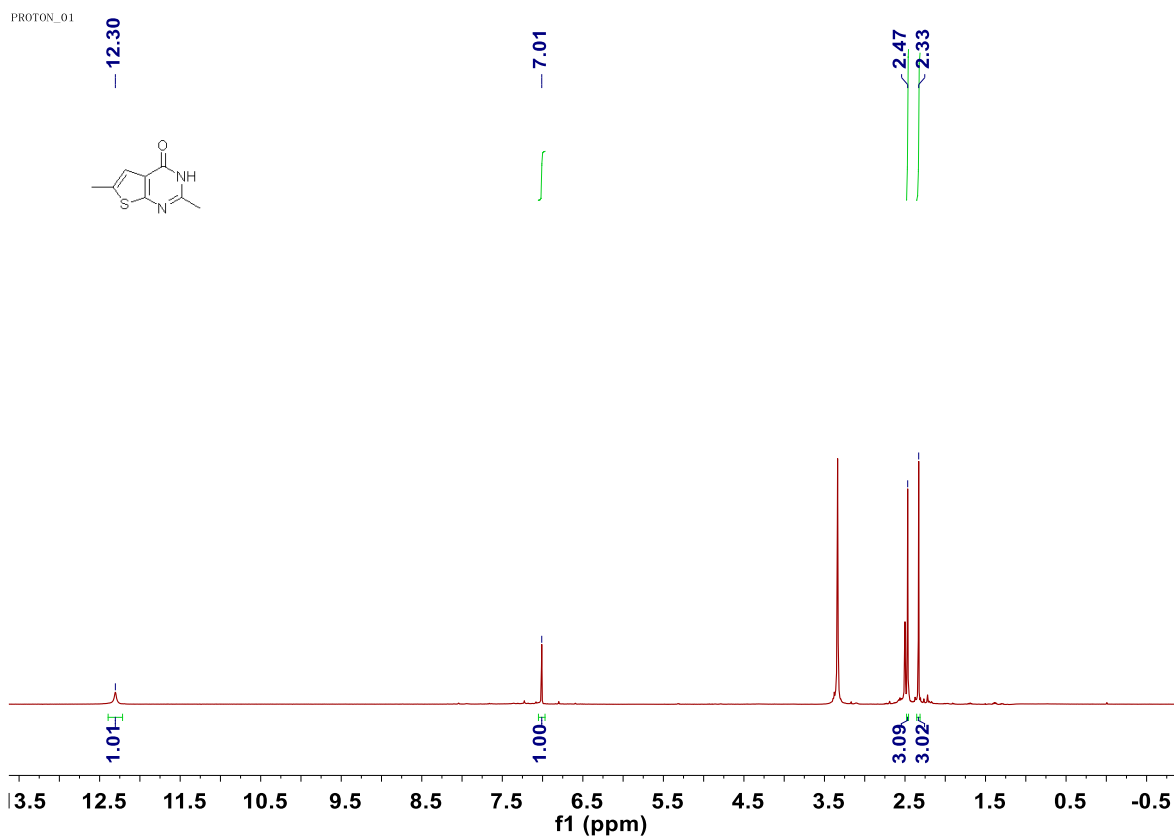

**$^{13}\text{C}\{^1\text{H}\}$  NMR (126 MHz,  $\text{DMSO}-d_6$ ) of 2,6-dimethylthieno[2,3-d]pyrimidin-4(3H)-one (4aj)**

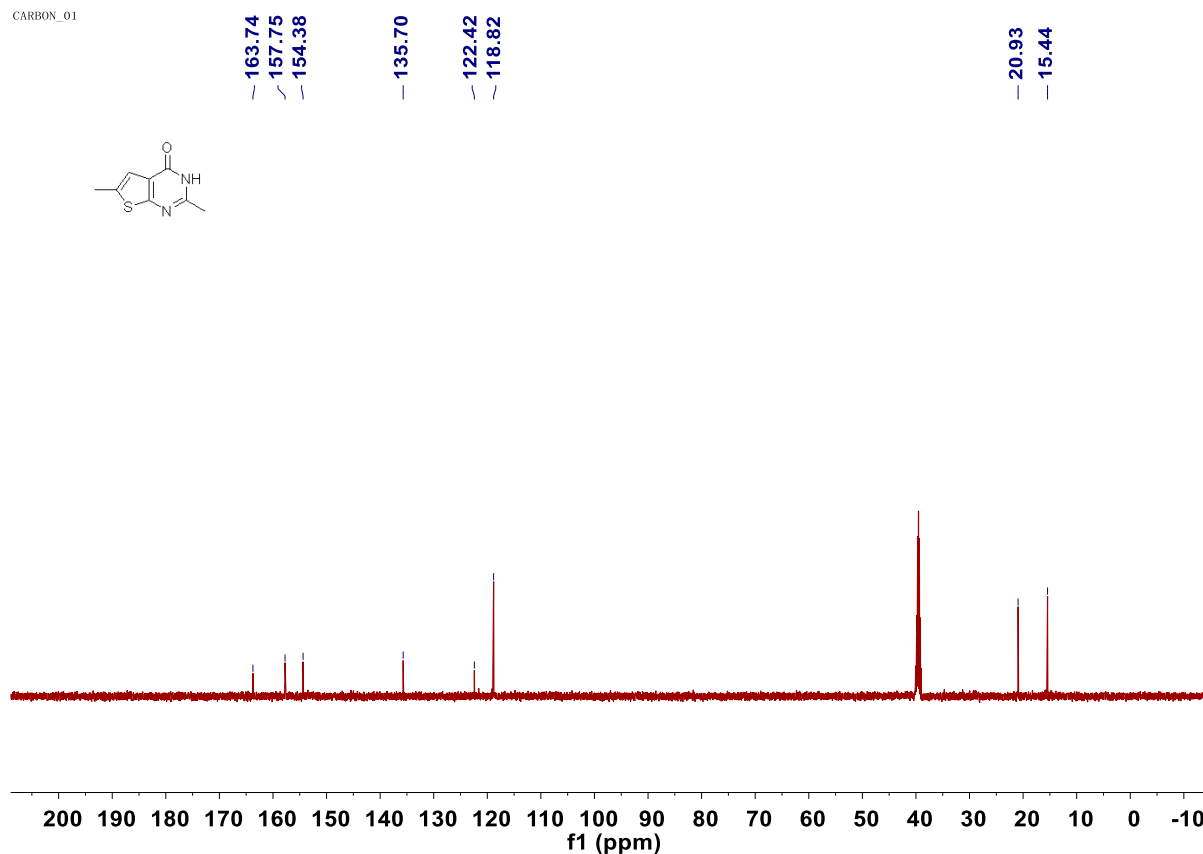

**<sup>1</sup>H NMR (500 MHz, DMSO-*d*<sub>6</sub>) of (E)-2-((2-oxoindolin-3-ylidene)methyl)quinazolin-4(3H)-one (5aa)**

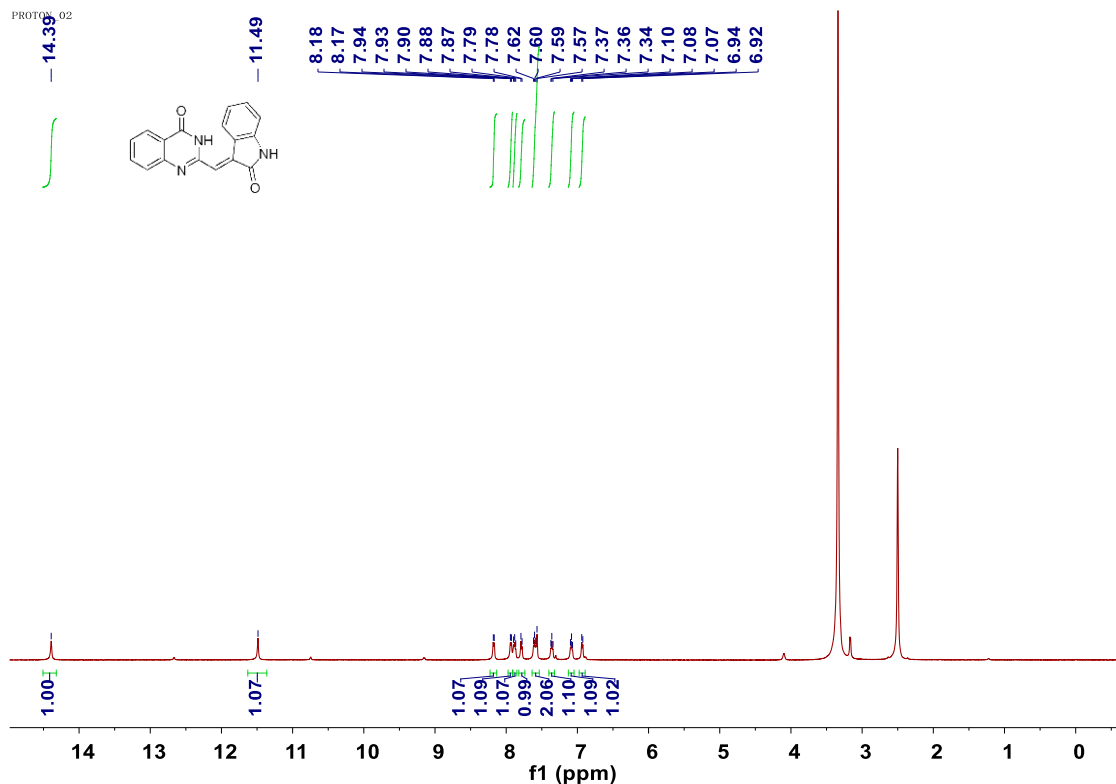

**<sup>13</sup>C{<sup>1</sup>H} NMR (126 MHz, DMSO-*d*<sub>6</sub>) of (E)-2-((2-oxoindolin-3-ylidene)methyl)quinazolin-4(3H)-one (5aa)**

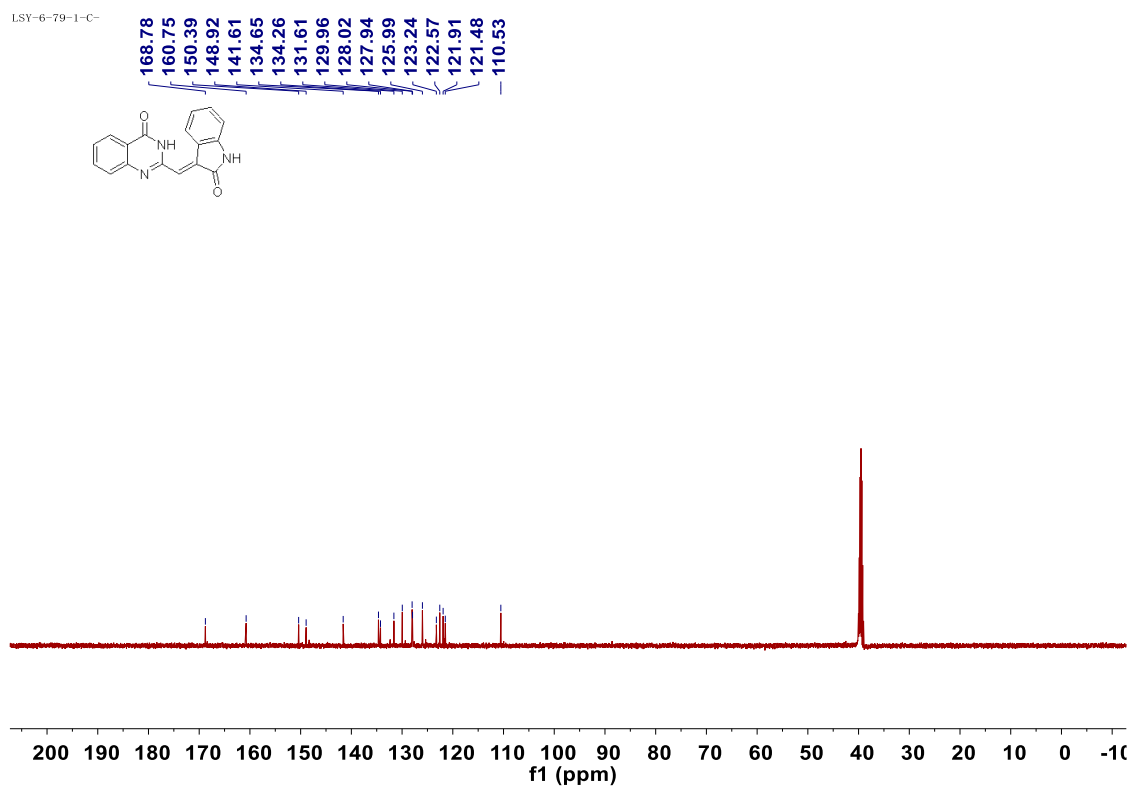

Supplement: d5qo01490e1.pdf [file d5qo01490e1.pdf]
